# Supplementary material for: The origin of domestication genes in goats
Source: PubMed Central journal article supplement — Sci Adv. 2020 May 20;6(21):eaaz5216. doi: 10.1126/sciadv.aaz5216 (PMC7314551; doi:10.1126/sciadv.aaz5216), 2020-05-20
Supplement: aaz5216_SM.pdf [file aaz5216_SM.pdf]

## Supplementary Materials for

### **The origin of domestication genes in goats**

Zhuqing Zheng, Xihong Wang, Ming Li, Yunjia Li, Zhirui Yang, Xiaolong Wang, Xiangyu Pan, Mian Gong, Yu Zhang, Yingwei Guo, Yu Wang, Jing Liu, Yudong Cai, Qiuming Chen, Moses Okpeku, Licia Colli, Dawei Cai, Kun Wang, Shisheng Huang, Tad S. Sonstegard, Ali Esmailizadeh, Wenguang Zhang, Tingting Zhang, Yangbin Xu, Naiyi Xu, Yi Yang, Jianlin Han, Lei Chen, Joséphine Lesur, Kevin G. Daly, Daniel G. Bradley, Rasmus Heller, Guojie Zhang, Wen Wang, Yulin Chen\*, Yu Jiang\*

\*Corresponding author. Email: [yu.jiang@nwafu.edu.cn](mailto:yu.jiang@nwafu.edu.cn) (Y.J.); [chenyulin@nwafu.edu.cn](mailto:chenyulin@nwafu.edu.cn) (Y.C.)

Published 20 May 2020, *Sci. Adv.* **6**, eaaz5216 (2020)

DOI: [10.1126/sciadv.aaz5216](https://doi.org/10.1126/sciadv.aaz5216)

#### **The PDF file includes:**

- Supplementary Materials and Methods
- Supplementary Text
- Figs. S1 to S31
- Tables S1 to S15
- Legends for data files S1 to S7
- References

#### **Other Supplementary Material for this manuscript includes the following:**

(available at [advances.sciencemag.org/cgi/content/full/6/21/eaaz5216/DC1](https://advances.sciencemag.org/cgi/content/full/6/21/eaaz5216/DC1))

Data files S1 to S7

## Supplementary Materials and Methods

### Section 1. Read alignment

#### 1.1 Modern genome sequence data

To obtain high-quality reads and minimize false genotyping due to low-quality reads, we implemented the following quality control procedures to filter the reads using Trimmomatic v0.36 (60). First, leading or trailing stretches of Ns and bases with quality below 3 were trimmed. Second, the reads were scanned with a 4-base-wide sliding window, cutting when the average quality per base dropped below 15. Finally, only reads with 40 nucleotides or longer were kept.

High-quality paired reads were aligned to the latest goat reference genome (GCF\_001704415.1) (61) using BWA-MEM v0.7.15 (62) with default parameters except that “-M” was enabled. The alignment BAM files were then processed to sort reads, merge read groups belonging to the same sample, and mark duplicates using Picard v2.1 (<https://broadinstitute.github.io/picard/>). We then estimated the coverage distribution at each called site for each sample only using reads with a mapping quality above 20 using QualiMap v2.2 (63).

#### 1.2 Ancient genome sequence data

We collected a total of five ancient goat samples (table S3). Sample SMG07 (a mandibula) and SMG11 (a humerus) (fig. S3A) were excavated from the Shimao site, an important Neolithic walled settlement in Shenmu County (Shaanxi province, China) in the northern part of the Loess Plateau (14). These two remains have been dated as early as 3,975-3,835 cal BP based on radiocarbon dating of cattle bones which were excavated jointly with these samples (64). Sample WDH06S (a tooth, dating to approximately 2,500 cal BP) (fig. S3A) was obtained from the Wangdahu site located in Pengyang county (Ningxia province, China). Sample KA01G from Northern Caucasus was dated to 1,296-1,270 cal BP. Sample YJL02G (a humerus) (fig. S3A), excavated from Yanjialiang site (Inner Mongolia Autonomous Region, China) was dated to 700-600 cal BP (Yuan Dynasty) with 95% confidence interval using radiocarbon dating conducted by Beta Analytic Radiocarbon Dating Laboratory (Miami, FL, USA) (65).

The dust and clay on the outer surface of teeth or bones were cleaned with a fur brush. Subsequently, the cleaned samples were cut into small pieces and soaked in 10% bleach for 20 min, rinsed with ethanol and distilled water, and then subjected to UV-irradiation for 30 min on each side. Finally, the samples were powdered under liquid nitrogen using a 6850 Freezer Mill (SPEX CertiPrep, Methuen, NJ, USA).

Ancient DNA was extracted from the sample powder by using a modified silica-based spin column method (66) in a dedicated ancient DNA laboratory at Jilin University. Briefly, 200 mg of the powder was incubated overnight with 3 ml of lysis buffer (0.5 M EDTA pH 8.0 and 0.5 mg/ml Proteinase K) in a rotating hybridization oven at 50°C (220 rpm/min). After centrifugation, the supernatant was transferred into an Amicon® Ultra-4 centrifugal filter device (Merck Millipore Ltd, 10000 Nominal Molecular Weight Limit), reduced to less than 100 µl, and purified with QIAquick® PCR Purification Kit (QIAGEN).

Genomic DNA libraries for the Illumina platform were prepared from 55.5 µl of ancient DNA using NEBNext® Ultra™ DNA Library Prep Kit for Illumina® (New England Biolabs

Inc.) following the manual, with some minor modifications as described below. The adaptor ligated DNA fragments without size selection were cleaned with the MinElute® PCR Purification Kit (QIAGEN) following the manual. PCR amplification of the adaptor ligated DNA fragments was then purified with 1.8× AMPure XP Beads (Beckman Coulter). After DNA library preparation, the genomic DNA libraries were quantified with Qubit® dsDNA HS Assay Kits in Qubit® 2.0 Fluorometer (Life Technologies), and sent to Novogene for Paired-End sequencing (2×150 bp) on a HiSeq X Ten Platform.

Adapter sequences and low-quality bases were removed from the reads using AdapterRemoval v2.2 (67), followed by read mapping using BWA v0.7.15 (68) with the seed option (“-l 1024”) disabled. Alignments showing mapping qualities lower than 20 were discarded. PCR duplicates were then removed on 5’ read coordinates for single-end sequencing reads and both start and end for collapsed paired-end data using SAMtools v1.3 (69). Finally, reads were realigned around indels using the IndelRealigner procedure from GATK v3.7.0 (46). The presence of nucleotide misincorporation profiles typical of ancient DNA data was verified using mapDamage2 (70) (figs. S2B to S2F). Genome coverage was calculated via mosdepth (71). Sex determination was performed by comparing coverage of the X chromosome versus coverage of autosomal chromosomes.

### 1.3 Historical genome sequence data

Genomic sequence reads from *C. caucasica* were first trimmed for adapter sequences and low-quality bases with AdapterRemoval v2.2 (67). To account for the evolutionary divergence between the reference genome and the historical samples, we used relaxed alignment settings (-l 1024 -n 0.01 -o 2) with BWA v0.7.15 (68). We excluded reads with a MapQuality score below 20 and removed duplicate reads with DeDup v0.12.3 (72). Damage patterns assessment using mapDamage2 (70), showed no signatures of increased damage in the nucleotide positions at the reads terminals (fig. S2A). The mtDNA haplotype of the historical sample was confirmed by examining the complete mtDNA consensus sequence generated on the Illumina platform (fig. S1D).

We reanalyzed the ancient goats with >0.01× mean coverage from ref. (6). After removing the adapter sequences using cutadapt v1.16 (73) (cutadapt -a AGATCGGAAGAGCACACGTCTGAACTCCAGTCAC -O 1 -m 30), the short read alignment was performed using BWA v0.7.15 (68) with the seed option (“-l 1024”) disabled. Alignments showing mapping qualities lower than 20 were discarded. PCR duplicates were then removed on 5’ read coordinates for single-end sequencing reads and both start and end for collapsed paired-end data using SAMtools v1.3 (69). Finally, reads were realigned around indels using the IndelRealigner procedure from GATK v3.7.0 (46).

## **Section 2. Population structure and phylogenetic analysis**

The following nuclear genome analyses were performed using all modern samples, including those of both high and low genomic coverage.

### 2.1 Phylogenetic tree

For phylogenetic reconstruction, genetic distances were calculated between all individuals

using plink v1.9 (74). The distance matrix was subsequently used to construct a neighbor-joining (NJ) tree as implemented in MEGA v6.0 (75). The final tree topology was visualized using iTOL (76), and the tree was rooted at the branch of sibling *Capra* species. We also used all of the 5,043,096 fourfold degenerate (4d) sites to construct a maximum likelihood (ML) phylogenetic tree (fig. S4). Sites containing heterozygous SNPs were represented using the standard International Union of Pure and Applied Chemistry chemical nomenclature (IUPAC) codes (77). The concatenated sequences were used to build a maximum likelihood (ML) tree using RAxML v8.2.9 (78) with the following parameters: -f a -x 123 -p 23 -# 100 -k -m GTRGAMMA.

## 2.2 Principal component analysis (PCA)

We used linkage disequilibrium (LD)-pruned (plink: --indep-pairwise 50 10 0.2) unphased data to perform PCA using the smartpca program in the package of EIGENSOFT v6.1 (79) with default parameters and the settings numoutlieriter = 0 and numchrom = 29. The significance level of the eigenvectors was determined by a Tracy-Widom test.

## 2.3 ADMIXTURE software clustering

Population structure analysis and individual clustering were carried out using ADMIXTURE v1.3 (80) for  $k$  values from 2 to 7, using a 5-fold cross-validation procedure to test the fit. We ran ADMIXTURE 20 times per  $k$  and calculated the mean cross-validation error for each  $k$  across runs. The results were plotted using R (81). However, ADMIXTURE accuracy can be affected by sample size (82). For example, the genetic difference between bezoar and domestic goat populations here is greater than that estimated between EUR and EAS by pairwise genome-wide fixation index ( $F_{ST}$ ) (table S6), phylogenetic analysis and PCA (Fig. 1). However, at  $k = 2$ , ADMIXTURE analysis suggested the differentiation between western (Europe and Africa) and eastern (South Asia and East Asia) populations (fig. S5). This inconsistency may result from an inappropriate sampling scheme due to the presence of only a small number of bezoars. To minimize the effect of sample size variation, we randomly reduced the sample size in the different domestic populations (table S1). Following this strategy, the analysis revealed a clear structure between bezoar and domestic goat populations at  $k = 2$ , which was different from that detected in the full data-set (fig. S6). This discordance provides some hints on how sample size can substantially affect clustering and ancestral population inference.

To assess the effect of sample size described above, we also adopted two different sampling strategies based on simulations using fastsimcoal2 (83). We simulated SNP data with a model including three populations (POP1, POP2, and POP3) derived from the PCA and phylogenetic analyses. In this model, we assumed that POP2 and POP3 diverged from POP1 15,000 generations ago and that POP2 and POP3 diverged from each other 5,000 generations ago. The first strategy included an even sampling from all three populations and found that ADMIXTURE was indeed able to recover the correct population structure when sampling was even. The second strategy also involved three populations but in this case sampling across populations was uneven. The total number of samples used for these two sampling strategies was kept constant ( $n = 210$ ). The result of this analysis showed that, when samples were unevenly drawn from the three populations, at  $k = 2$ , the results of ADMIXTURE matched to an even lesser extent with the known three-population structure (fig. S7).

#### 2.4 TreeMix analysis

To confirm the population structure constructed by phylogenetic tree, PCA and admixture, we constructed a ML tree using TreeMix v1.12 (84) accounting for LD by grouping sites in blocks of 500 SNPs (-k 500). To allow for the geographic structure of the sampled bezoars, we divided bezoars into three regional populations (Azerbaijan, Alborz, and Zagros) based on initial PCA and ADMIXTURE analysis. The confidence of the inferred tree topology was evaluated through 100 replicates. The inferred trees and corresponding residuals were visualized with the in-built R script plotting functions of TreeMix software (fig. S8).

#### 2.5 ChromoPainter and fineSTRUCTURE analysis

In addition to the approaches described above, we also investigated the population structure and relationships between different populations using ChromoPainter/fineSTRUCTURE v2.1.3 (85), which can explicitly model the correlation between nearby SNPs and use extended multi-marker haplotypes. All haplotypes of the 164 modern goats and 24 modern bezoars extracted from the BEAGLE-phased data were analyzed using the ChromoPainter linked model. We performed expectation maximization (EM) inference using 50 EM steps to estimate the effective population size from our data and then used this estimated parameter in ChromoPainter. To perform Markov Chain Monte Carlo (MCMC) analysis, we used 1,000,000 burn-in iterations and 1,000,000 sample iterations with a thinning interval of 10,000. Visualization of the posterior distribution of clusters was then performed using the tree-building algorithm of fineSTRUCTURE (fig. S9). Since the results may be affected significantly by sample size of each population, the exact populations and breeds sampled etc., they should be treated as an approximate guide to genetic similarity, rather than as a full population history.

#### 2.6 LD analysis

The LD coefficient ( $r^2$ ) was calculated pairwise between high-quality SNPs with minor allele frequencies greater than 0.05 using Haploview (86). The parameters were set at “-minMAF 0.05 -hw cutoff 0.001”. To minimize bias due to sample size, we randomly reduced the size of EUR, AFR, SWA, and EAS to 16 (fig. S10A).

### **Section 3. Demographic reconstruction**

#### 3.1 Estimating mutation rate and generation time

The mutation rate ( $u$ ) for goats was estimated using the homologous DNA sequences from goats and sheep (*Ovis aries*) (52). The sequence divergence ( $D$ ) between two species was estimated to be 0.022848. The divergence time ( $T$ ) was estimated to be approximately 5.29 million years (52), and the mean generation time ( $g$ ) for goats was set to 2 years (51). Therefore, the  $u$  was  $4.32 \times 10^{-9}$  per generation per site for goats, which was estimated by the formula  $u = (D \times g)/(2 \times T)$ . Our estimation is similar to that obtained (a rate of  $2.23 \times 10^{-9}$  per year per site for *Capra ibex*) based on phylogenetic comparisons of diverse ruminant taxa (52).

Note that the use of phylogenetic comparisons can generally avoid the influence of generation time and mutation rate on the population divergence time. The program we used

(see below) all output the scaled times which are given in units of the per-generation mutation rate. This means that in order to convert scaled times to generation, divide them by the mutation rate ( $u$ , site/gen). To convert generations into years, multiply by the generation time ( $g$ , years). Thus, population divergence time is affected by the ratio between  $g$  and  $u$ . According to the above formula, we can find that  $g/u$  is only related to  $D$  and  $T$ . If we use a generation time of four years, the  $u$  will also be doubled; however,  $g/u$  will remain constant.

### 3.2 MSMC analysis

A Multiple Sequential Coalescent Markovian model (MSMC2, an updated version of MSMC) (87) was used to reconstruct the effective population size and split history of bezoar and domestic populations over time. To ensure that heterozygous loci were called, we only used high-coverage data (ranging from  $11\times$  to  $43\times$ ) from each population. We also applied the genome mask as recommended in the documentation of the software. The alignability of each base in the reference genome was evaluated using ComputeGenomeMask, which is a part of Genome STRiP2.0 (88), and a mask file containing the sites with depth between half and twice of mean depth generated with custom scripts from `msmc-tools` (<https://github.com/stschiff/msmc-tools>). Two individuals (4 phased haplotypes) from each population were used to infer the effective population size. For relative cross-coalescence rate (RCCR) inference, we used one pair of individuals from each population. To take into account the uncertainty about the parameters of mutation rate and generation time, we used the time points with a RCCR of 0.25 and 0.75 to provide a time range when the population split might have occurred.

### 3.3 SMC++ analysis

Because the accuracy of the MSMC method is sensitive to haplotype phasing quality, we also estimated population size histories and split time using SMC++ (89), which does not rely on haplotypic phase information. However, when making inferences about times of divergence, the SMC++ assumes a ‘clean split’ model, in which no gene flow occurs after the populations split (89). We used 11 genomes (table S1) from each group of EUR, AFR, SWA, and EAS for this inference and excluded the low-alignability regions identified by Genome STRiP2.0. Due to the limited sample size and sequencing depth for three substructured bezoar populations, we used 7 genomes for Azerbaijan, 6 genomes for Alborz and 3 genomes for Zagros bezoar. We measured the variance of the estimated results by a bootstrapping strategy, which was performed by breaking up the genome into 5-Mb segments and then randomly sampling with replacement.

### 3.4 $\partial a \partial i$ analysis

To further derive a more detailed demographic model, we analyzed the joint allele frequency spectra with diffusion approximation for demographic inference ( $\partial a \partial i$ ) (90). Based on the population structure and the model-based assignment of the individual genomes, we constructed four domestic groups: EUR, AFR, SWA, and EAS. To minimize the effect of selection sweeps, we only considered genomic segments located at least 10,000 bp away from any coding locus. We also excluded the low-alignability regions identified by Genome STRiP2.0 and uncalled regions obtained from GATK. Finally, contiguous genomic regions of

at least 1 kb spanning a total of 454,292,184 bp were used for the demographic analysis. We estimated two-dimensional site frequency spectra (SFS) using the doSaf function within ANGSD to estimate per-site allele frequencies combined with the realSFS (91) program to optimize the genome-wide SFS. To minimize potential biases introduced by determining the ancestral allelic states, we used the folded SFS. As suggested in ref. (92), we specified simple models first and gradually fitted the models with increasing complexity (fig. S13). The likelihood and Akaike information criteria were used to optimize the model selection, with the best model shown in fig. S14. We also performed nonparametric bootstrapping (100 replicates) to determine the confidence interval of each parameter.

## Section 4. Uniparental markers

### 4.1 Mitochondrial DNA

To assemble complete mitochondrial genomes (mtDNA), we mapped the clean paired reads to the mitochondrial genome (GenBank: GU068049.1). Given that mitochondrial genomes are circular, we added 300 of the first base pairs to the end of the reference to assure equal coverage of the sequences across the mtDNA. For each sample, reads showing unique hits after removing duplicates were included for subsequent analysis. To obtain highly accurate haplotype information, four individuals (FRCH05, CNSCH09, FRCH06, and NLCH03) were filtered out due to low sequencing coverage (100×). The filtered sequences were then aligned to an unmodified reference using MIA (93)

(<https://github.com/mpieva/mapping-iterative-assembler>; parameters: -H 1 -i -c). Additional whole mtDNA sequences corresponding to individuals of known haplogroup affiliation were retrieved from GenBank. ML phylogenetic tree was constructed from the alignment (94) of all of the filtered sequences (fig. S29A).

### 4.2 Y chromosome

In the absence of a reference sequence for the goat Y-chromosome, we used a read depth-based method implemented in CNVcaller (95) to identify the putative Y-linked scaffolds by comparing the average copy number (CP) between females ( $CP < 0.1$ , sample size = 112) and males ( $0.25 < CP < 0.75$ , sample size = 83). In this way, we identified 345 Y-chromosomal scaffolds summing up to 12,137,976 bp (Data file S7).

We first called the putative variant sites within the identified Y-chromosome scaffolds using GATK HaplotypeCaller (46). Female individuals were used as control. No more than three females should have high-quality mapped reads in the putative variation sites. To construct a preliminary consensus call set, the list of the putative sites was used as a “-sites” file input for ANGSD for all male individuals, including one *C. sibirica* (80 individuals in total). We then applied five filters to obtain confident Y-chromosome SNPs: (a) keep only biallelic SNPs; (b) no individual should have maximum-likelihood genotype state as heterozygous; (c) the filtered-read depth across all individuals should be between 300 and 700; (d) number of individuals with zero high-quality reads mapping to the site should be below three; and (e)  $P$  value  $< 1 \times 10^{-6}$ . Genotypes were then called using BEAGLE, which yielded a total of 61,934 SNPs. We then used this call set to construct the ML phylogenetic tree using RAxML (fig. S29B). We also used the 18,232 SNPs showing polymorphism in bezoars and domestic goats

to build a Minimum Spanning Network using pegas (96) (fig. S30A). Each individual was also assigned to the two Y-chromosome haplogroups (Y1 and Y2) that have been previously described (97).

For Y chromosome haplogroup calling in ancient samples, we filtered out reads with mapping quality below 25, bases with base quality below 20, and restricted the analysis to positions covered at least 2-fold. We used 6,916 Y-chromosome SNPs showing  $F_{ST} = 1$  between haplogroups Y1 and Y2 to obtain haplogroup calls for each sample with ANGSD. The heatmap based on the haplogroups is presented in fig. S31. We found that early domestic goat haplogroups are highly structured, and this pattern has continued in the modern samples.

#### 4.3 Estimating the divergence time of the paternal lineages

The Y-linked scaffolds were used to estimate the split time between the different paternal lineages, using argali (*Ovis ammon*) as an outgroup. Y consensus sequences were generated using ANGSD for the outgroup and 8 bezoar individuals representing four clades. Called positions were required to have a depth of coverage  $\geq 2$ , and only bases with quality  $\geq 20$  were considered. The resulting FASTA file for every individual was then concatenated to a single sequence. Then, data from all individuals were combined to obtain a multiple alignment file. Additionally, the alignment file was manually inspected to remove sites containing ambiguous sites and gaps. This strict filtering yielded an alignment file 5,108,492 bp in size. We converted the FASTA alignment file to NEXUS format. The NEXUS formatted file was used to generate the BEAST XML input file for the BEAST v2.4.8 program (98). To estimate split time among paternal lineages, we used a strict clock model, a Yule tree model and a log normal prior of 5.29 Mya (mean = 1.665, SD = 0.08) representing goat-sheep divergence (52). We chose TVM as the best substitution model, gamma-corrected to account for site heterogeneity, as indicated by the Bayesian Information Criterion in jModelTest v2.1.10 (99). We set the number of generations to 100 million. The log output files were obtained by running BEAST software. Tracer v1.6 (<https://github.com/beast-dev/tracer>) was used to analyze the output file and estimate split time, and TreeAnnotator v2.4.8 was used to obtain the maximum credibility tree topology. Finally, we visualized the tree in FigTree v1.4.2 (fig. S30B).

## **Section 5. Gene flow analysis**

### 5.1 $f_3$ statistic

The subsampled modern individuals (table S1) and ancient samples with average coverage  $>3\times$  (table S4) were included in the variant call set. As *qp3pop* included in the ADMIXTOOLS package (100) requires genotype calls, we randomly sampled genotypes according to the posterior probabilities as described in ref. (101). Only positions sequenced at least once in each individual were considered, resulting in a total of 36,435,593 polymorphic sites. For analyses involving ancient samples, only the 8,604,288 transversion sites were considered to reduce biases introduced by post-mortem DNA damage. We ran  $f_3$ -statistics on all possible triplets of modern populations. The results showed gene flows from AFR into SWA population (table S9). While investigating the admixture history of *C. caucasica* in the form of (modern bezoar, *C. caucasica*; target), we discovered a clear signal of admixture involving *C. caucasica* and modern bezoar from Azerbaijan as source populations and Hovk1 ( $>47,000$  BP Armenian



bezoar) as target (table S9).

### 5.2 *D*-statistic (ABBA/BABA test)

*D*-statistic was used to investigate population relatedness and test for gene flow between wild *Capra* species and domestic goat populations at the group level using doAbbababa2 in ANGSD (102). Bezoars and domestic goats were grouped as described in table S1. We calculated the *D*-statistics for the tree (((H1, H2) H3) argali), considering only the autosomal regions with a minimum sequencing base quality of 20 and a mapping quality of 25. H1 and H2 denoted two different domestic goat populations and H3 denoted *C. aegagrus* or other wild *Capra* species. To assess statistical significance, the *D*-statistics was represented as a Z score, by applying a jackknife procedure using a nonoverlapping 5 Mb sliding windows. An absolute value of Z score higher than 3 was considered to be significant. If H1 shared more alleles with H3 than H2 does, the *D*-statistic would be negative and vice versa.

### 5.3 Haplotype analysis of *MUC6* locus

We performed a haplotype analysis using the *MUC6* non-repeat region (29:46,258,000-46,268,000). The genotype likelihoods (GLs) of variant sites for all modern individuals were extracted via ANGSD (45), applying the same criteria described in methods (Read alignment and variant calling). Then, the GLs were converted into hard-called genotypes using BEAGLE (48, 49). This yielded a total of 304 polymorphic sites. We constructed a haplotype network including wild *Capra* species, modern bezoar, and domestic goats for the 10 kb *MUC6* non-repeat region using pegas (96). The observed haplotype structure clearly showed that the overwhelming majority of domestic haplotypes were more distant from their wild progenitor than from the *C. caucasica* haplotypes (Fig. 2F). We also estimated the time to the most common ancestor (TMRCA) based on the frequentist estimator (103):  $TMRCA = d_{ij}/2ul$ , where  $d_{ij}$  is the number of nucleotide differences between any two sequences (haplotypes)  $i$  and  $j$ ,  $u$  is the mutation rate ( $2.16 \times 10^{-9}$  per site per year), and  $l$  denotes the sequence length (10,000 bp). The TMRCA for the highly divergent haplotypes was estimated to be >1.5 million years (fig. S18A).

### 5.4 Simulations, selection on a *de novo* mutation and on standing variation

We used msms (104) to simulate SNP variants for a population of constant size with mutation, recombination and positive selection affecting a single site (command: -N 15000 -ms 328 10000 -s 86 -r Rec 10001 -Smu 0.0002592 -SAA Sel -SaA Sel/2 -SI 0.083333 1 Frq). In modern domestic goats, we found that 48 SNPs with derived allele frequency  $\geq 0.95$  and were highly differentiated with bezoars (had frequency 0 in bezoars) in the non-repeat region of *MUC6* (29:46,258,000-46,268,000). We performed simulations conditioning on 86 segregating sites (minor allele frequency  $\geq 0.01$  in domestic goats) in the 10 kb non-repeat region. Effective population size ( $N$ ) for domestic goats was estimated to be  $\sim 15,000$  (fig. S11). We assumed three different selection strengths for the homozygote ( $2Ns = 200, 500, \text{ and } 1,000$ , where  $s$  is the selection coefficient of the beneficial mutations.  $s$  for the heterozygote is half that for the homozygote). The recombination rate of the *MUC6* locus was  $\rho = 4Nr = 0$  (Fig. 3C), as estimated by FastEPRR (105). we also set two different recombination rates ( $4Nr = 10$  and

100, where  $r$  is the probability of cross-over per generation between the ends of the locus being simulated). We set the mutation rate to  $4.32 \times 10^{-9}$  per site per generation and generation time to 2 years, respectively (see section 3.1). For simulating selection, we assumed three varying initial frequencies (0, 0.01, and 0.1) for the beneficial mutation when selection started. A total of 27 conditions were simulated and each condition was simulated 10,000 times. For a rough comparison of the number of beneficial mutations in observed and simulated data, we counted the number of beneficial mutations which had a frequency  $\geq 0.95$ . We find that the observed number of nearly fixed beneficial mutations is significantly higher than what is expected by simulations under any of models explored (fig. S18B).

## Section 6. Selective sweep analysis

### 6.1 Genome-wide patterns of heterozygosity and neutrality tests

The nucleotide diversity ( $\pi$ ), population genetic differentiation ( $F_{ST}$ ), Tajima's D and Theta Watterson ( $\theta_w$ ) were calculated using a sliding window approach with windows of 50 kb and a step of 20 kb (106) (fig. S10B). To solve the problems of various sequencing depth and missing data, and to avoid ascertainment problems introduced by the SNP discovery process (i.e., incorporate uncertainty in the genotypes through direct analyses of the GL), an empirical Bayes approach was used to calculate site-specific posterior probabilities for the sample frequency spectrum using a ML estimation of the SFS, which records the proportions of sites at different allele frequencies as a prior. The SFS is typically computed for each population separately using program realSFS (91). Only the set of overlapping sites was considered robust for the analysis.

### 6.2 Screening for selective sweeps during domestication

To uncover genetic changes that may have been subject to selection during domestication, we combined all domestic goat populations into a single domestic gene pool, which can considerably reduce the confounding effects of population-specific genetic drift. We then searched for genomic regions with the highest differences in genetic diversity ( $\pi$  ln ratio bezoars/domestic goats) and exceptionally differentiated in allele frequency ( $F_{ST}$ ) between modern bezoars and modern domestic goats. The  $\pi$  and  $F_{ST}$  were calculated using a 50 kb window with a 20 kb step across the autosomal chromosomes. The  $\pi$  log-ratio was calculated as  $\ln(\pi_w) - \ln(\pi_D)$ , where  $\pi_w$  and  $\pi_D$  are the nucleotide diversity values for modern bezoars and modern domestic goats, respectively. We also performed the cross-population extended haplotype homozygosity (XP-EHH) test for every SNP using the default settings of the selscan v1.1 (107). For the XP-EHH selection scan, our test statistic was the average normalized XP-EHH score in each 50 kb region. An XP-EHH score is directional: a positive score suggests that selection is likely to have happened in domestic goats, whereas a negative score suggests the same about bezoars. To filter for candidate windows, we defined a significance level of  $P < 0.005$  (Z test, with  $F_{ST} > 0.195$ ,  $\pi$  ln ratio  $> 0.395$  and XP-EHH  $> 2.1$ ) (fig. S19). To provide better insight into the selective sweep, we also performed selective sweep analysis between modern bezoars and the four domestic populations (EUR, AFR, SWA-SAS, and EAS) defined by population structure analysis, separately (Data file S2). Moreover, to further evaluate the hypothesis of a selective sweep, Tajima's D and the composite likelihood ratio test

(implemented in SweepFinder2) (108) were applied to domestic goats using the same sliding window approach.

### 6.3 Selection sweep analysis on chromosome X

We analyzed chromosome X separately due to its difference from autosomes under several aspects, including a reduction in effective population size and recombination rate. In fact, chromosome X is more sensitive to genetic drift because of its reduced effective population size and different mutation rate, which can affect its genetic diversity. We calculated the  $F_{ST}$  and  $\theta\pi$  using a 50 kb window with a 20 kb step across chromosome X with VCFtools (47). We used the same method to define candidate domestication regions as described previously for the autosomes. We identified a total of 24 candidate selected regions on chromosome X (fig. S20 and table S11). One putative sweep region at NW\_017189516.1:13,720,001-14,450,000 had the most extreme signal in terms of markedly higher  $F_{ST}$  (0.748) and  $\ln(\theta\pi)$  ratio (3.081). This region harbors the *AR* gene that encodes the androgen receptor, which plays a crucial role in a wide range of developmental and physiological responses (109).

## **Supplementary Text**

### Text S1. Historical and ancient genomes analyses

With the objective of clarifying the ancestry of the specimen, we first investigated the horn morphology. Based on the morphological analysis, the specimen was assigned to the general ibex morphotype which is shared by *C. ibex*, *C. nubiana*, *C. sibirica*, and *C. caucasica* (7). The horn of this specimen displays a subtriangular equilateral horn cross-section without a well-defined frontal surface and with less prominent transverse knobs (fig. S1A), suggesting that morphological similarity to *C. caucasica* (110).

We then assessed its ancestry by molecular evidence. Phylogenetic analysis of the whole-genome and Y-chromosome data revealed that the specimen unambiguously grouped together with the ibex-like species (figs. S1C and S1E). Based on whole-genome data, the specimen was placed very close to *C. ibex*, well outside of other examined ibex-like species (fig. S1C). Furthermore, analysis of 11 diagnostic SNP markers (111) in our sequenced specimen and *C. ibex* genomes indicated that the specimen is genetically distinct from *C. ibex* (fig. S1B). Finally, maximum likelihood analyses of the whole mitochondrial genome revealed that the specimen and the available data from *C. caucasica* (GenBank: JN632609.1) belong to one clade (100% bootstrap) (fig. S1D). To rule out the possibility of recent hybridization with domestic goat, the absolute divergence ( $D_{xy}$ ) calculated in 1 Mb sliding windows between the specimen and *C. ibex*, and contrasted it with  $D_{xy}$  between the specimen and domestic goat. Over 99.7% of the windows show higher similarity with *C. ibex* than with domestic goat (fig. S1F), suggesting that recent hybridization between this specimen and domestic goat is highly unlikely. Moreover, a TreeMix analysis revealed that there was gene flow from this specimen to the ancestors of the goats and bezoars (confirming results from other analyses in the study), and suggested that the specimen is not the result of a recent hybrid origin (fig. S8). Together with the fact that the specimen was not captive-born, our results based on both molecular and morphology data confirm that the specimen belongs to *C. caucasica* and shows no signs of recent genetic admixture with other *Capra* species.

To investigate the temporal context of selection on specific genetic loci identified as differentiating modern domestic goats from their extant wild ancestors, we carried out direct shotgun sequencing with 0.04 to 13.44-fold coverage for five ancient domestic goat remains from North China and North Caucasus (fig. S3A and table S3), dating to between ~3,900 and ~600 years ago. For each ancient genome, the mitochondrial sequence was first assembled using MIA (93). After adding sequences representing the known goat mtDNA haplogroups, we then reconstructed the ML phylogenetic tree from the full multi-FASTA sequence alignment to assess the most likely phylogenetic placement of the five ancient samples. A total of three haplotypes were identified among the ancient specimens: three belonging to haplogroup A, one belonging to haplogroup B and one belonging to haplogroup C (fig. S3C).

The genetic affinities between the five ancient samples and the modern goats were assessed. First, a phylogenetic reconstruction based on pairwise genetic distances was carried out. We used ngsDist (112) to compute a pairwise genetic distance matrix, upon which a NJ tree was built with FastME (113). The tree was rooted at the branch of *C. sibirica* and *C. caucasica*. Clade support values were based on 100 bootstrap pseudo-replicates. Second, we also used the *D*-statistic (argali, ancient; H1, H2) (implemented in ANGSD, -doAbbababa 1) to evaluate the relationship without transitions. We only considered the positions with a minimum coverage of two-fold in the ancient sample. According to the NJ tree based on the pairwise genetic distances calculated with ngsDist, all four ancient goats from North China clustered tightly with present-day East Asian goats, while the ~1,300 BP sample (KAG01) from North Caucasus showed affinity to present-day European domestic goats (fig. S3B). Additional *D*-statistic also supported this pattern (fig. S3D).

### Text S2. Demographic history

We inferred the population size of modern goats and bezoars using MSMC2 and SMC++. All domestic populations showed a remarkably similar history of a population decline from ~50,000-60,000 years ago until ~10,000-20,000 years ago, followed by population increase, suggesting that the ancestors of the sampled domestic goats originated from a limited population (figs. S11B and S11D). In the last 10,000 years, a somewhat different pattern emerged for the EAS population, reaching a nadir approximately 6,500 years ago, followed by population growth (fig. S11D). It is also notable that, starting from ~120,000 years ago, three distinct demographic histories were inferred for the bezoar populations native to different geographic areas (figs. S11A and S11C).

We then used MSMC2 and SMC++ to compute divergence times as a means to assess the time frame of the shared population history amongst domestic goats (fig. S12). We found that the time ranges estimated from MSMC2 and SMC++ are overlapped, however SMC++ provides a much narrower and more recent range (fig. S12B). This is partly due to the fact that SMC++ assumes a clean split model without subsequent gene flow (89). These analyses also suggested that a much older split time between eastern (EAS and SWA) and western (AFR and EUR) populations than did within each of them (fig. S12B). In particular, the split time between EAS and EUR inferred from both MSMC2 and SMC++ preceded the domestication event dated on archaeological evidence (~11,000 years ago). We also tested whether the RCCR patterns observed amongst EUR, AFR, and EAS could be the result of admixture with the modern bezoar. To test this, we computed their RCCRs without “bezoar-like” segments in the

genome. In an attempt to map “bezoar-like” segments, we used refined IBD (114) to identify segments inherited from a common ancestor in goat-bezoar pairs (segments with a LOD score < 3 and a length shorter than 50 kb were excluded). This resulted in 137-Mb of bezoar-like segments in domestic goat genomes. We then masked these segments and re-estimated RCCR with MSMC2. The results show that the observed RCCR patterns cannot be attributed to gene flow from modern bezoar (fig. S12B).

We further derived a more detailed demographic model using  $\partial a\partial i$ . The results showed that the initial divergence occurred 42,432 years ago between EUR and AFR (bootstrap 95% CI 30,087 to 54,929 years ago), 191,186 years ago between EUR and SWA (bootstrap 95% CI 158,396 to 242,618 years ago), and 159,086 years ago between AFR and SWA (bootstrap 95% CI 132,658 to 197,505 years ago), which are much earlier compared to the model-free (MSMC2 and SMC++) estimation. Given a complex picture of the mosaic origin of domestic goats, it is perhaps unsurprising that different methods demonstrate variability in their inferred population split times. However, our results from different methods consistently suggested an older divergence time between modern East Asian and European goat populations. In contrast, the initial divergence time between EAS and SWA was 10,374 years ago (bootstrap 95% CI 8,720 to 11,705 years ago), roughly coinciding with the estimations from MSMC2 and SMC++. We noted that the population pairs whose initial divergence was estimated to have occurred deeper in the past had a gradual decline in RCCR and a larger effective ancestral population size, perhaps reflecting complex ancestral structure with admixture. Additionally, we also observed that the ancestral effective population size was estimated to be large for these population pairs (table S7). A previous study on the evolutionary history of Tibetans found a similar discrepancy in estimated Han-Tibetan divergence time by means of MSMC and  $\partial a\partial i$ , which was explained by population structure between the ancestral Han and Tibetan subpopulations but with high rates of gene flow (115). In addition,  $D$  statistics show that domestic goat populations have different levels of allele sharing with three regional samples of modern bezoar populations (fig. S15A). Thus, our demographic history estimates from whole-genome data suggest that differential admixture from multiple divergent populations of wild goats could have contributed to the modern goat populations.

Of the six mitochondrial haplogroups so far identified in modern domestic goats, haplogroup A is overwhelmingly predominant (figs. S29A and S29C). Interestingly, we also identified two well-defined Y-chromosome haplogroups, Y1 and Y2, which diverged ~297,500 years ago (95% HPD interval: 252,600-346,300 years ago), using a high-resolution Y-chromosome haplotype network based on 18,232 SNPs (fig. S30). A recent study suggests that the frequency of mtDNA haplogroup A has changed dramatically during the Neolithic Age (6). By contrast, the frequencies of the Y-chromosome haplogroups remained relatively stable (Fig. 5B). Altogether, the spatial and temporal uniparental data suggest that mainly females participated in the migrations.

### Text S3. Comparison with previously identified candidate domestication loci

Several studies have attempted to identify regions that are strongly differentiated between domestic goats and bezoars, with the goal of identifying candidate targets of selection during domestication. Alberto et al. (5) found 44 candidate regions under selection. Out of these 44 regions, 27 regions show directional positive or stabilizing selection in domestic goats. Daly et

al. (6) identified 19 loci that underwent selective sweeps in either six eastern Neolithic genomes or four western Neolithic genomes by comparing each population to modern bezoar genomes. When compared to previous studies, we found 17 out of 27 loci from Alberto et al. and two out of 19 loci from Daly et al. passed our filtrations (Data file S2). Notably, the *KITLG* and *KIT* loci, which are the only two selected regions shared among Neolithic Balkan and Iranian populations, are also detected in our study. Regarding the reason that Daly et al. didn't detect the two highlighted positively selected loci (*STIMI-RRMI* locus and *MUC6* locus) in domestic goats identified in our study, the candidate adaptive variants of these two loci started with a very low frequency (0.07 and 0) during the Neolithic period, and increased gradually in frequency until ~6,500 years ago (Fig. 5A). This may explain why Daly et al. missed these two loci using samples only from the Neolithic Age.

Furthermore, our approach to identify candidate targets of positive selection during domestication differs from previous studies in several ways. First, we used the latest goat reference genome (ARS1) and annotation, which is one of the most contiguous assemblies among vertebrates. In contrast, Alberto et al. and Daly et al. used the previous goat assembly (CHIR1.0) (116). In CHIR1.0, the *MUC6* gene resided in a contig (NW\_005101268.1) which was not assigned to any chromosome, thus could not be identified by sliding window across chromosomes. Second, we used a different method (intersection of  $F_{ST}$ ,  $\pi$  ratio, and XP-EHH) to define selection sweeps compared to Alberto et al. (hapFLK and  $\pi$  ratio) and Daly et al. ( $F_{ST}$  and  $\pi$  ratio). Third, our study covers a more complete and global representation of samples, therefore, which enable us to detect common selection signals during domestication rather than a potential result of geographically restricted selection. As more modern worldwide domestic goats and ancient samples are sequenced, it is likely that these candidate sweeps will be refined and narrowed.

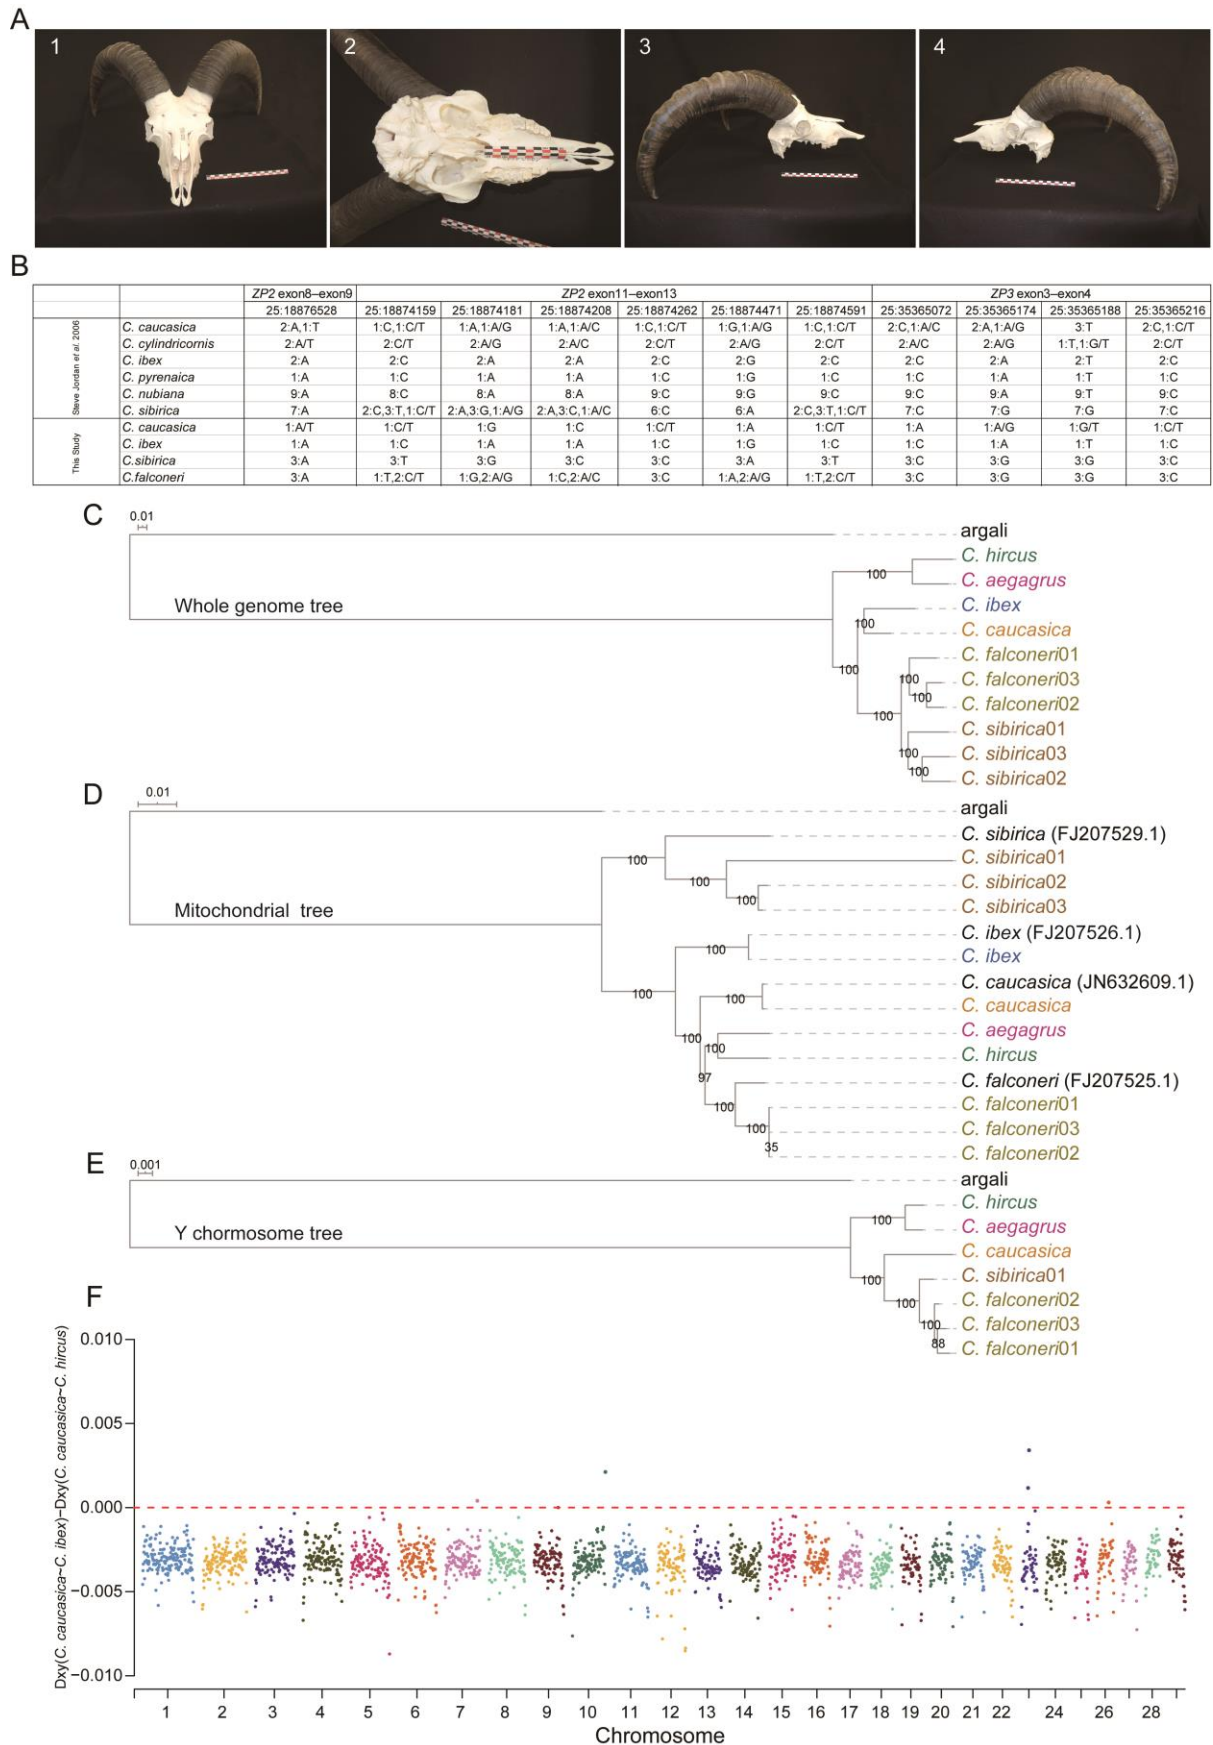

**Fig. S1.** Morphological and genetic analysis of historical *Capra caucasica* sample. (A) *C. caucasica* horn and skull morphology. (1) View from the top. (2) View from the back side.

(3) View from the right. (4) View from the left. Photo Credit: Joséphine Lesur, Muséum National d'Histoire Naturelle. **(B)** Diagnostic SNPs used to verify species status of the specimen. 11 SNPs across three regions, including parts of the *zona pellucida 2 (ZP2)* gene and the *zona pellucida 3 (ZP3)* gene. The genotype is noted below each column, and variants from that base, as well as their frequency, are noted within the column. **(C)** Neighbor-joining tree (100 bootstrap replicates) based on pairwise genetic distance calculated with ~68.2 million autosomal SNPs. **(D)** Maximum likelihood phylogeny (100 bootstrap replicates) of the mitochondrial genome. Species with an accession number were obtained from GenBank. **(E)** Maximum likelihood phylogeny (100 bootstrap replicates) of the Y chromosome. **(F)** Sequence absolute divergence (Dxy) calculated between *C. caucasica* and *C. ibex*, contrasted with Dxy between *C. caucasica* and *C. hircus*. Negative values indicate greater similarity with *C. ibex* than with *C. hircus*.



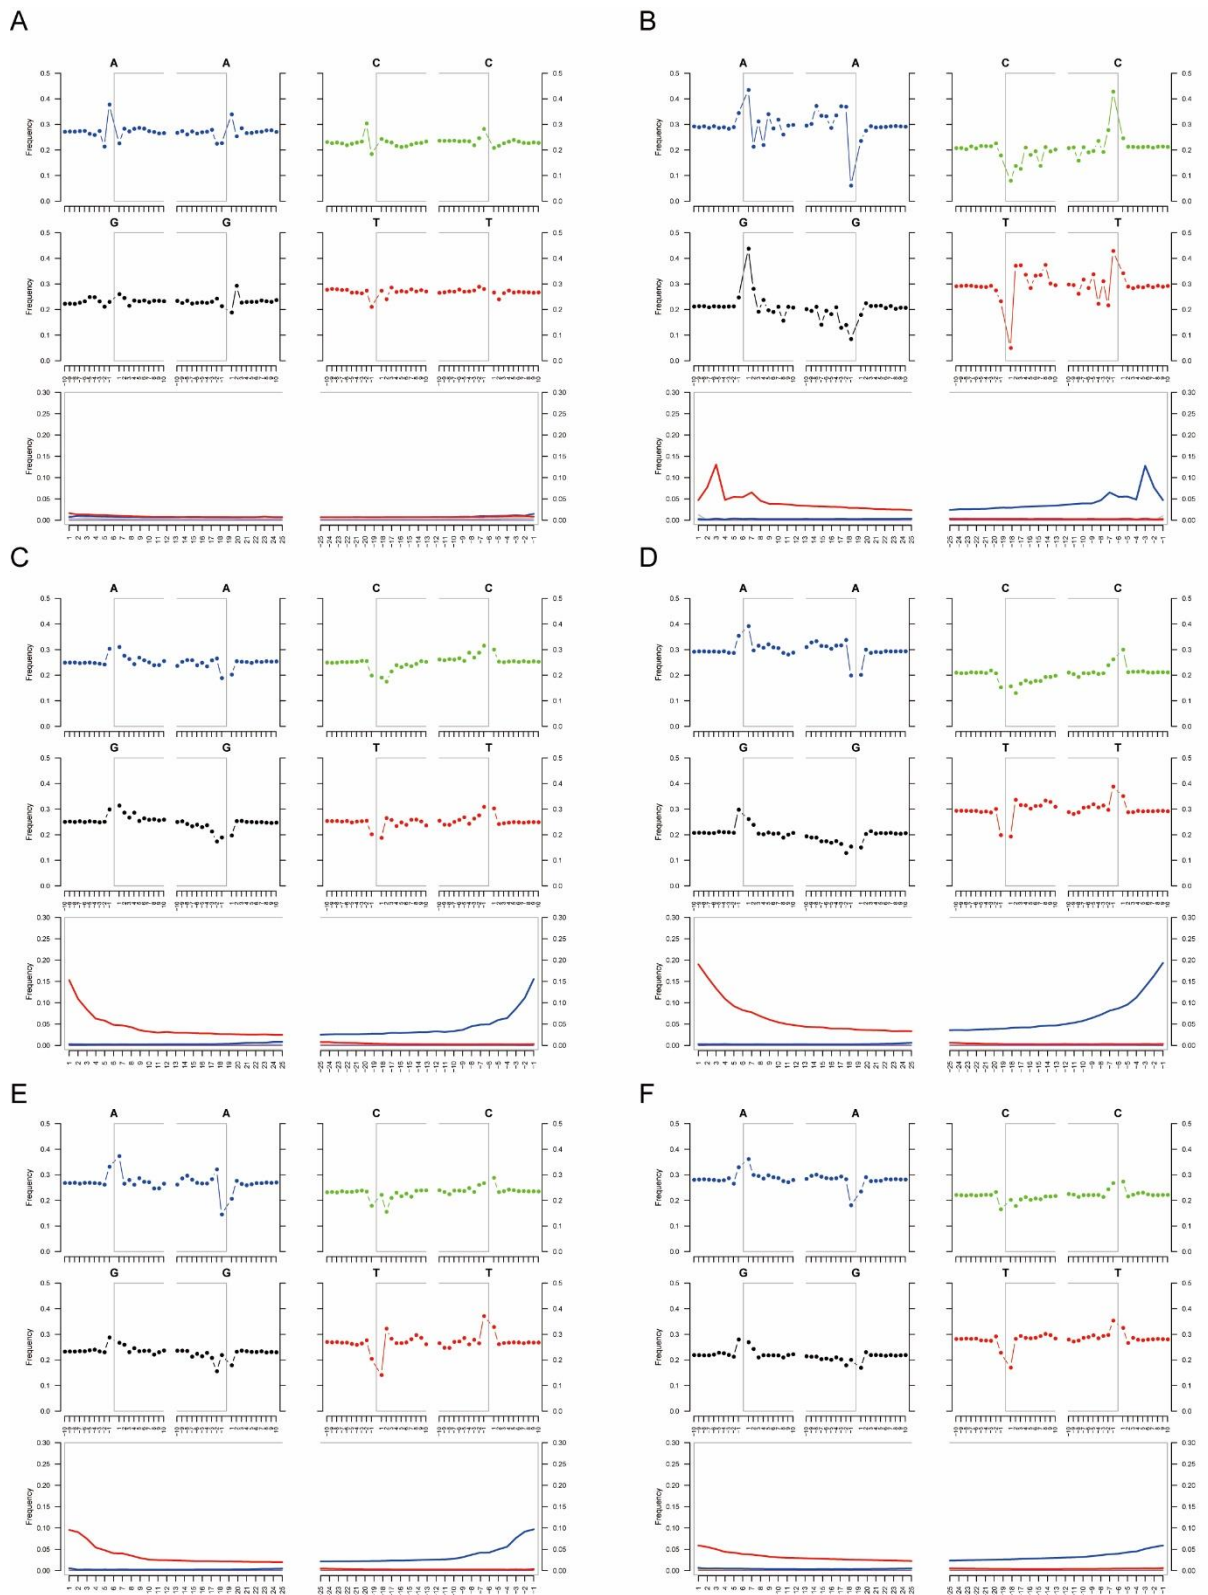

**Fig. S2.** DNA fragmentation and nucleotide mis-incorporation profiles for the historical and ancient genomes sequenced in this study. (A) Tur1 (*Capra caucasica*). (B) KA01G. (C) SMG07. (D) SMG11. (E) WDH06S. (F) YJL02G.

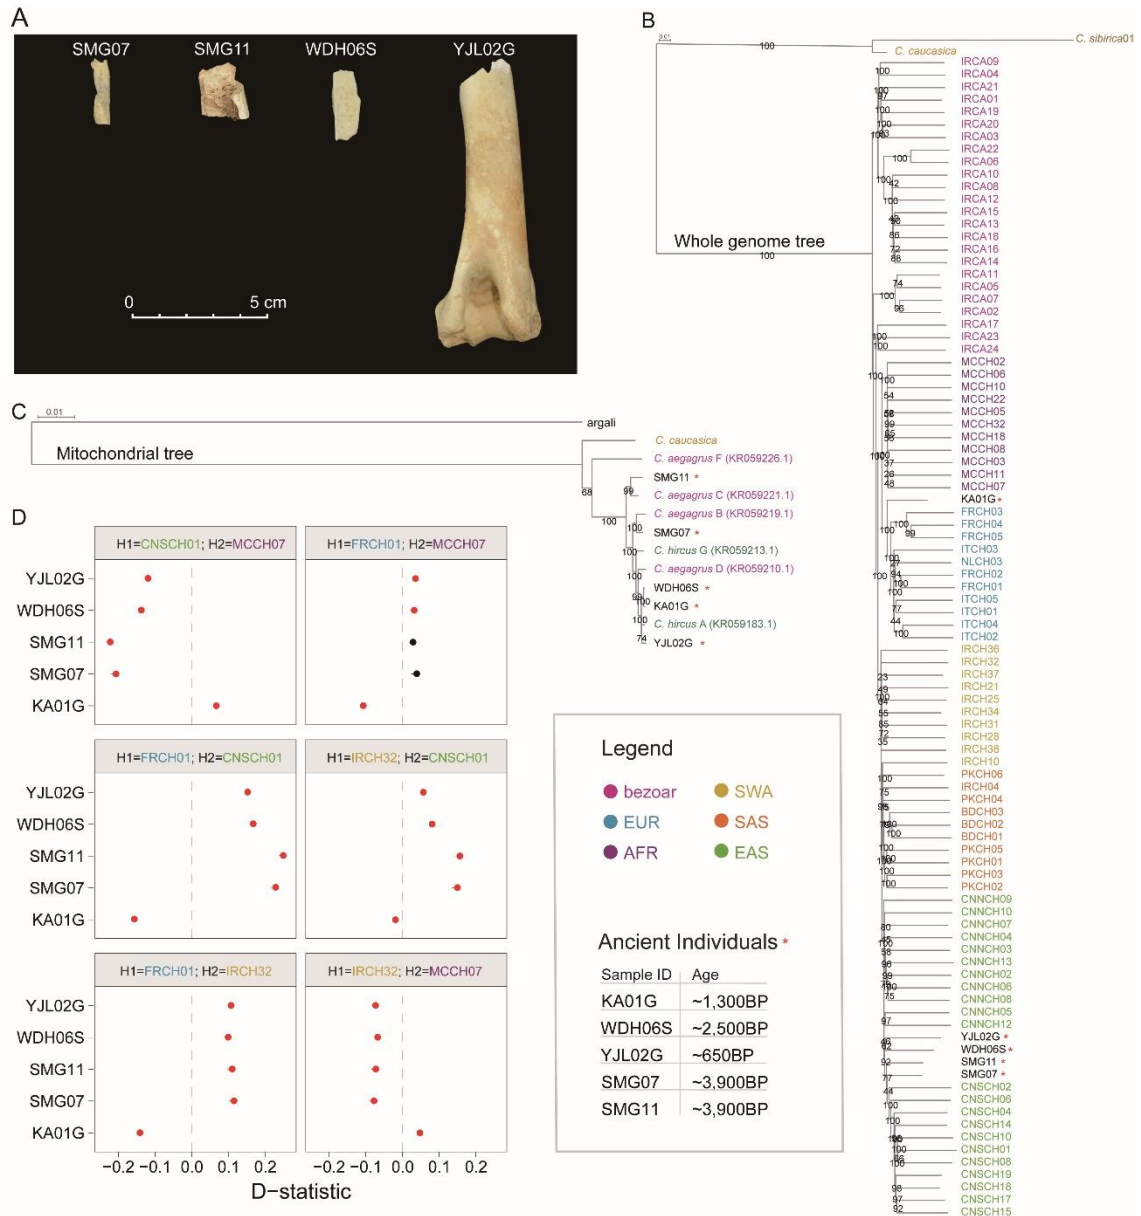

**Fig. S3.** Genetic analysis and genealogy of ancient bone samples. **(A)** Bones of the four ancient goats from North China. Mandibula (SMG07), humeri (SMG11 and YJL02G), and tooth (WDH06S). Photo Credit: Dawei Cai, Jilin University. **(B)** Neighbor-joining tree (100 bootstrap replicates) based on pairwise genetic distance calculated with ~13.7 million autosomal transversion sites. Labels are color-coded according to their respective populations. The ancient samples are highlighted by red stars. **(C)** Maximum likelihood phylogeny (100 bootstrap replicates) of the ancient mitochondrial genomes. Samples with an accession number were obtained from GenBank. **(D)** *D*-statistics in the form of (argali, ancient; H1, H2). Analyses have been carried out disregarding transitions. The names of the ancient goats are reported on the Y-axis. Positive values support a close relationship between H2 and the ancient goat, while negative values support a close relationship between H1 and the ancient goat. Red dots depict significant tests, defined by  $|Z\text{-scores}| \geq 3$ .

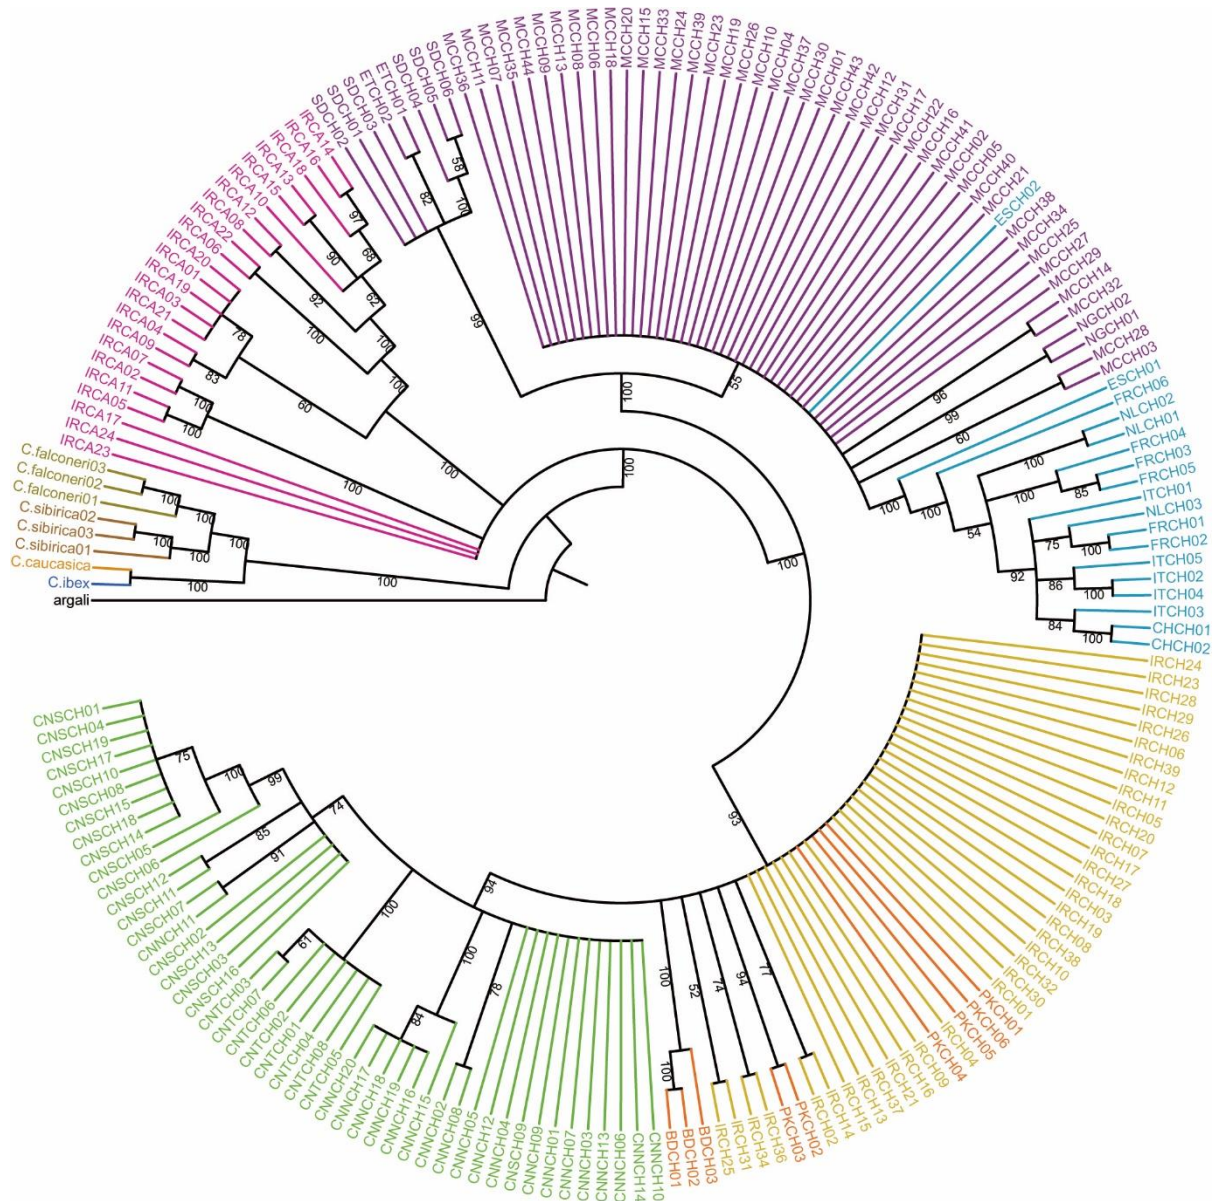

**Fig. S4.** Phylogenetic tree obtained using a set of 5,043,096 fourfold degenerate sites using RAxML. The numbers at branches indicate bootstrap support (100 replicates). Branch color indicates membership in different geographical populations. This analysis also confirms the population structure observed in other analyses.

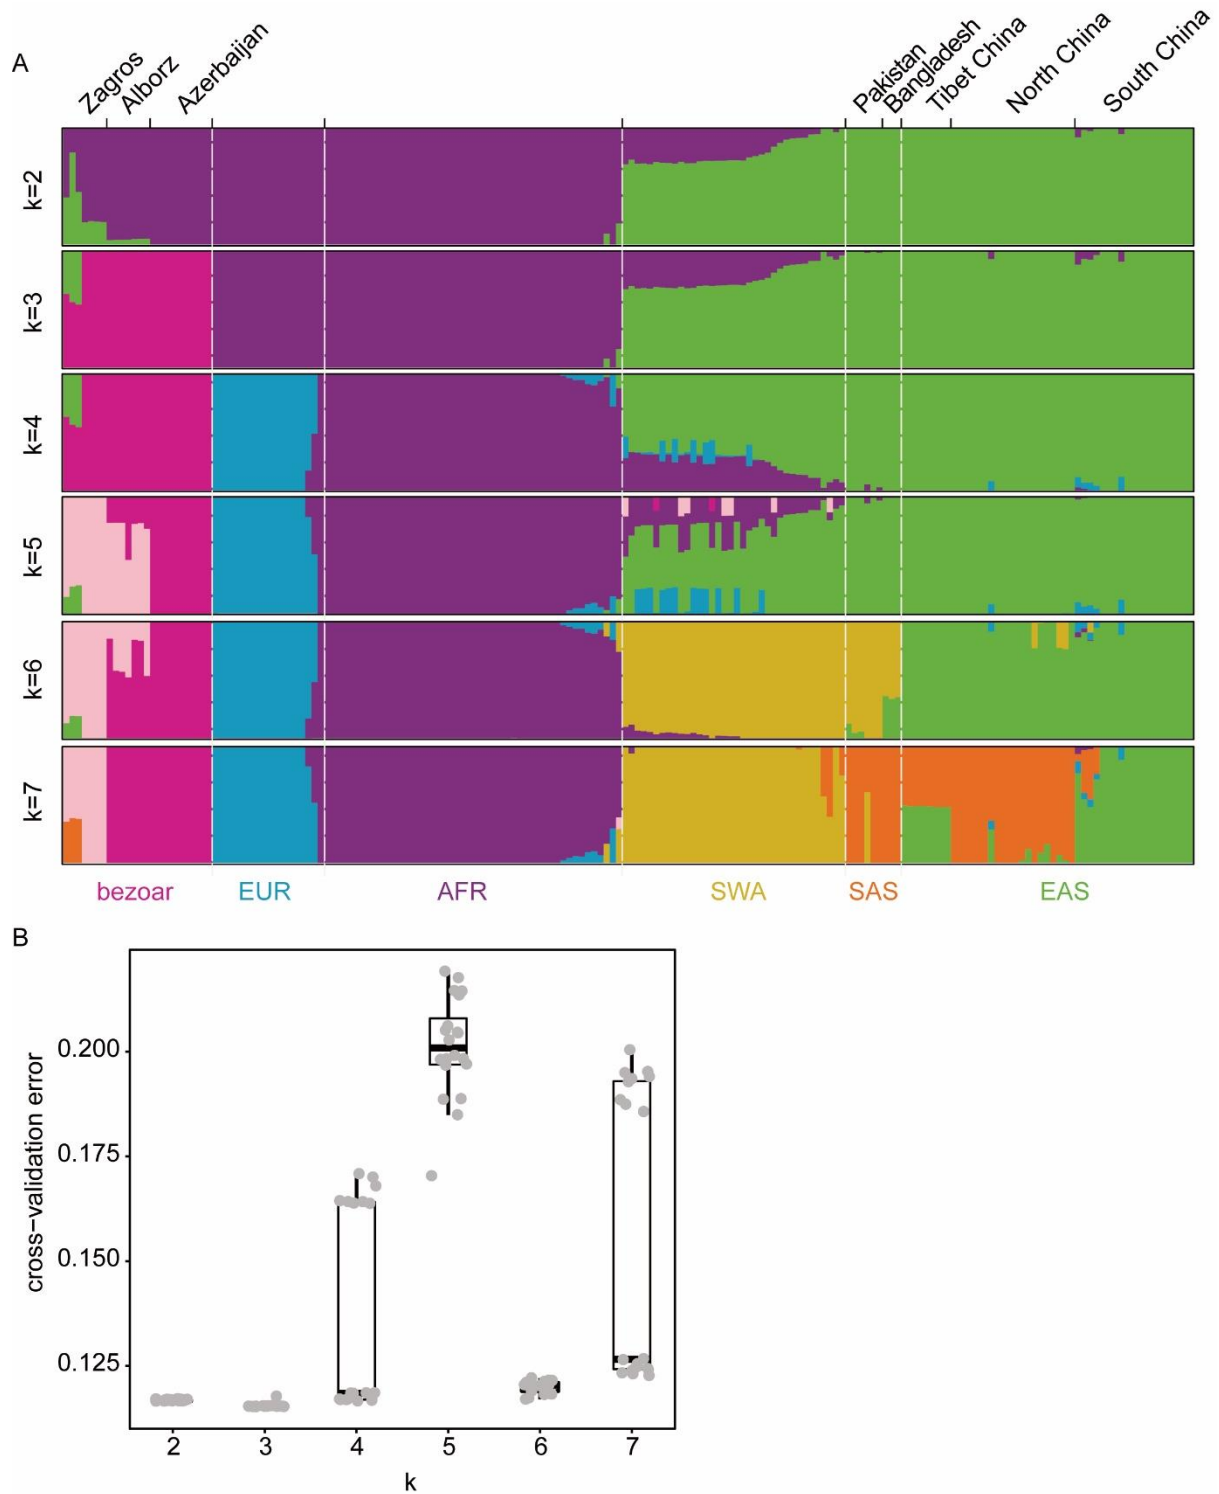

**Fig. S5.** **ADMIXTURE** analysis for SNPs from modern bezoars and domestic goats after **LD-pruning**. **(A)** ADMIXTURE results for  $k = 2$  to  $k = 7$ . The run with the lowest cross-validation (CV) error (out of 20 replicates) is plotted. The population names are at the bottom, and the black lines at the top of the figure denote the geographic locations of bezoar, SAS, and EAS. **(B)** CV error for varying  $k$  in the ADMIXTURE analysis.

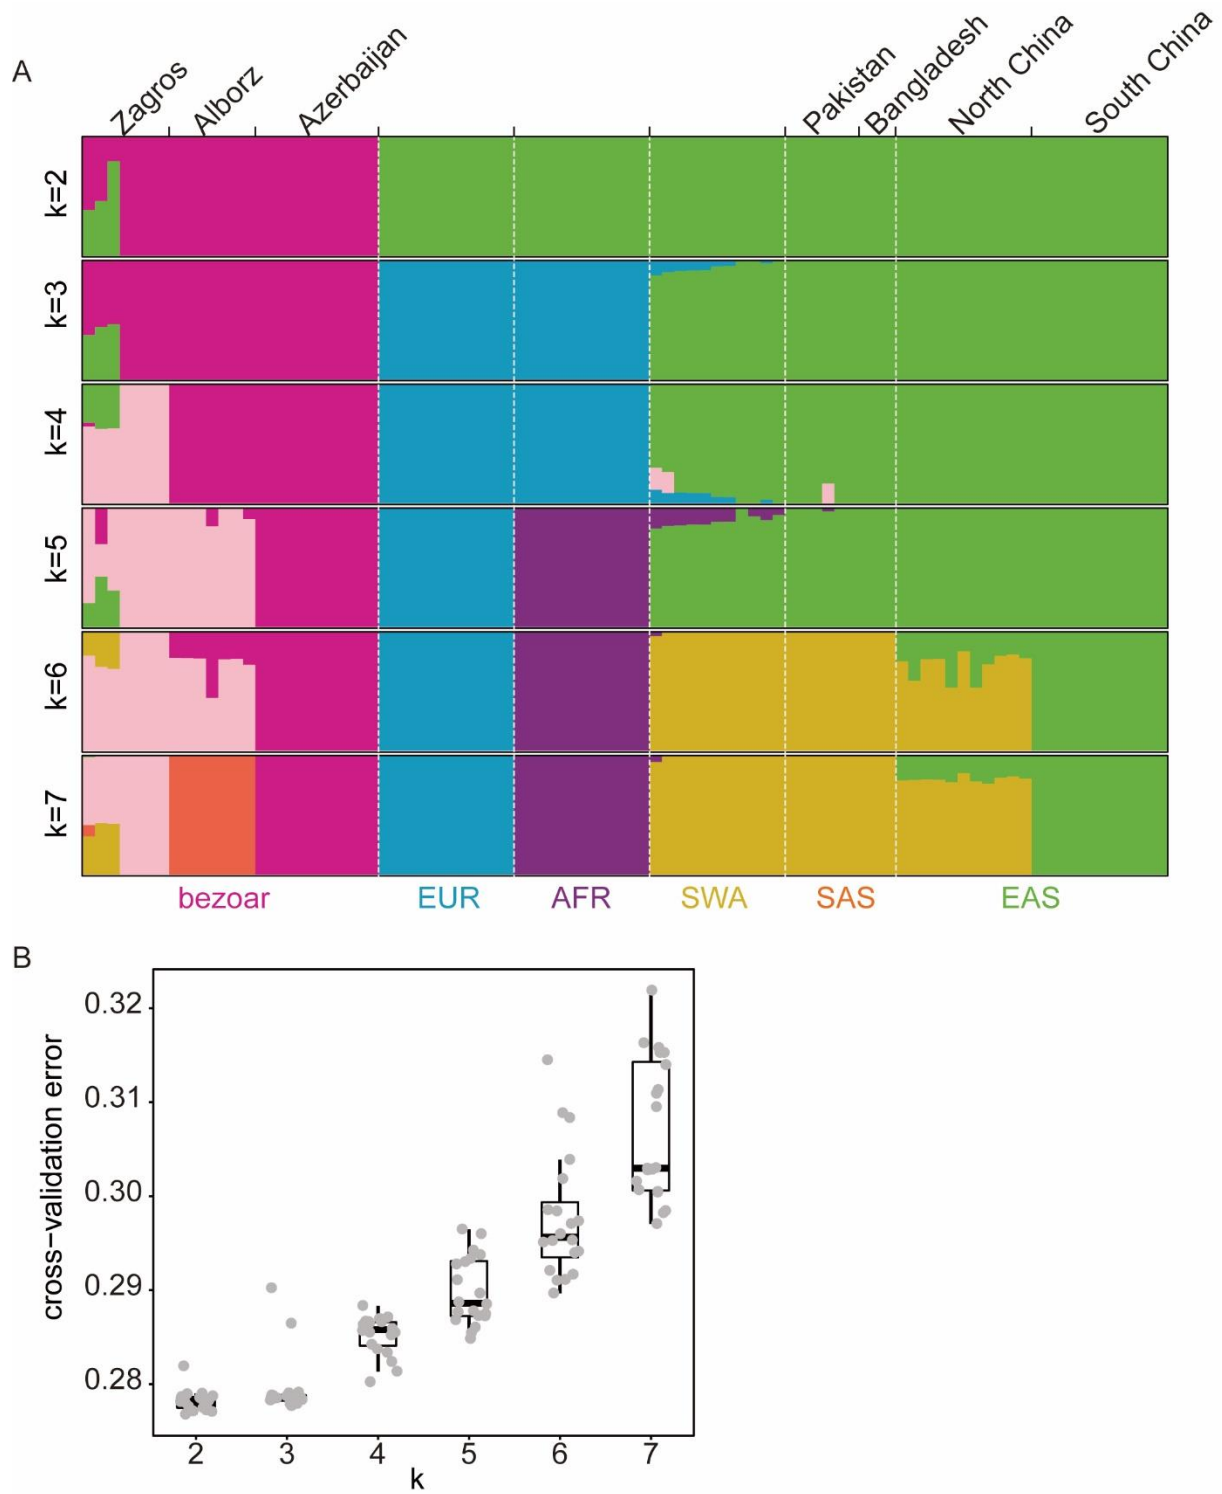

**Fig. S6.** **ADMIXTURE analysis on the subset of 88 samples.** (A) ADMIXTURE results for  $k = 2$  to  $k = 7$ . The run with the lowest cross-validation error (out of 20 replicates) is plotted. The group names are at the bottom, and the black lines at the top of the figure denote the geographic locations of bezoar, SAS, and EAS. (B) CV error for varying  $k$  in the ADMIXTURE analysis.

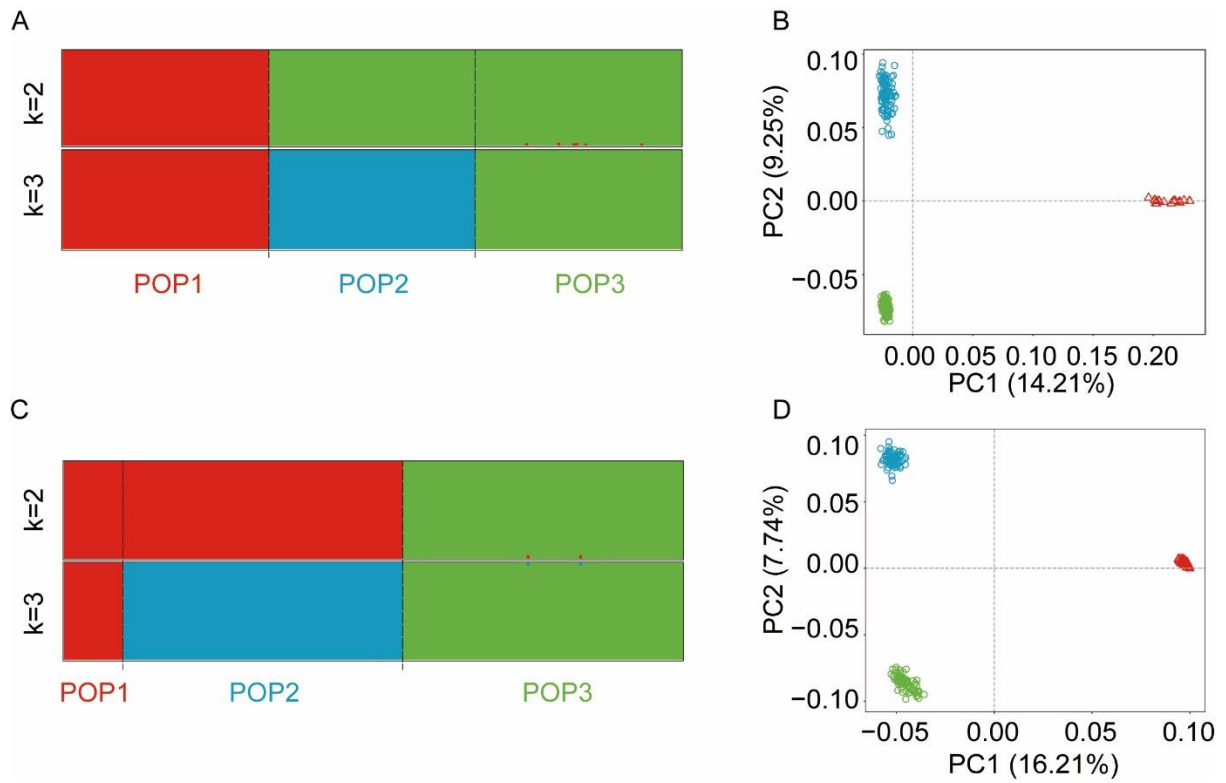

**Fig. S7.** Results from running ADMIXTURE and PCA on the simulated data. Models  $k = 2$  and  $k = 3$  are shown. (A) Clustering of individuals following the even sampling strategy. (B) Analysis of the first two PCs of the even sampling strategy. (C) Clustering of individuals following the uneven sampling strategy. (D) Analysis of the first two PCs of the uneven sampling strategy.

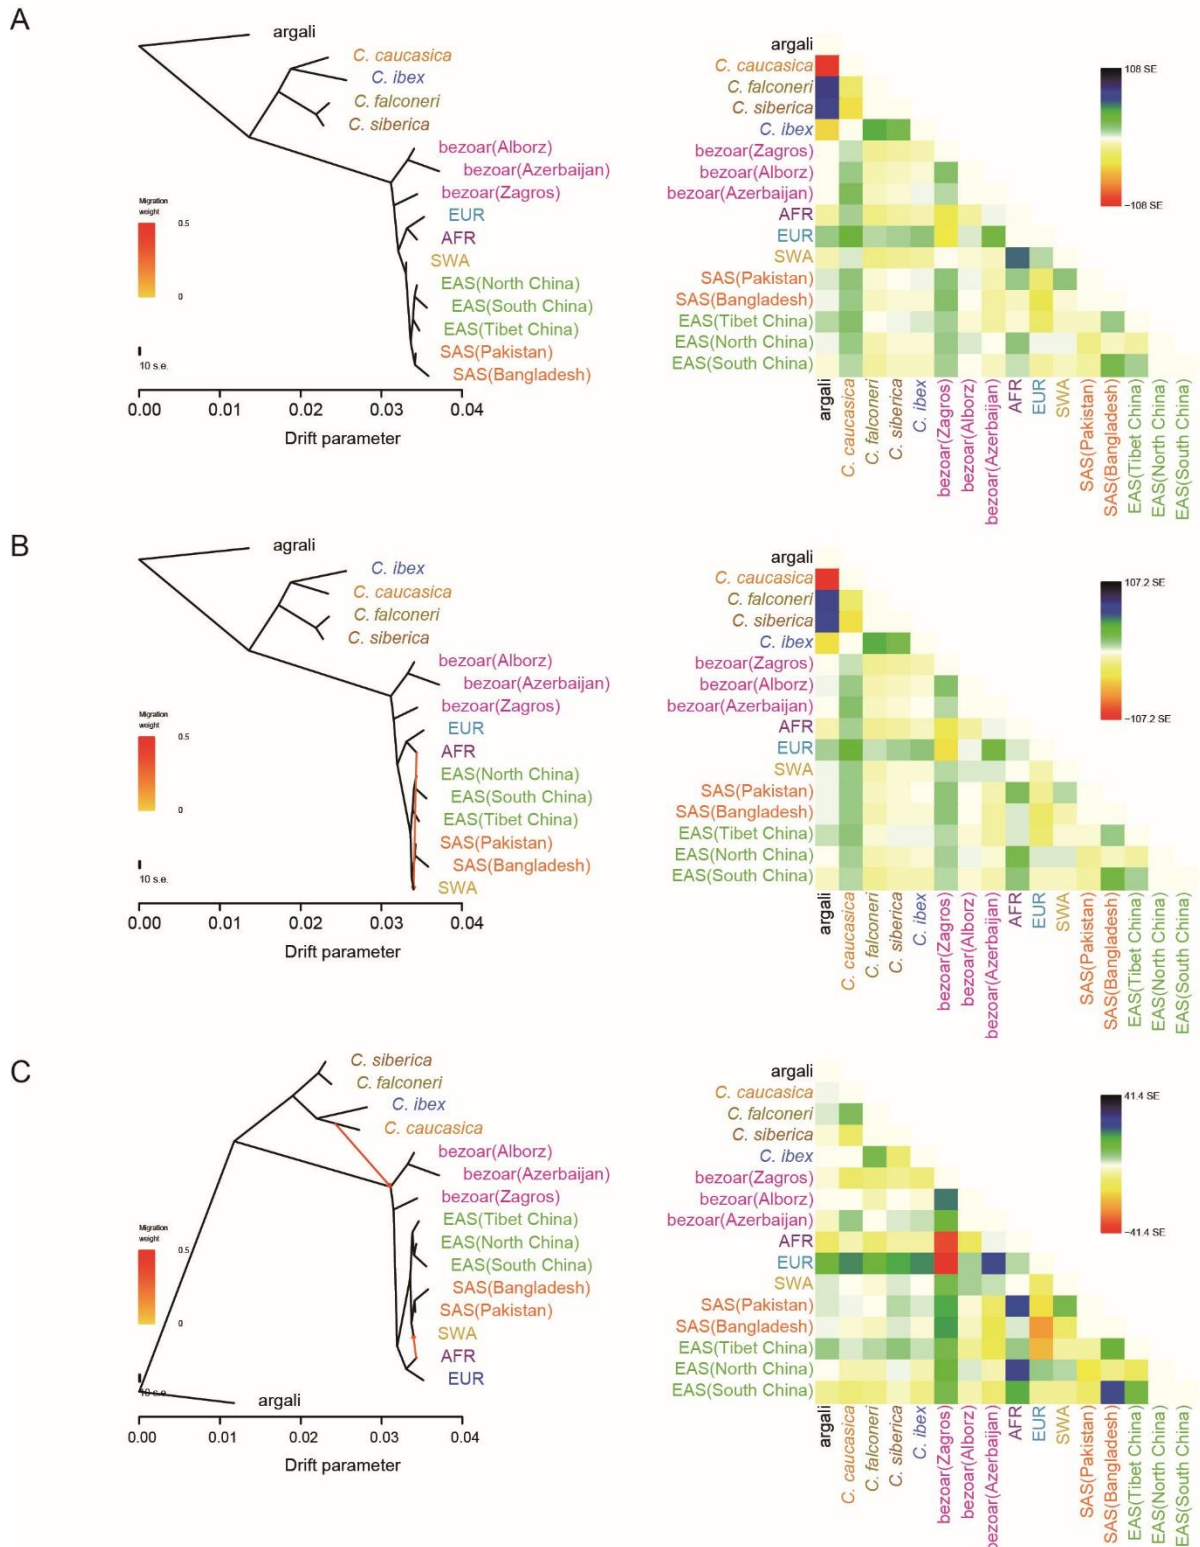

**Fig. S8.** Inference of population splits and mixtures by means of TreeMix. Maximum likelihood (ML) trees (left panel) and corresponding model residuals (right panel). All nodes have 100% support (100 bootstrap replicates). (A) ML tree with no migrations explaining 99.82% of the variance. (B) ML tree with one migration event from AFR to SWA explaining 99.84% of the variance. (C) ML tree with adding a migration event from *C. caucasica* to the node leading to bezoars and domestic goats explaining 99.95% of the variance.

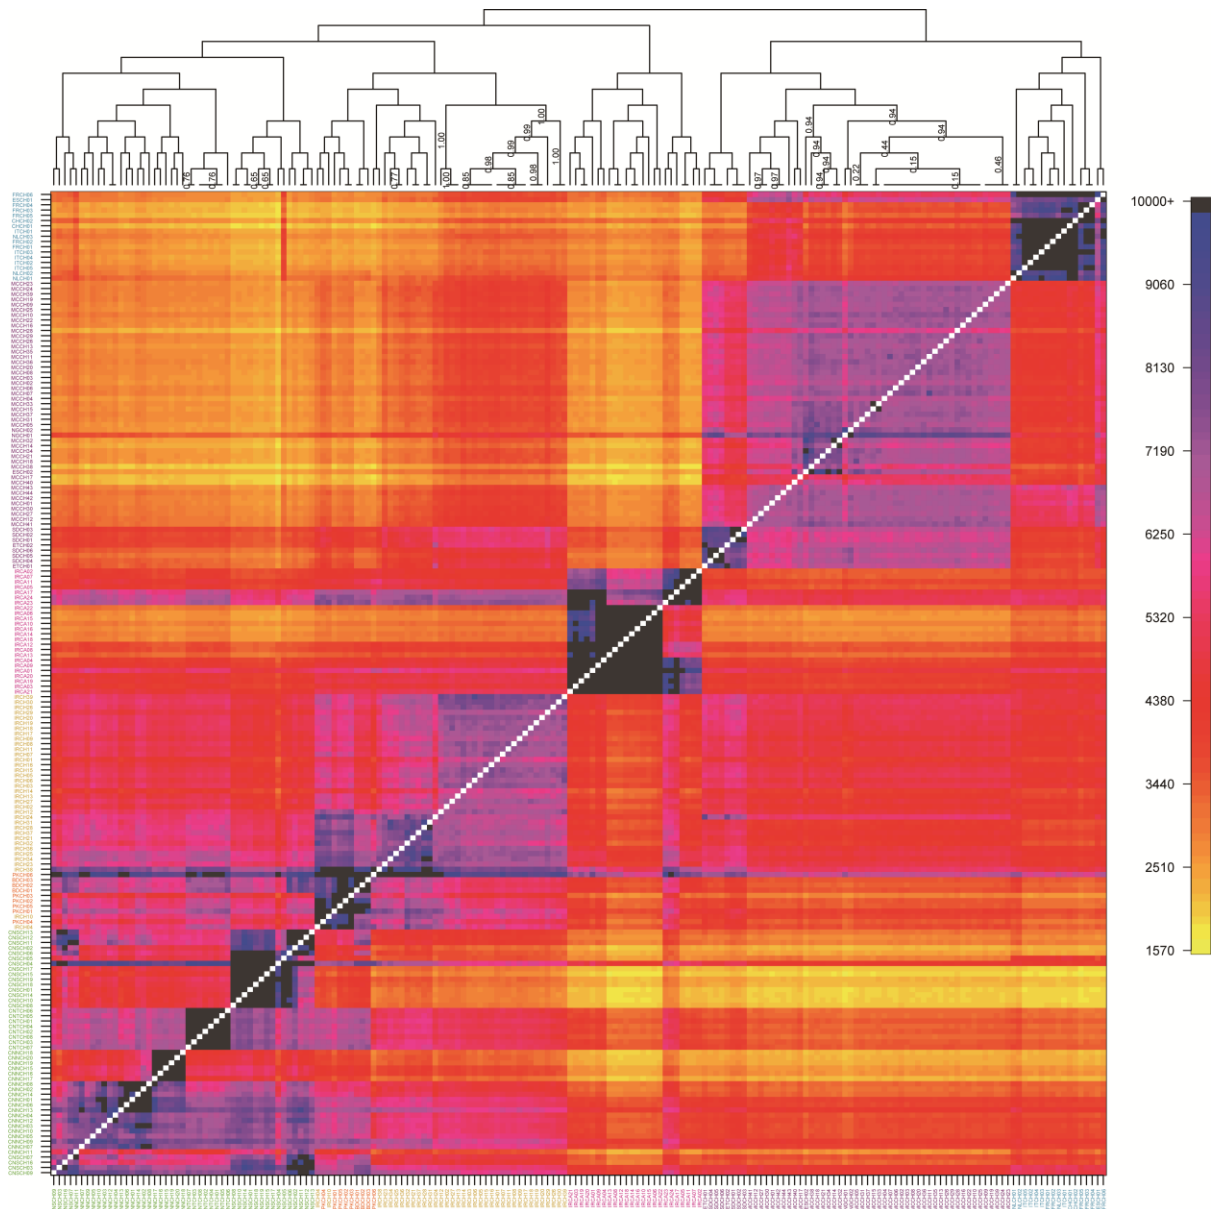

**Fig. S9.**  
**Coancestry heatmap.** ChromoPainter and fineSTRUCTURE results, showing the underlying number of discrete “haplotypes” that an individual (rows) receives from other donor individuals (columns). The dendrogram shows the clustering of the analyzed individuals. There is no underlying historical or evolutionary model assumed by this representation. The numbers on the dendrogram give the proportion of MCMC iterations for which each population split is observed. All the “unreported” values were 1. Darker colors on the heatmap represent greater haplotype sharing. fineSTRUCTURE distinguished between the different populations present in the bezoar population. Further structure mirrored genetic drift in AFR, EUR, SWA, SAS, and EAS.



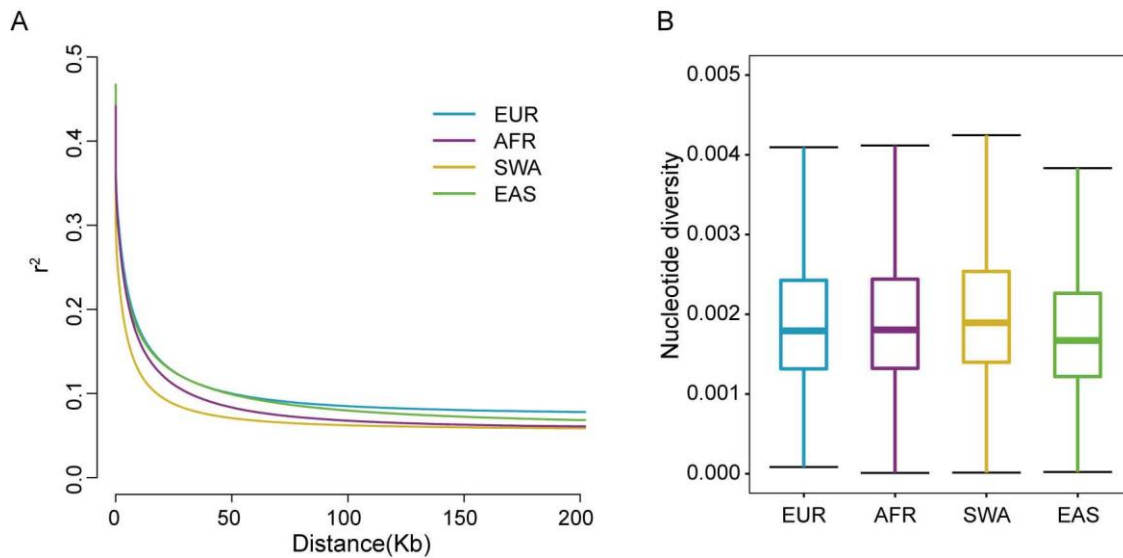

**Fig. S10.** **Linkage disequilibrium decay and genetic diversity of four domestic populations.** For EAS, we consider only samples from South China. **(A)** The decay of linkage disequilibrium measured as the squared correlation coefficient by pairwise physical distance in four domestic populations. To minimize the effect of sample size variation, we randomly reduced the sample size to 16 for each population. **(B)** Boxplots of nucleotide diversity, calculated in 50 kb sliding window with 20 kb increments across the genome.

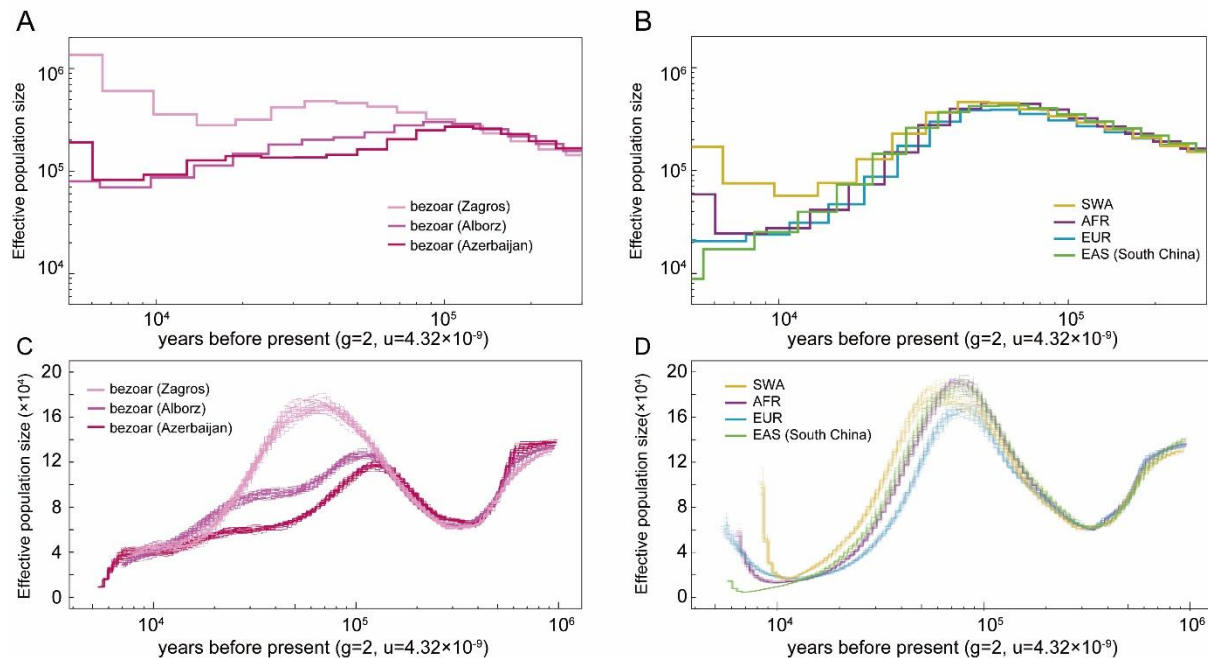

**Fig. S11.** **Inference of population size from whole-genome sequences.** For EAS, we consider only samples from South China. **(A, B)** Effective population size histories estimated using MSMC2 from four haplotypes (two phased individuals) for each of seven populations. **(C, D)** Effective population size histories inferred using SMC++ with 20 bootstrap replicates.

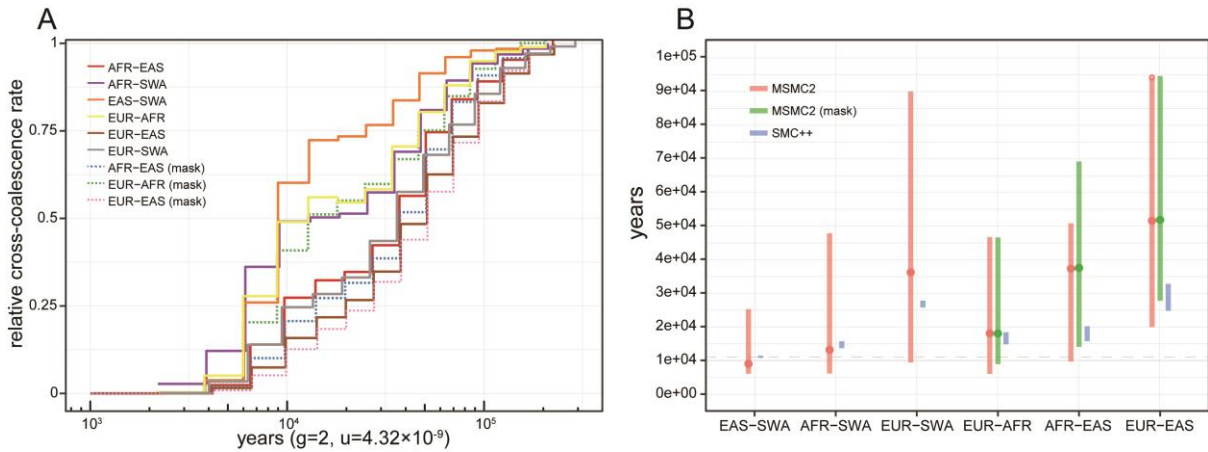

**Fig. S12.**

**Genetic separation between population pairs.** (A) Relative cross coalescence rates between domestic goat populations. Values close to 1 indicate that the two populations have not yet diverged. Values close to 0 indicate that the populations have completely diverged. (B) Split times inferred using MSMC2 and SMC++. The red lines represent the time inferred from MSMC2. The green lines represent the time inferred from MSMC2 after masking out the recent segments of bezoar ancestry. Dots, lower and upper bar represents the time at which cross coalescence rate dropped below, 50%, 25%, and 75% respectively. The blue lines represent the time inferred using SMC++ on 11 genomes per group. The estimation is based on the results of 20 bootstrap sets.

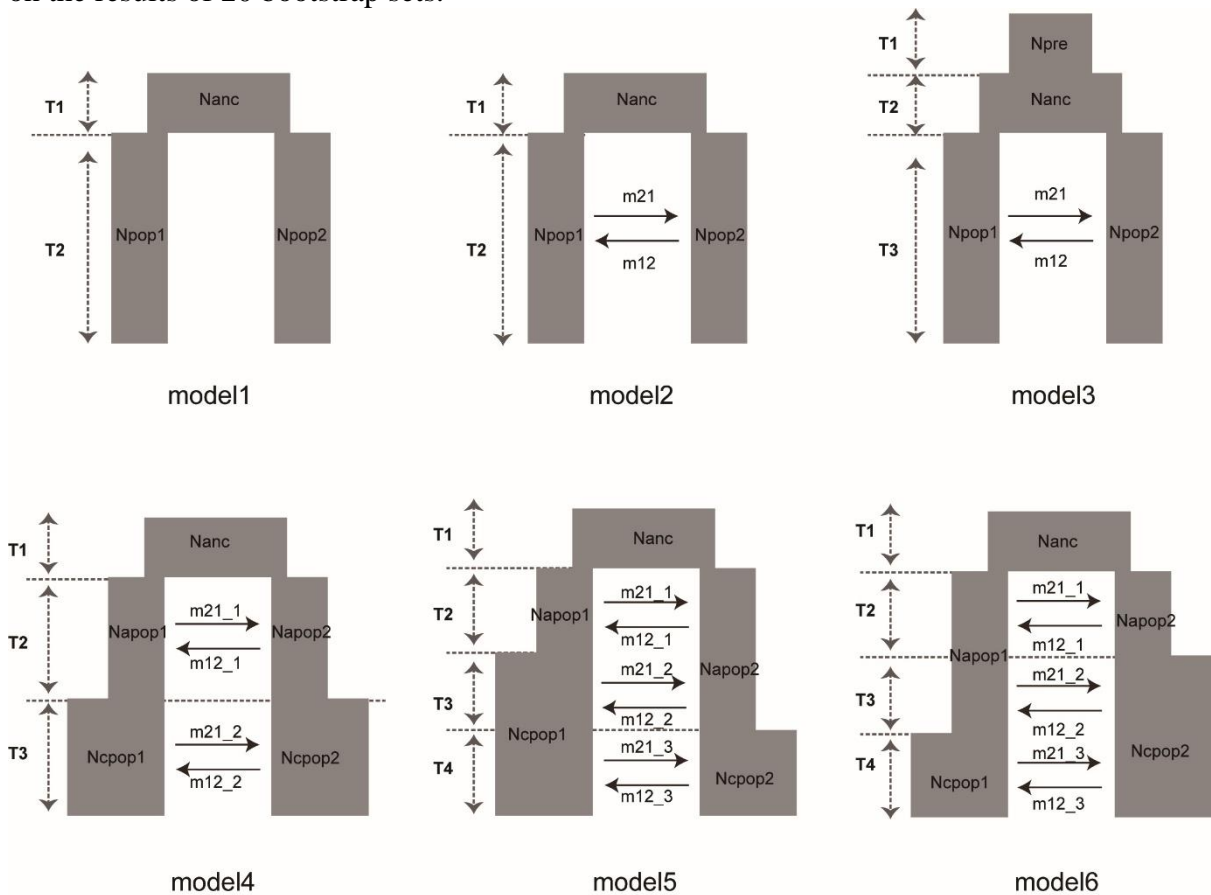

**Fig. S13.**

**Six tested demographic models applied to pairs of populations.** The description of the parameters is given in table S7.

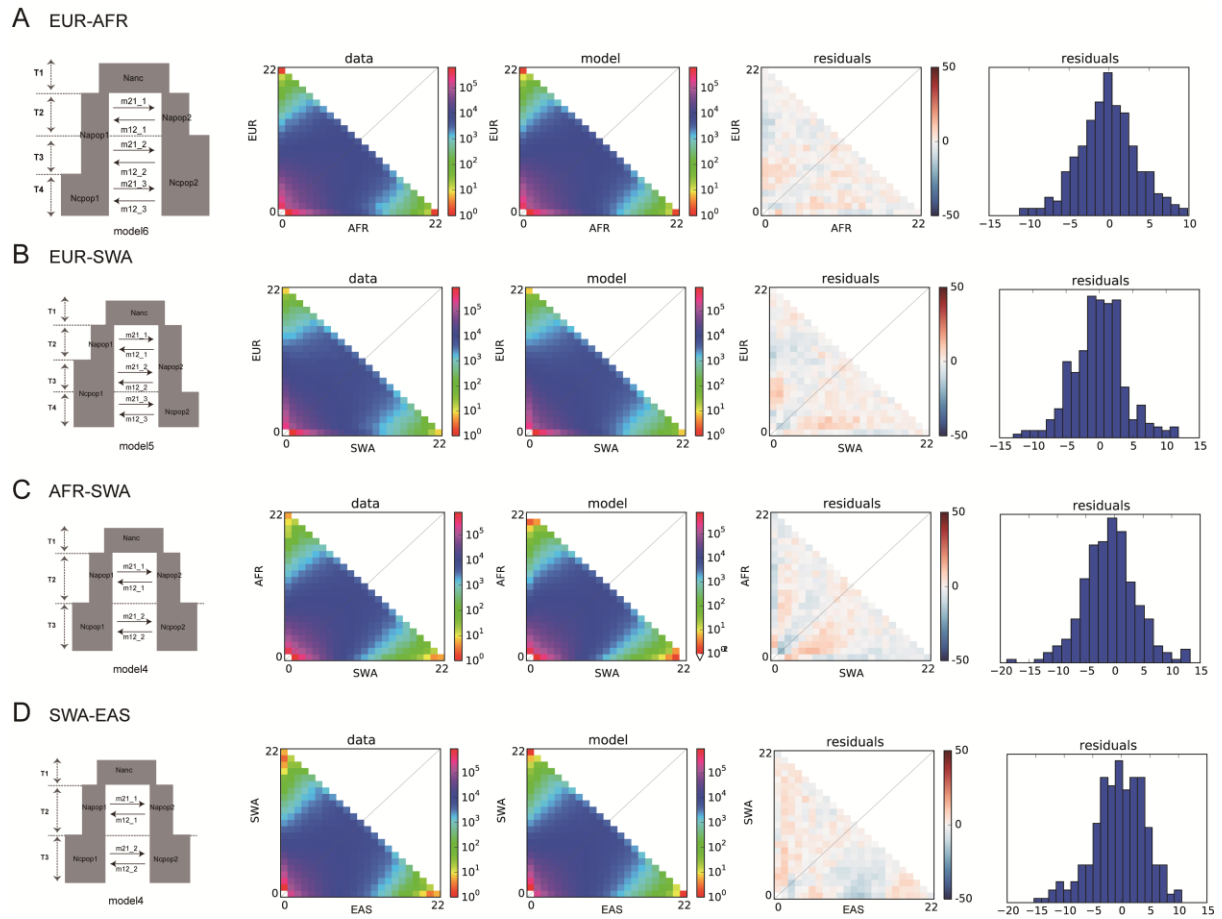

**Fig. S14.**  
**Demographic modeling for pairs of populations. (A)** EUR and AFR. **(B)** EUR and SWA. **(C)** AFR and SWA. **(D)** SWA and EAS. A simplified graphic of the best-fit model is depicted, along with comparisons of the two-dimensional site frequency spectrum for the data, the model and resulting residuals. Parameter values are provided in table S7.

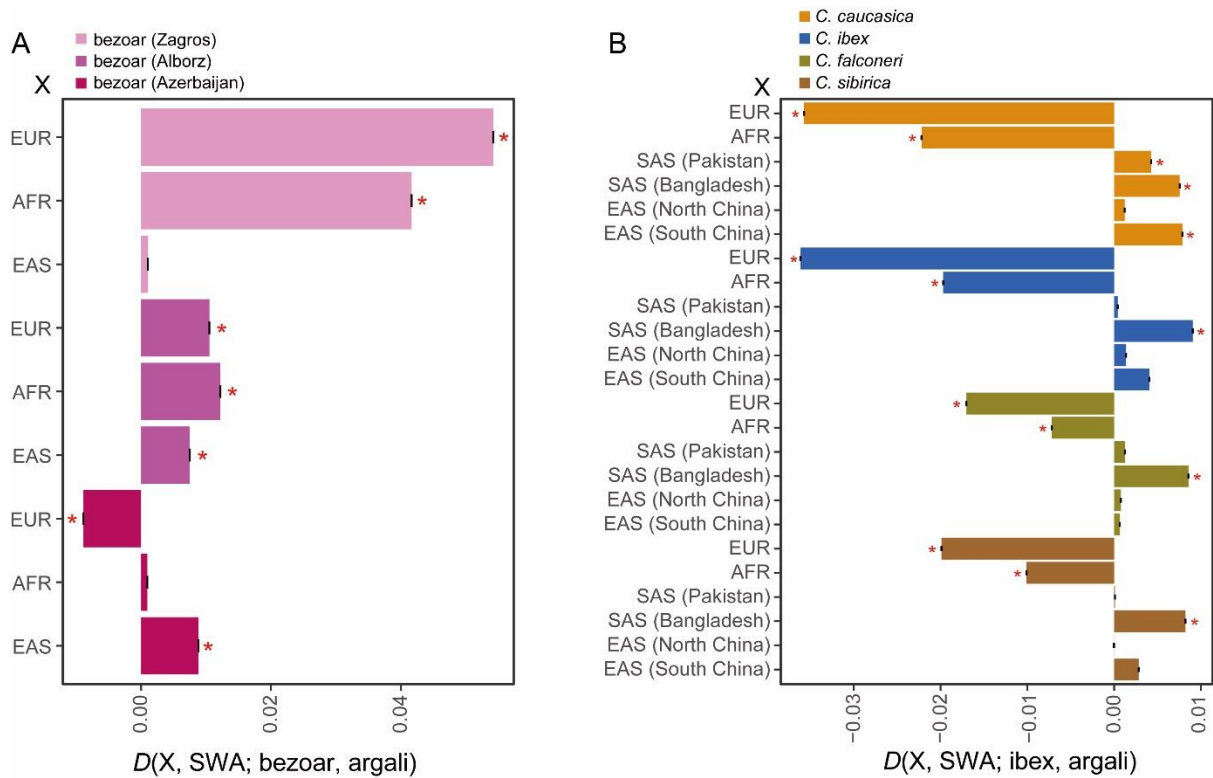

**Fig. S15.**

**Allele sharing between domestic goats and wild goats. (A)** Allele sharing between domestic goats and bezoars. **(B)** Allele sharing between domestic goats and ibex-like species. Statistically significant results, defined by  $|Z\text{-scores}| \geq 3$ , are marked with a red asterisk. Negative values were obtained if wild goats were closer to X, and positive values if wild goats were closer to SWA.



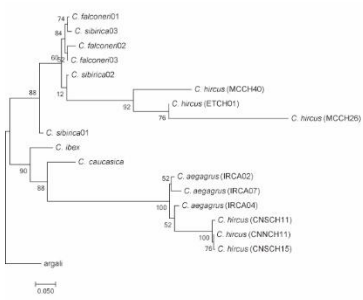

chr2:71,813,208-71,848,112

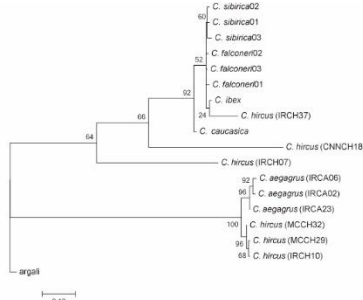

chr2:78,444,113-78,463,513

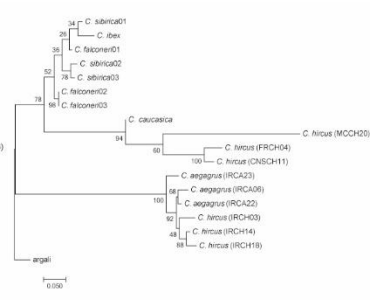

chr2:94,099,862-94,128,976

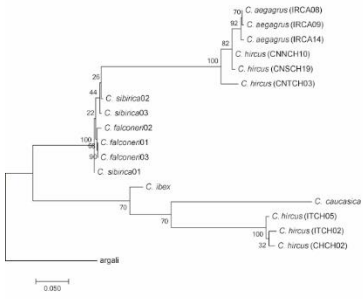

chr3:17,070,266-17,109,926

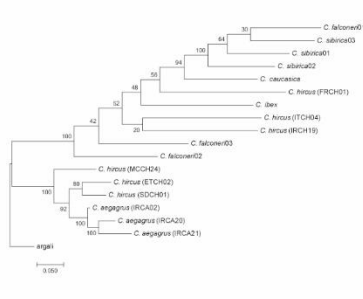

chr3:66,410,139-66,489,579

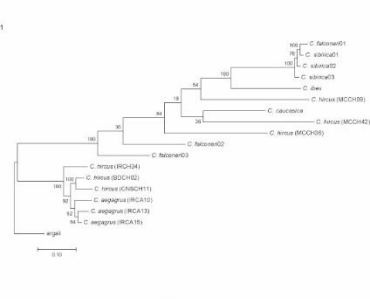

chr3:66,602,349-66,769,681

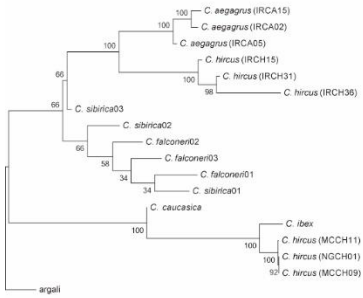

chr3:108,170,029-108,228,388

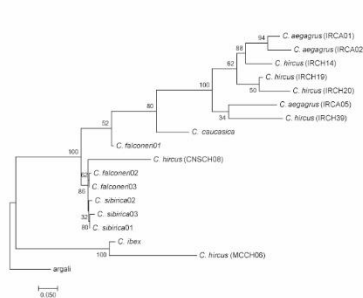

chr3:108,332,708-108,369,750

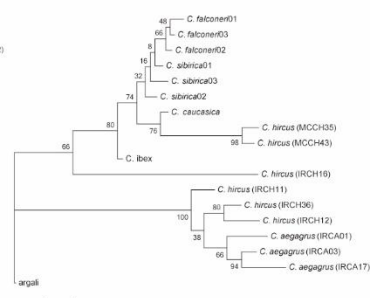

chr3:111,872,072-111,908,509

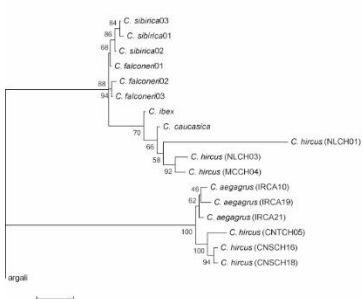

chr4:13,670,435-13,708,894

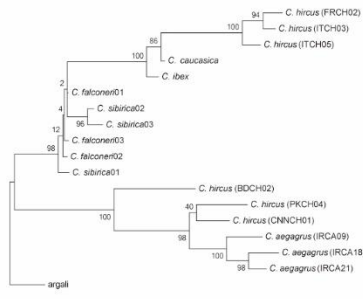

chr4:64,380,436-64,428,804

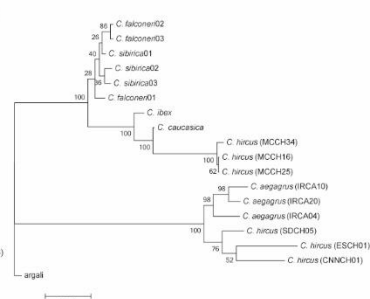

chr4:67,335,251-67,448,678

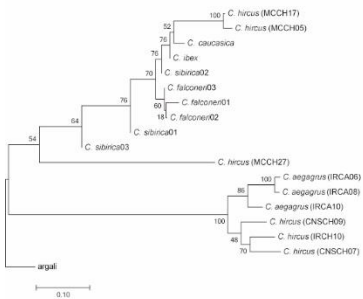

chr4:96,990,515-97,024,836

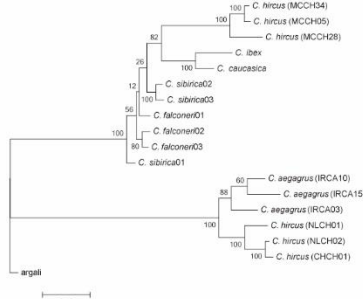

chr5:17,970,193-18,229,602

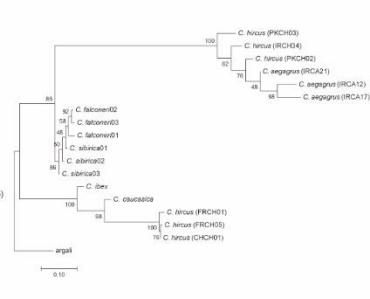

chr5:26,694,246-26,728,907

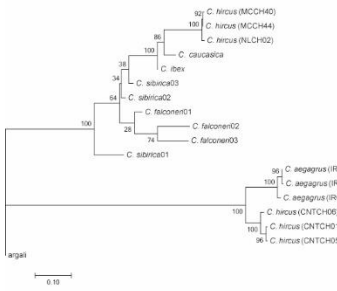

chr5:80,922,357-80,949,324

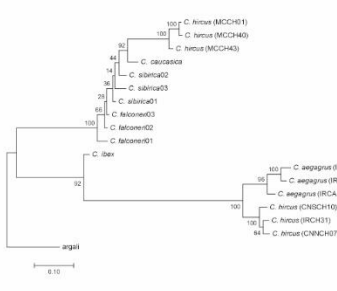

chr5:94,651,258-94,688,986

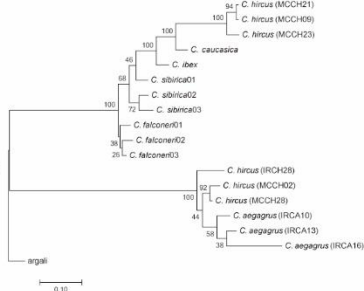

chr5:113,696,707-113,745,333

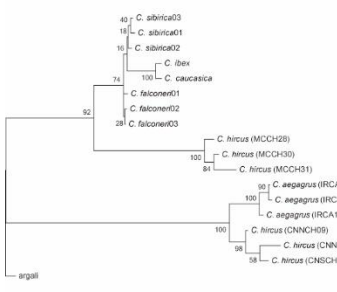

chr5:113,950,174-113,989,981

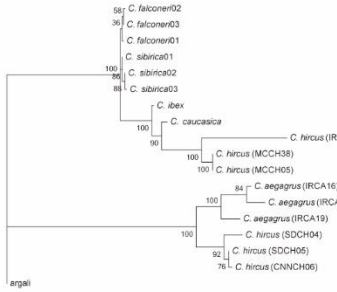

chr6:272,270-308,977

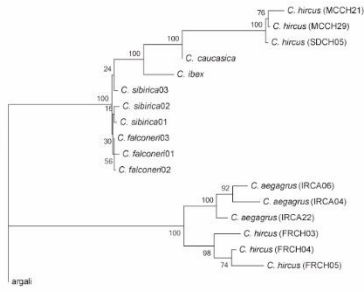

chr6:20,670,803-20,728,594

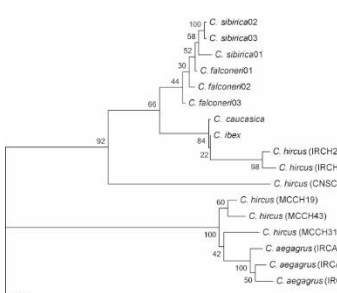

chr6:22,442,060-22,469,629

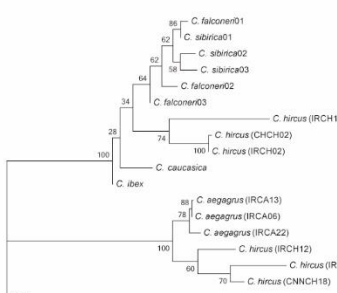

chr6:25,470,827-25,488,484

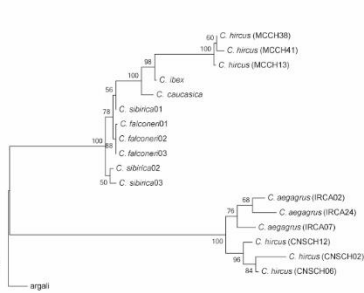

chr6:43,393,606-43,429,852

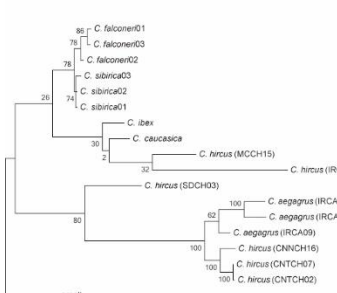

chr6:75,051,577-75,089,711

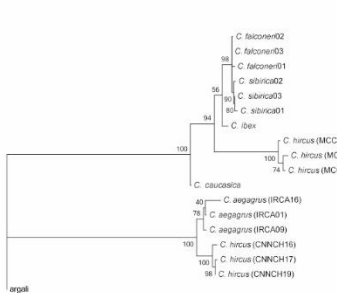

chr6:75,470,180-75,509,529

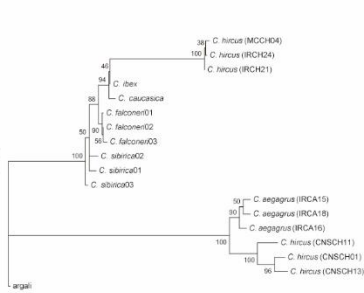

chr6:82,811,688-82,849,638

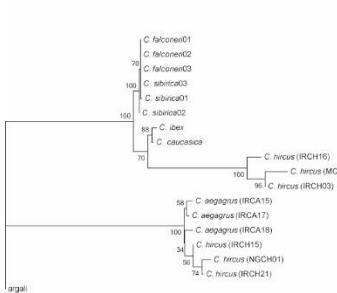

chr6:99,910,923-99,945,299

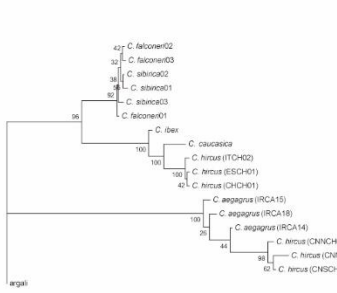

chr6:110,850,109-110,889,975

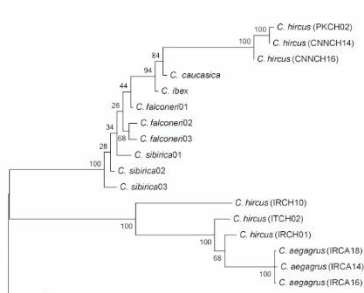

chr7:710,088-749,576

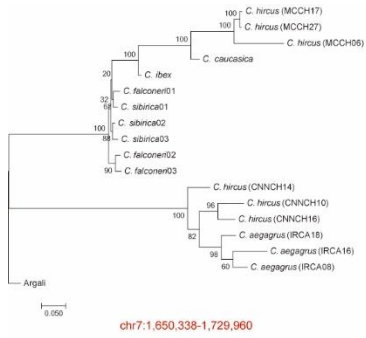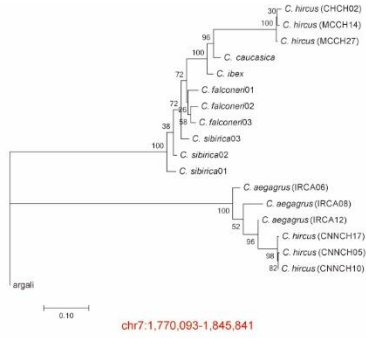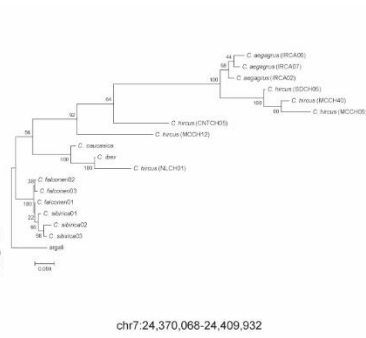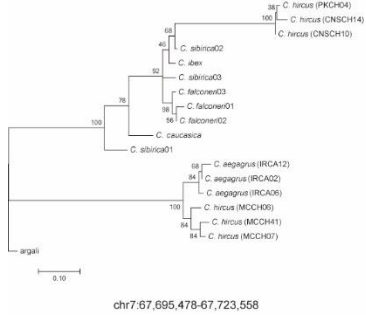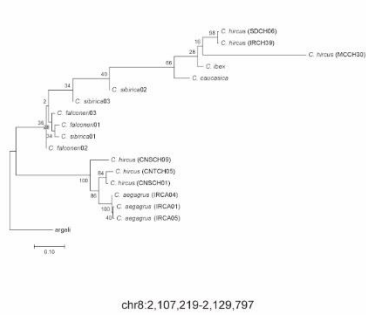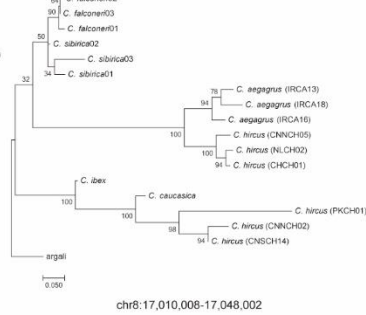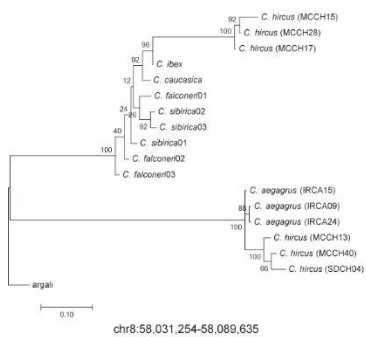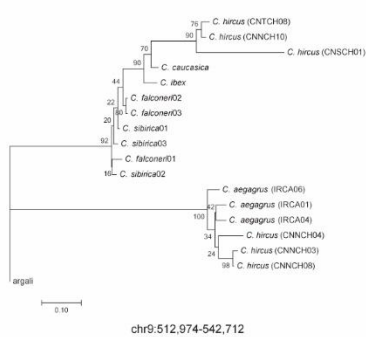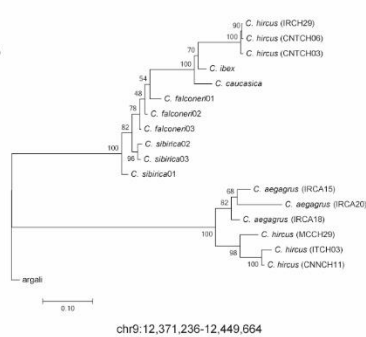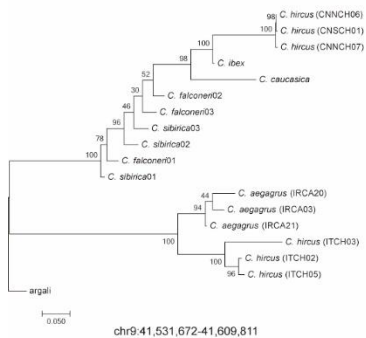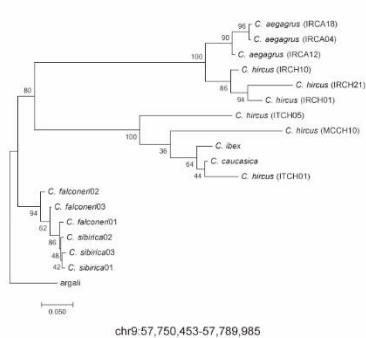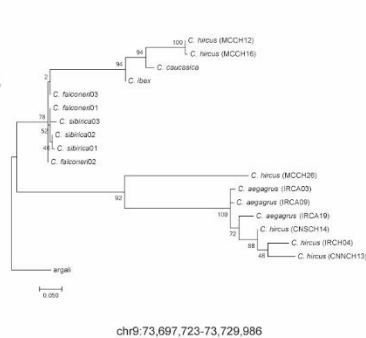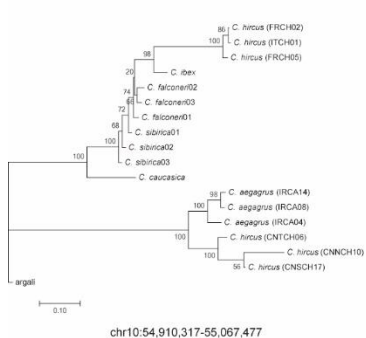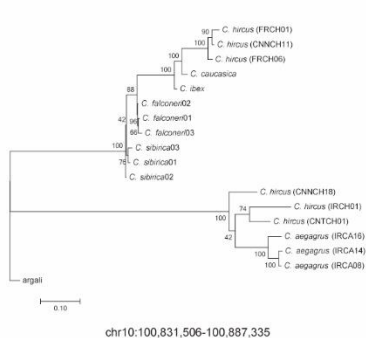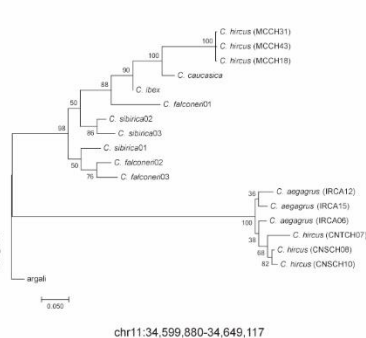



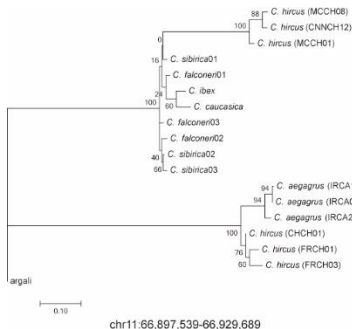

chr11:66,897,539-66,929,689

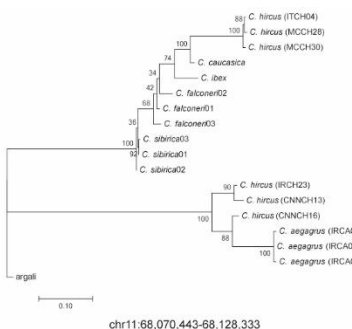

chr11:68,070,443-68,128,333

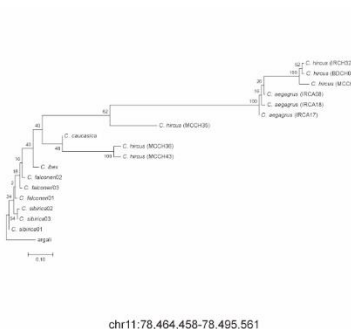

chr11:78,464,458-78,495,561

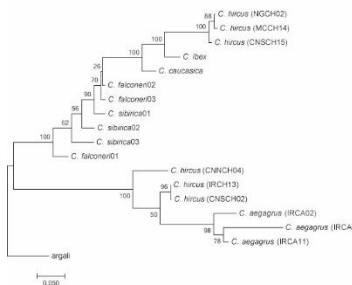

chr12:28,170,650-28,225,631

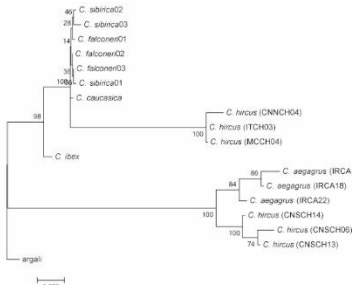

chr12:44,850,093-44,889,747

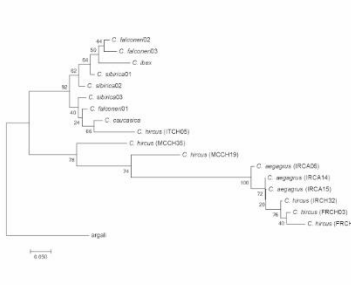

chr12:54,130,985-54,172,473

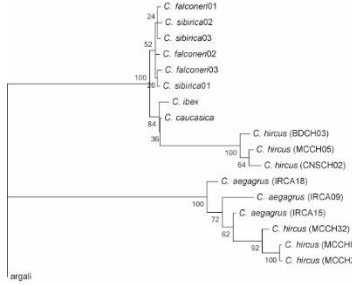

chr12:79,110,590-79,168,979

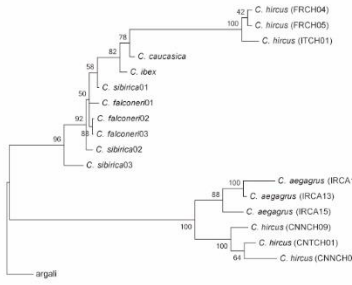

chr12:83,010,911-83,068,040

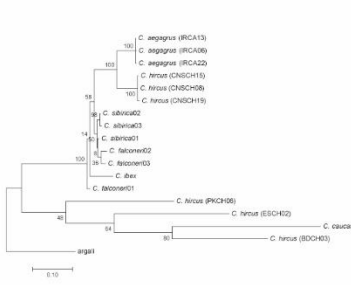

chr13:66,710,508-66,749,824

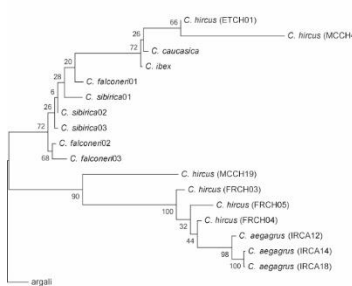

chr14:48,611,708-48,647,670

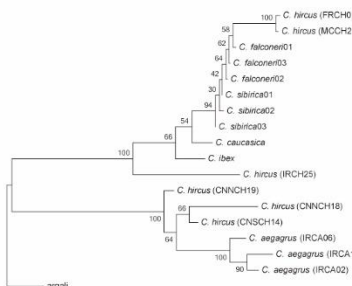

chr14:77,550,799-77,586,679

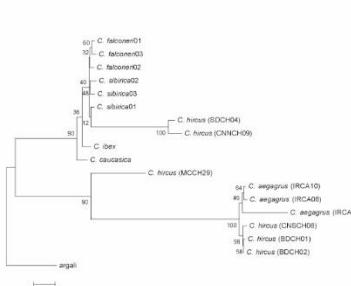

chr14:84,877,876-84,909,025

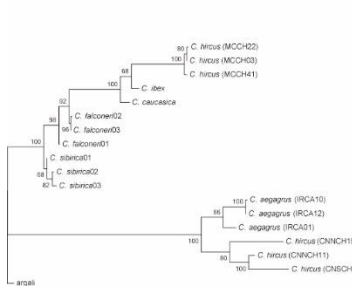

chr14:86,957,811-86,989,811

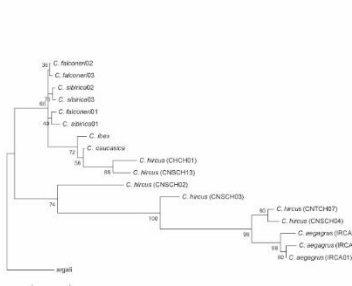

chr15:55,370,161-55,409,396

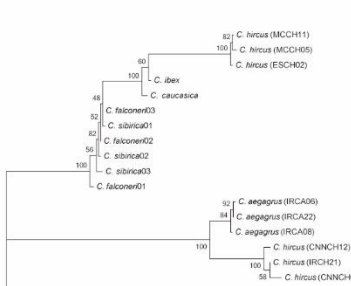

chr15:59,956,713-59,996,288

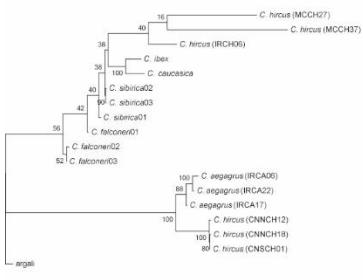

chr15:71,070,083-71,109,191

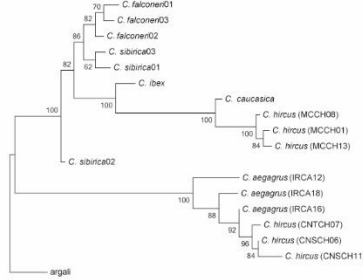

chr15:73,690,525-73,729,917

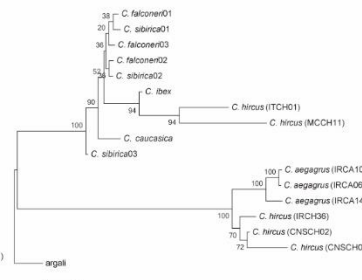

chr16:7,950,015-7,989,109

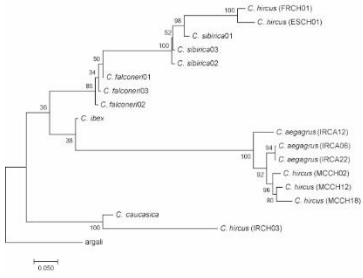

chr16:10,590,301-10,708,790

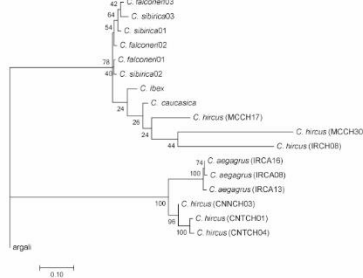

chr16:55,795,461-55,829,191

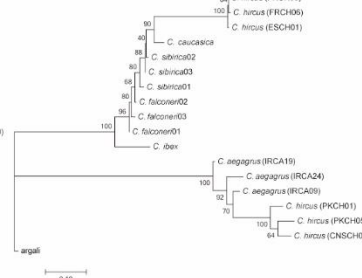

chr17:46,651,112-46,692,346

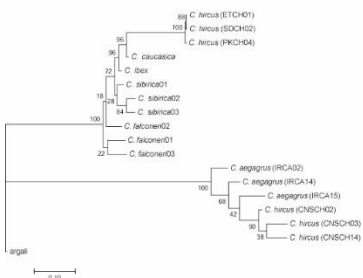

chr18:26,994,268-27,046,087

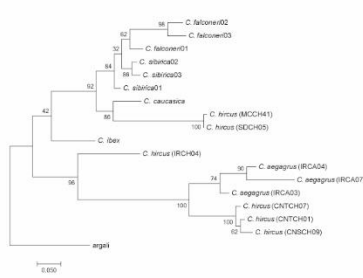

chr18:51,711,061-51,749,510

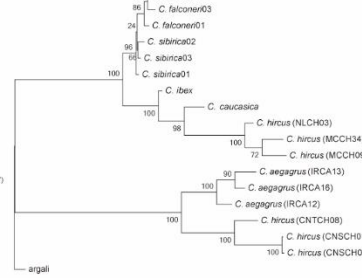

chr19:13,575,349-13,629,669

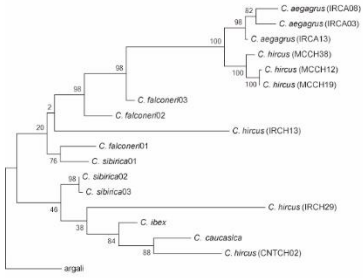

chr20:15,770,044-15,799,982

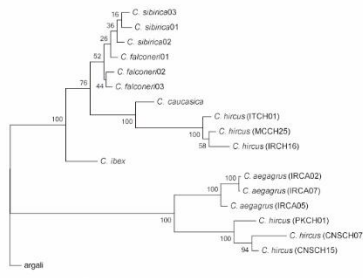

chr20:31,710,371-31,844,323

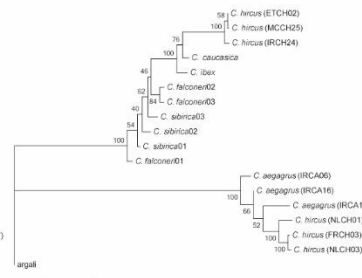

chr20:34,450,869-34,486,606

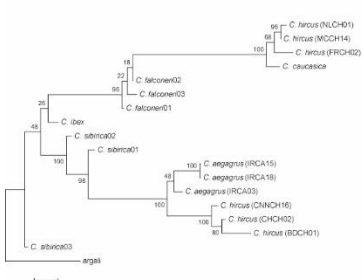

chr20:37,853,810-37,887,311

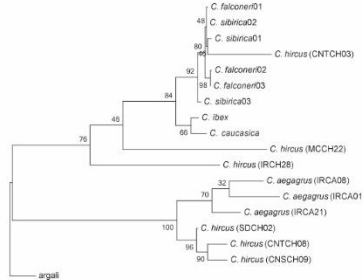

chr20:43,010,176-43,047,836

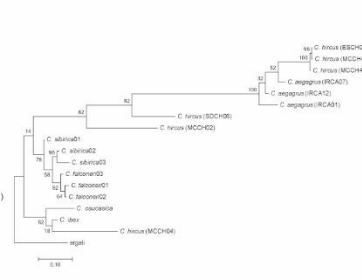

chr20:64,770,119-64,809,512

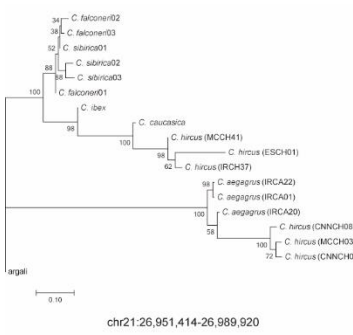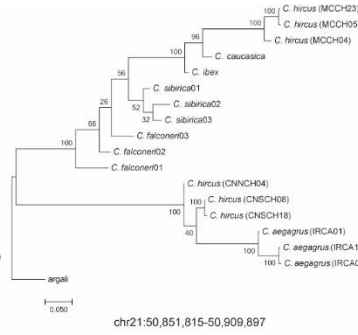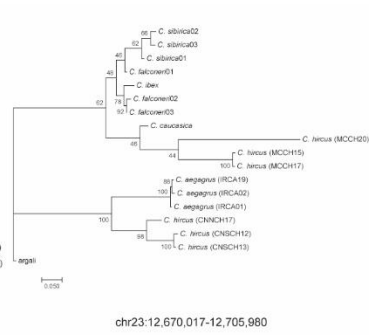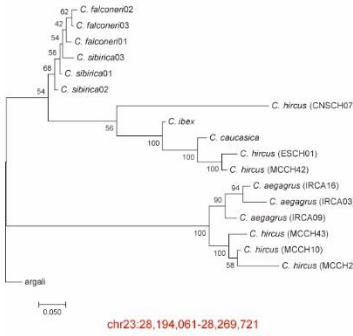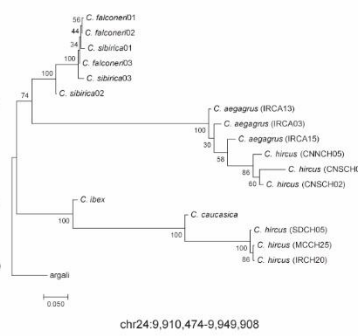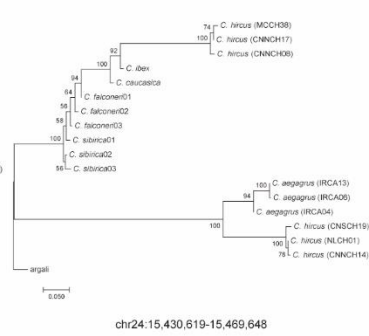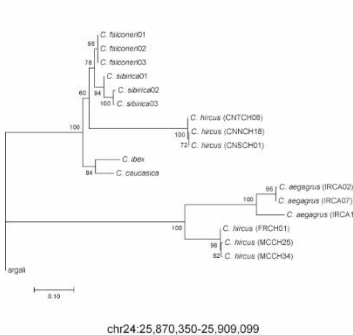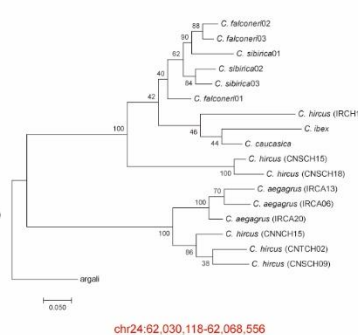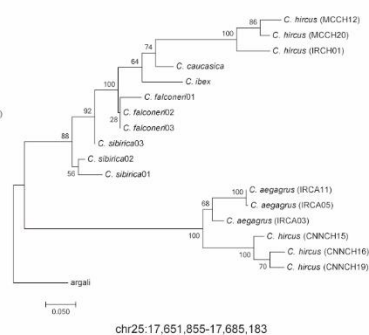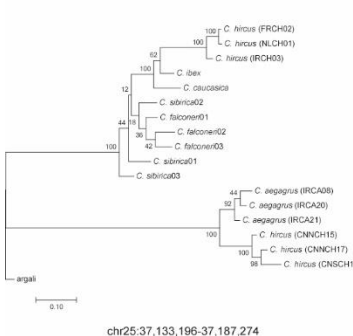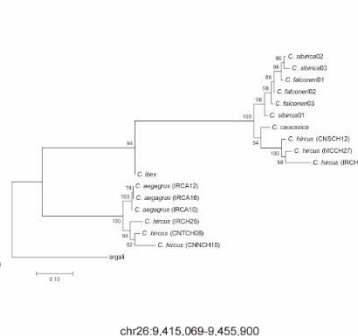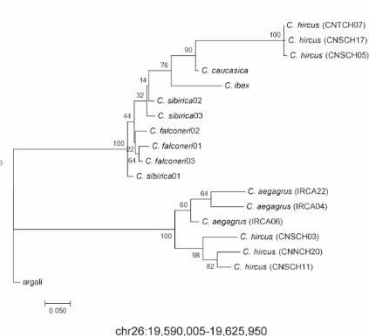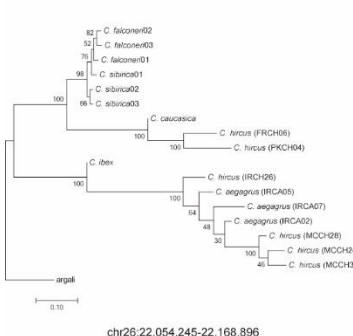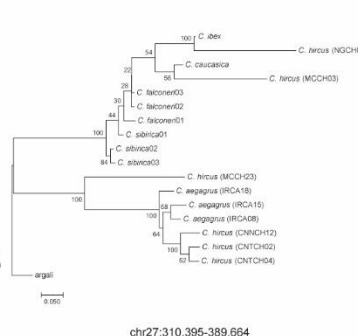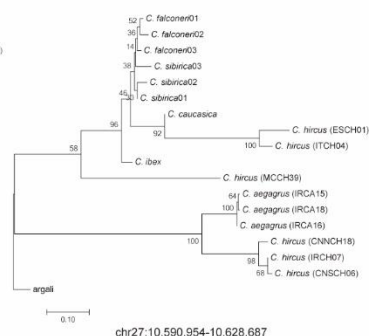

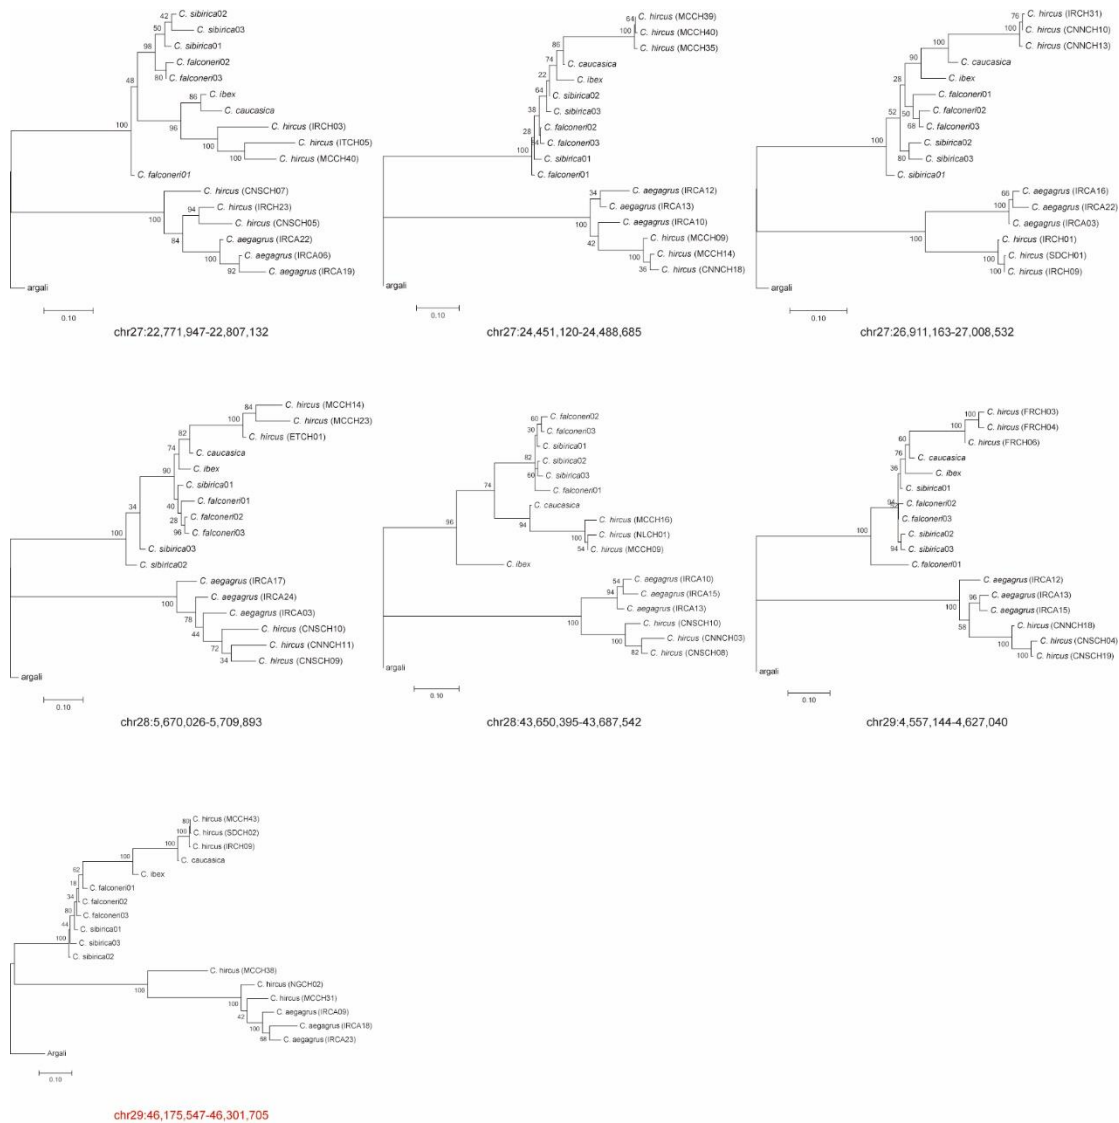

**Fig. S16.**

**Phylogenetic trees were built using pseudo-haplotypes covering the candidate introgressed regions (Data file S1). The pseudo-haplotype was created by randomly calling one allele at the polymorphic sites in ibex-like species and bezoar-goat branch. The immune-related loci are highlighted by red color.**

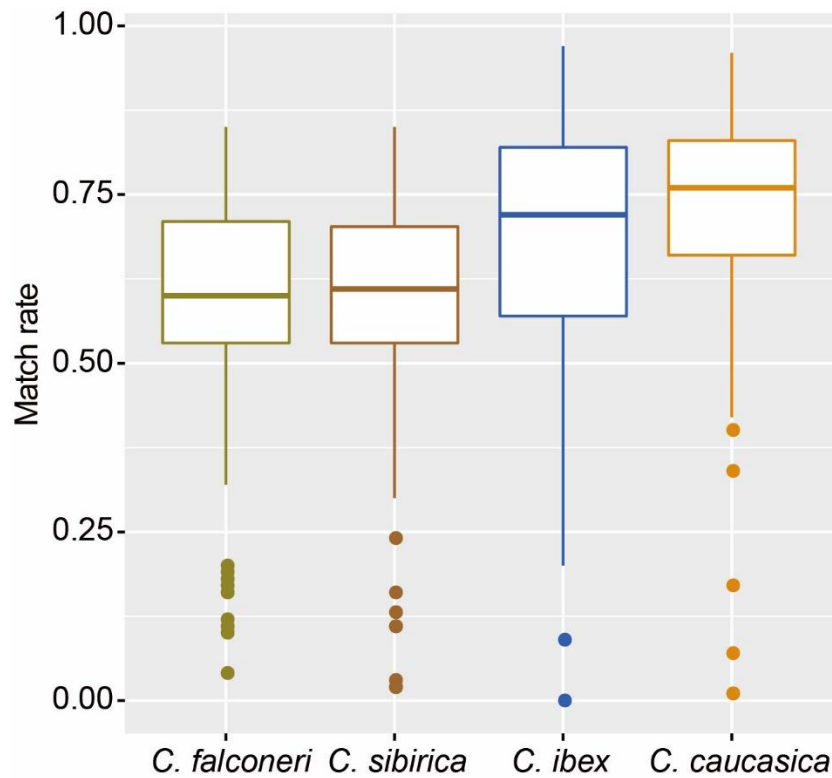

**Fig. S17.**

**The distribution of match rates of the 112 putative introgressed segments to ibex-like genomes.** For *C. sibirica* and *C. falconeri*, the averaged match rates are shown (see also Data file S1). Rates of matching of putatively introgressed alleles to ibex-like genomes indicate the degree of divergence between the introgressing and sequenced ibex-like individuals. Match rates suggest that *C. caucasica* shows the highest similarity with the introgressed alleles among the four ibex-like species.

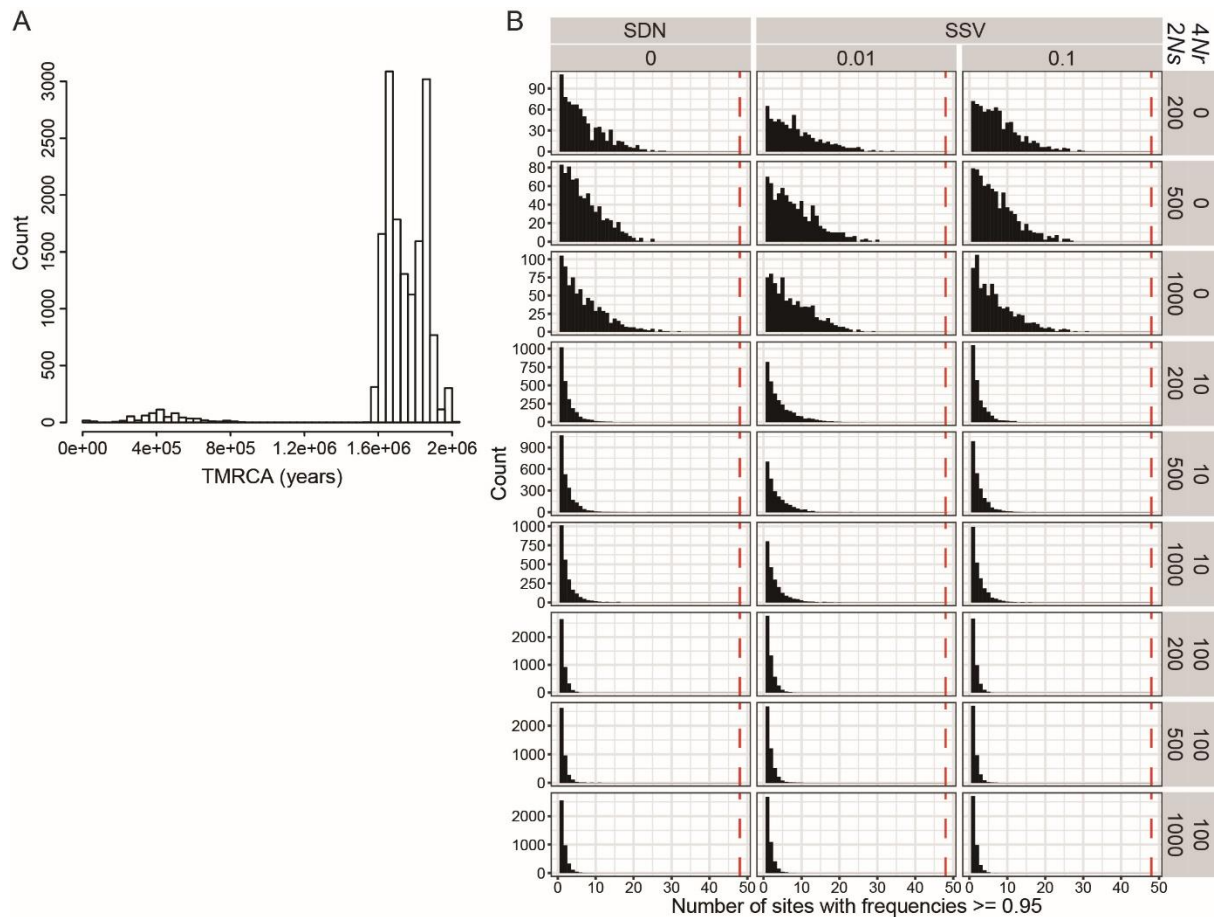

**Fig. S18.** **Introgression may be responsible for the divergent haplotype in the *MUC6* locus.** **(A)** Distribution of the time to the most recent common ancestor (TMRCA) for all possible pairwise haplotypes between modern bezoars and domestic goats covering the non-repeated region (29:46,258,000-46,268,000) of *MUC6*. **(B)** Distribution of highly differentiated sites observed under two assumed selection models, selection on a *de novo* mutation (SDN) and selection on standing variation (SSV). The initial frequencies of the selected allele in the SSV model are 1% and 10%. Each row of panels corresponds to the combination of the different selection strengths ( $2Ns$ ) from 200 to 1,000 and different recombination rates ( $4Nr$ ) from 0 to 100. The red dashed lines mark the number of highly differentiated sites observed in the real data across the non-repeated region of *MUC6*.

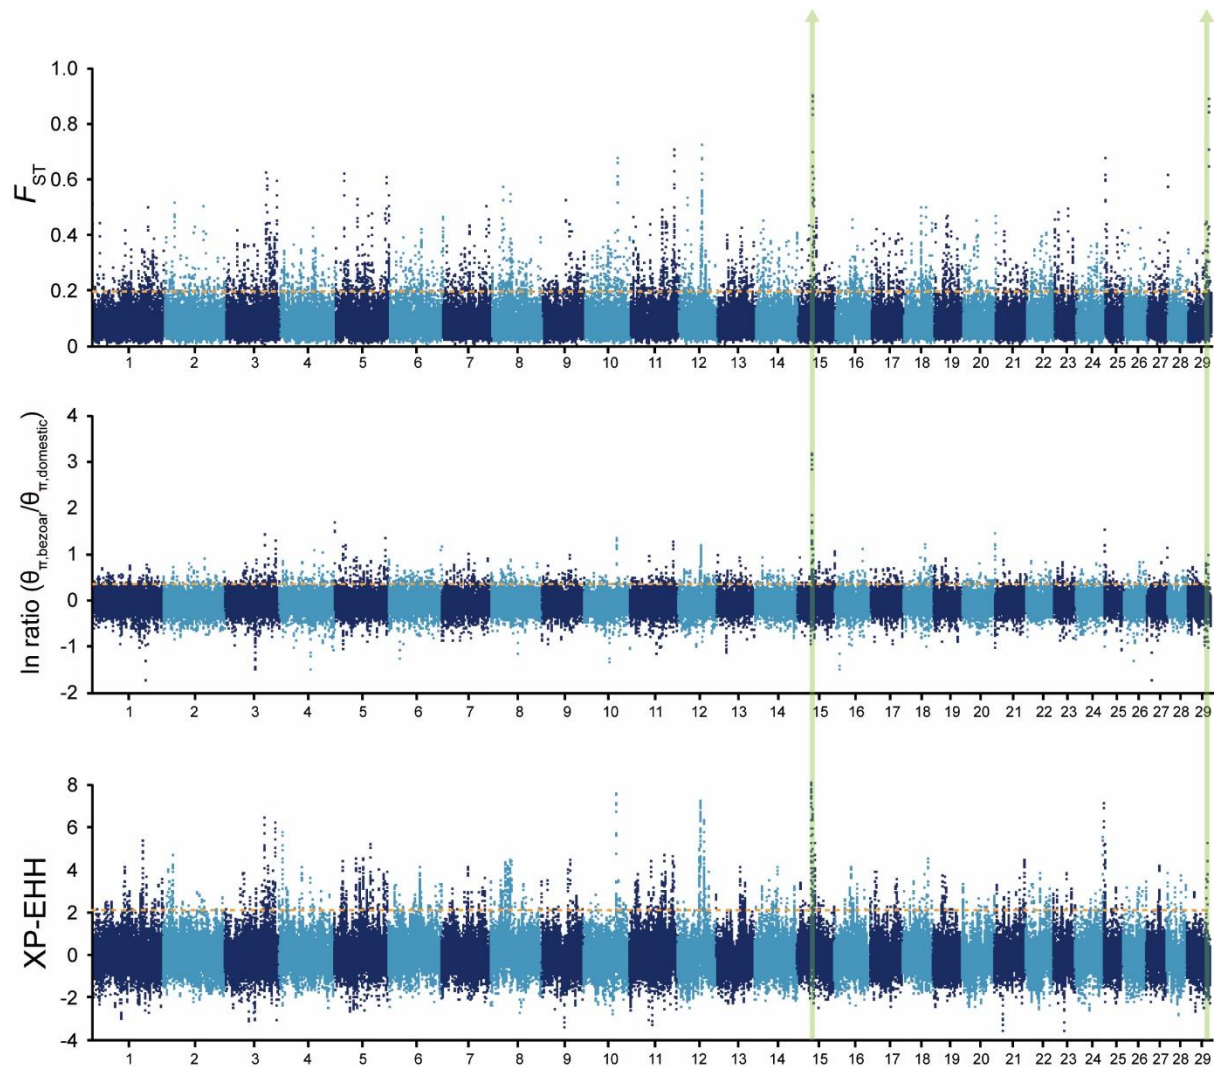

**Fig. S19.**

**Selective sweep analysis by comparing genomes between bezoars and domestic goats.**

Pairwise fixation index ( $F_{ST}$ ) (top panel),  $\pi$   $\ln$  ratio (middle panel) and normalized XP-EHH scores (bottom panel) calculated between bezoars and domestic goats in a 50 kb sliding window with a 20 kb step across all autosomes. The dashed horizontal lines indicate the significance threshold (corresponding to Z test  $P < 0.005$ , where  $F_{ST} > 0.195$ ,  $\pi$   $\ln$  ratio  $> 0.395$  and XP-EHH  $> 2.1$ ) used for extracting outliers. Two loci with the highest  $F_{ST}$  are highlighted by a shaded green column on chromosome 15 and 29.

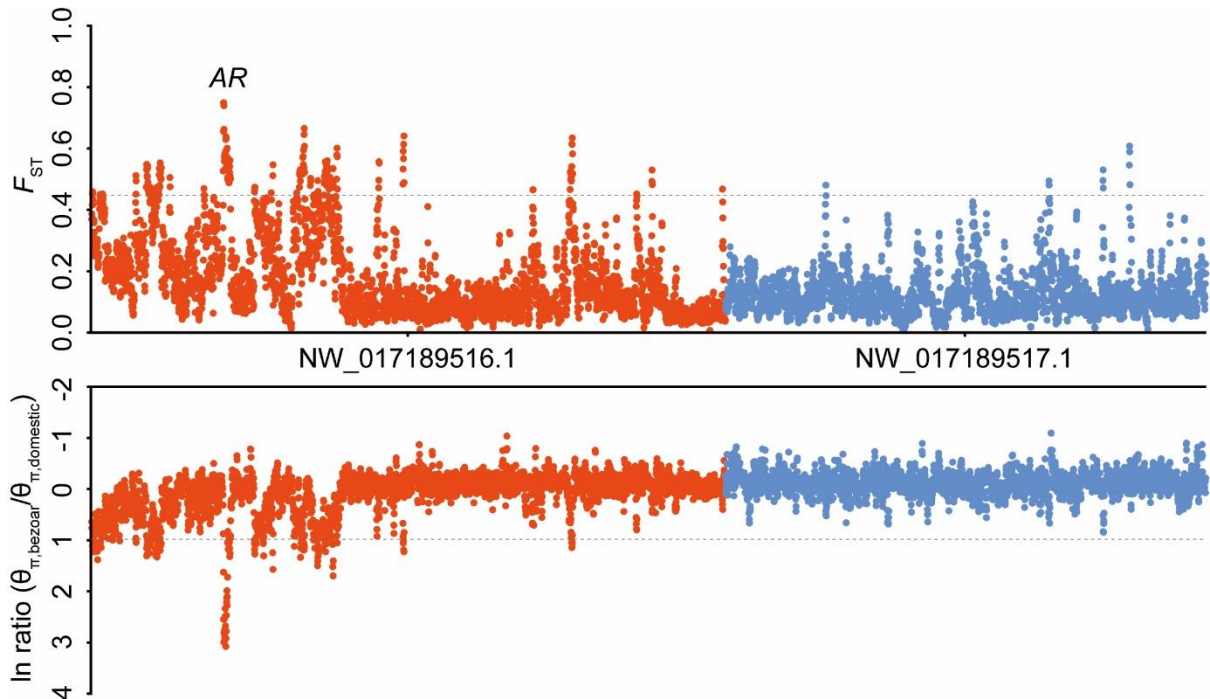

**Fig. S20.**  
**Distribution of  $F_{ST}$  and  $\ln(\theta_{\pi}$  ratio) between bezoars and domestic goats across chromosome X.** Dashed horizontal lines show  $F_{ST} > 0.448$  and  $\ln(\theta_{\pi}$  ratio)  $> 0.981$ , respectively. Genes residing in the top one window are indicated by their symbols.

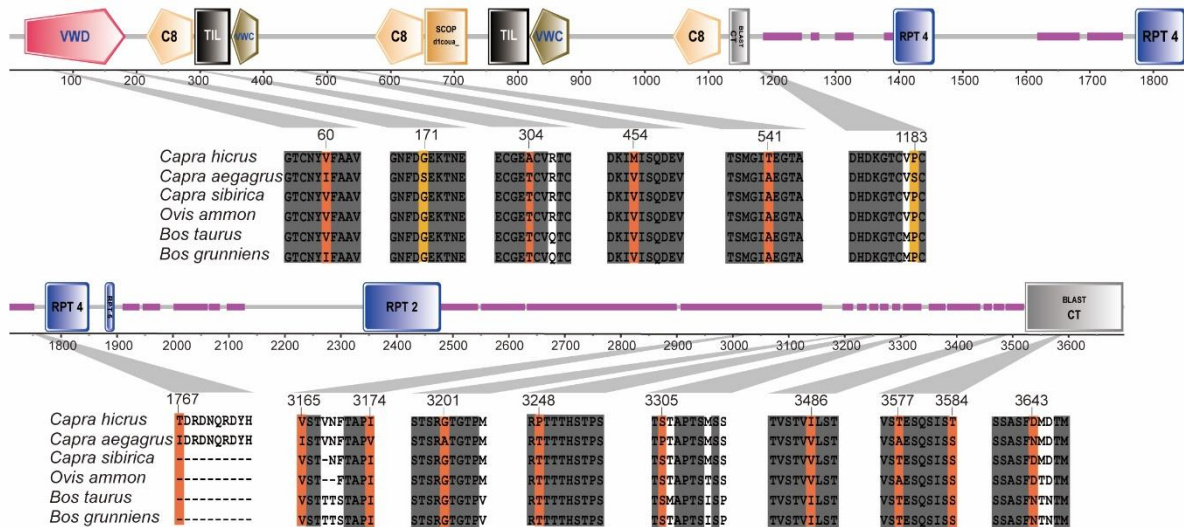

**Fig. S21.**  
**Schematic representations of the domain architecture of the MUC6 protein produced using SMART (117).** Purple lines show low-complexity segments, and regions of protein without any predicted features are marked with gray bars. The lower panel displays the amino acid sequence alignment of MUC6. The orange and yellow shadows highlight the 16 highly differentiated missense mutations in the bezoar-domestic comparison. The yellow shadows indicate two deleterious mutations discovered by Ensembl VEP tool.



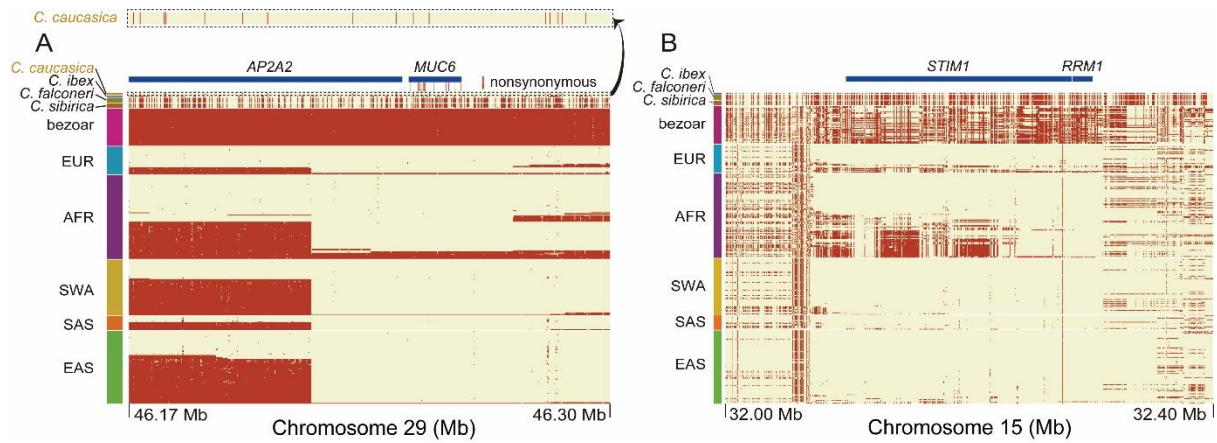

**Fig. S22.**  
**Characterization of the genomic regions exhibited strong selective sweep signals. (A)** Haplotype pattern at the *MUC6* locus defined by putatively introgressed variants (yellow, predicted introgressed allele; red, predicted non-introgressed allele). **(B)** The degree of haplotype sharing across the goat population at the *STIM1-RRM1* locus. The reference/alternative allele is indicated in light yellow/red.

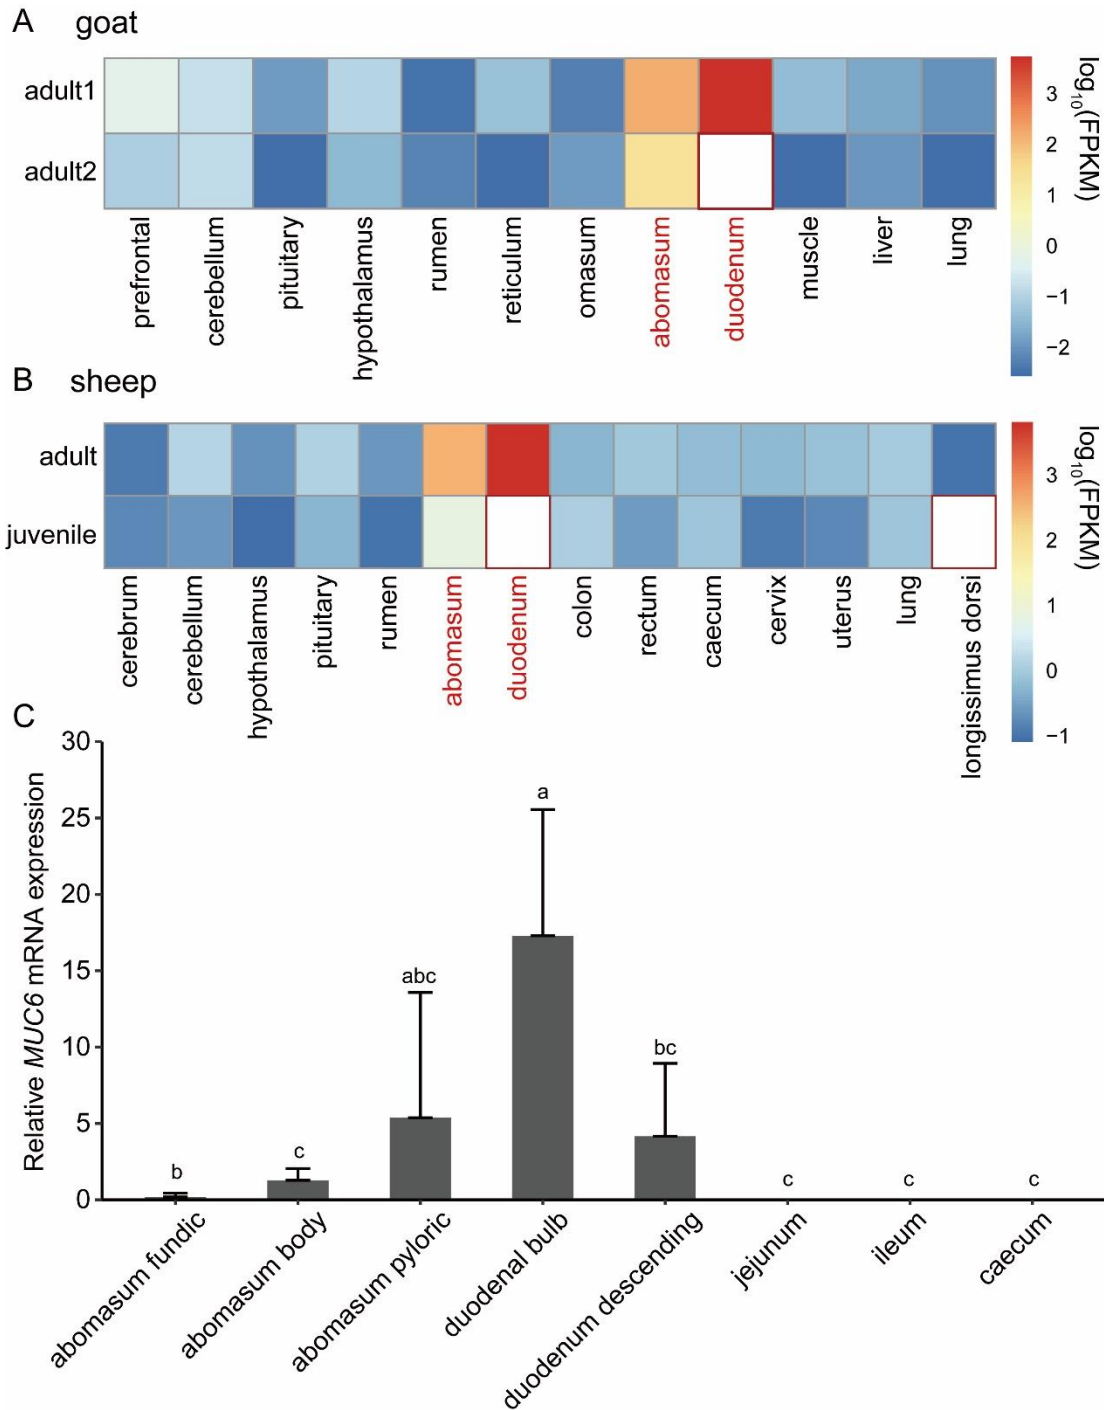

**Fig. S23.**

**Expression analysis of *MUC6* gene.** (A and B) *MUC6* is expressed across different tissues and is specific and highly expressed in the duodenum and abomasum in goat (A) and sheep (B) (118). Cells surrounded by a red frame indicate missing samples. (C) q-PCR analysis of goat *MUC6* expression in the gastrointestinal tract. Error bars represent the standard deviations (n = 3). Different letters represent statistically significant differences between tissues (One Way ANOVA post-hoc tests (Dunnett's T3),  $P < 0.05$ ).



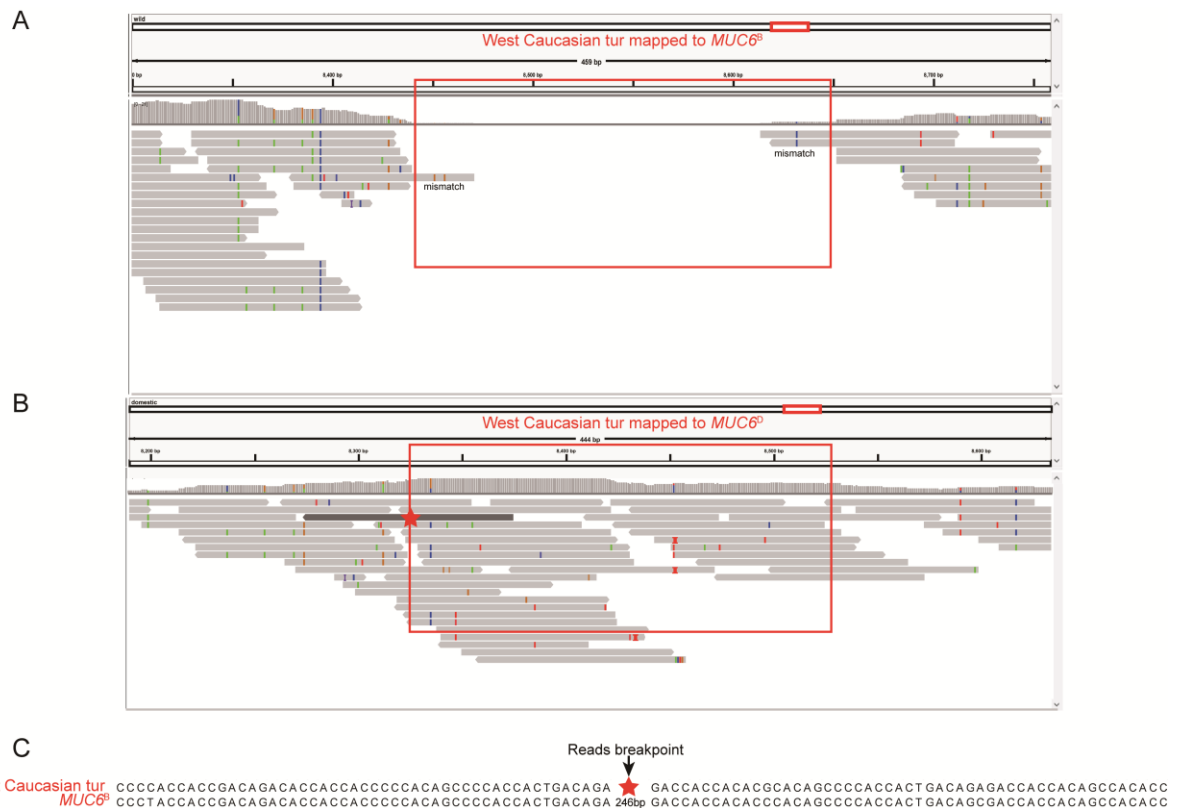

**Fig. S25.**  
**The 246 bp deletion of *MUC6<sup>D</sup>* in West Caucasian tur.** IGV snapshot showing West Caucasian tur reads mapped to (A) *MUC6<sup>B</sup>* mRNA sequence with no reads mapping to the 246 bp deletion except three reads with mismatches (B) *MUC6<sup>D</sup>* mRNA sequence and the reads with no mismatch could across the boundary of the deletion was filled dark grey. The red rectangular circled the region of the 246 bp deletion. (C) We further checked the West Caucasian tur reads by aligning it to *MUC6<sup>B</sup>* mRNA sequence by MEGA6 and the red star pointed the position of the breakpoint.

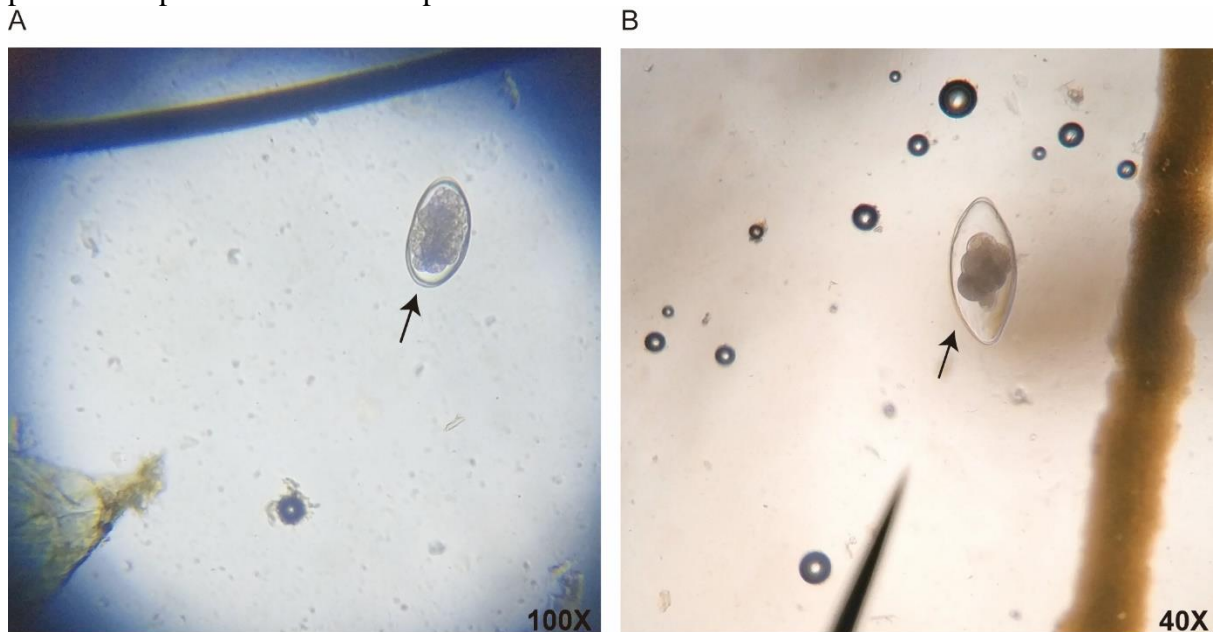

**Fig. S26.**  
**Common gastrointestinal nematode eggs in the trial.** (A) *Hemonchus contortus* and (B) *Nematodirus* sp.

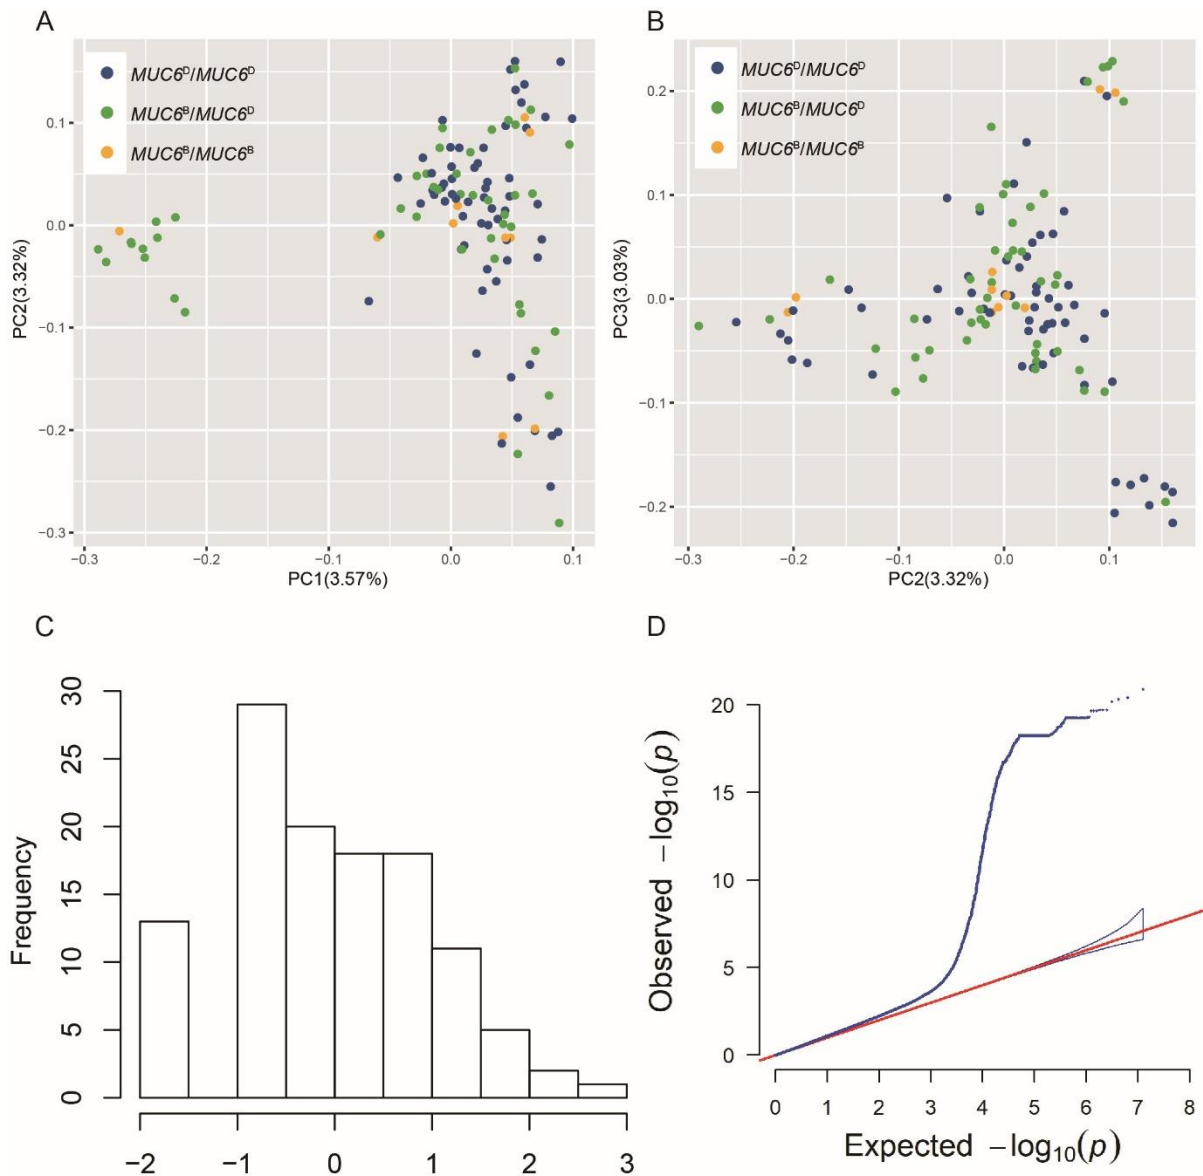

**Fig. S27.**

**Genome wide association study for fecal egg counts.** (A and B) Principal component analysis used for genome wide association data. Colors of dots indicate the genotype at *MUC6* locus. (C) The distribution of rank-based transformed fecal egg counts. (D) Quantile-quantile plot for fecal egg counts. The 95% confidence interval is shaded in blue.

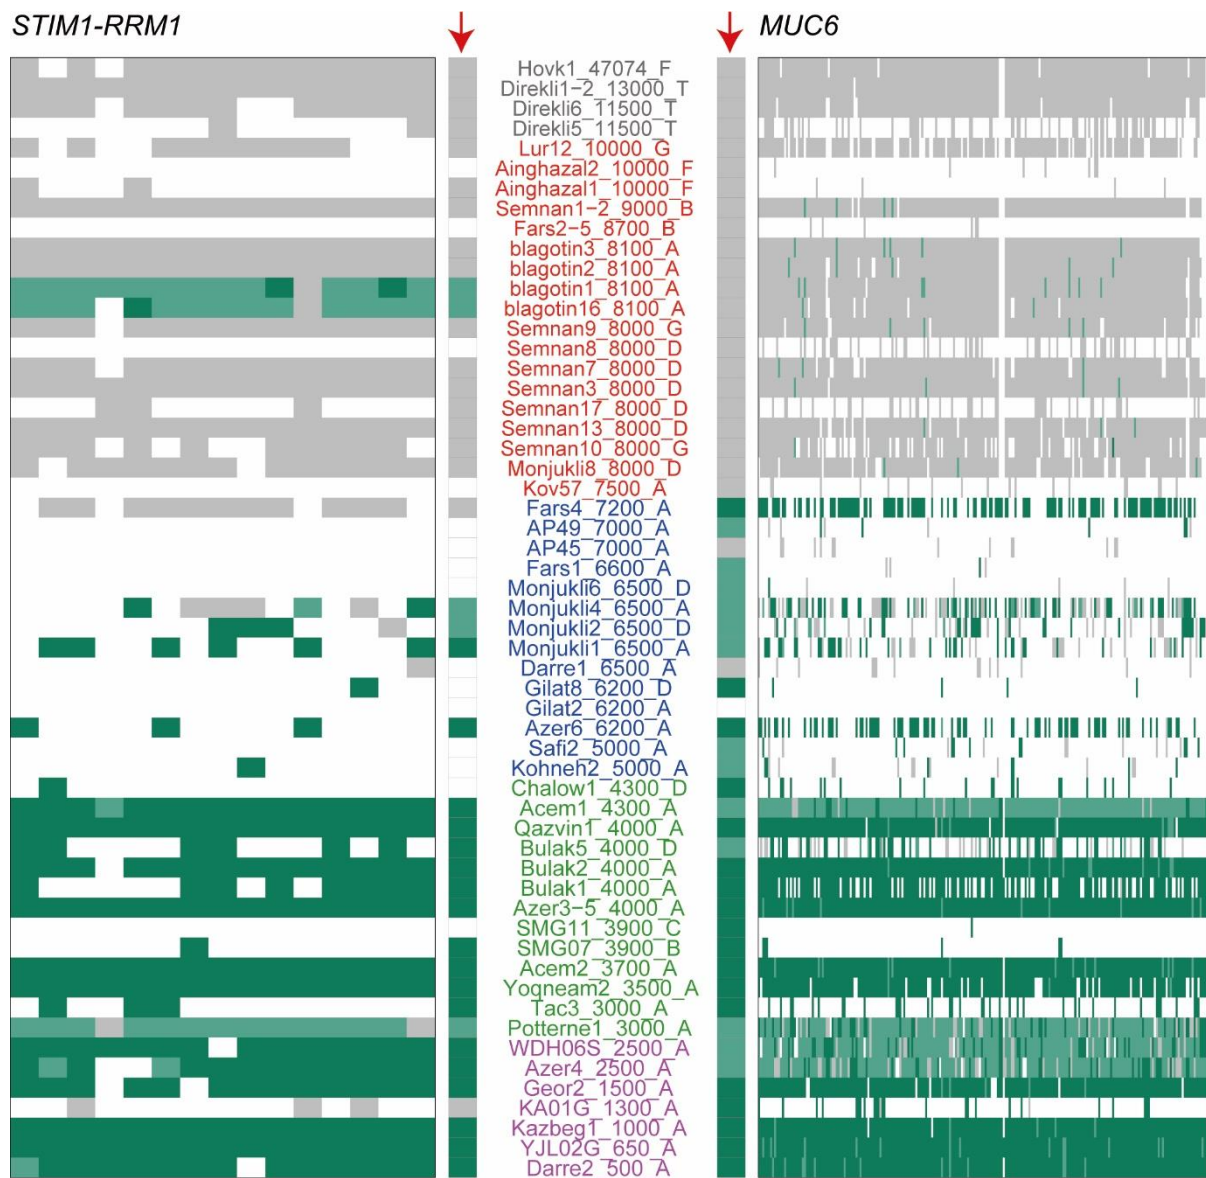

■ homozygous for ancestral allele    ■ heterozygous    ■ homozygous for derived allele

**Fig. S28.**

**Genotyping information at the *STIM1-RRM1* and *MUC6* loci for the ancient goats.** 15 SNPs within *STIM1-RRM1* locus and 228 SNPs within *MUC6* locus were used (Data file S3). The red arrows indicate the “genotype” for each individual. The presence of homozygosity and heterozygosity is shown in green and intermediate green, respectively. The absence of the derived allele is depicted in gray. Non-genotyped positions or individuals are indicated in white. The text in the middle indicates sample name, approximate age (years ago) and mitochondrial haplogroup, and is marked by colors which represent different periods from Paleolithic to Medieval contexts.

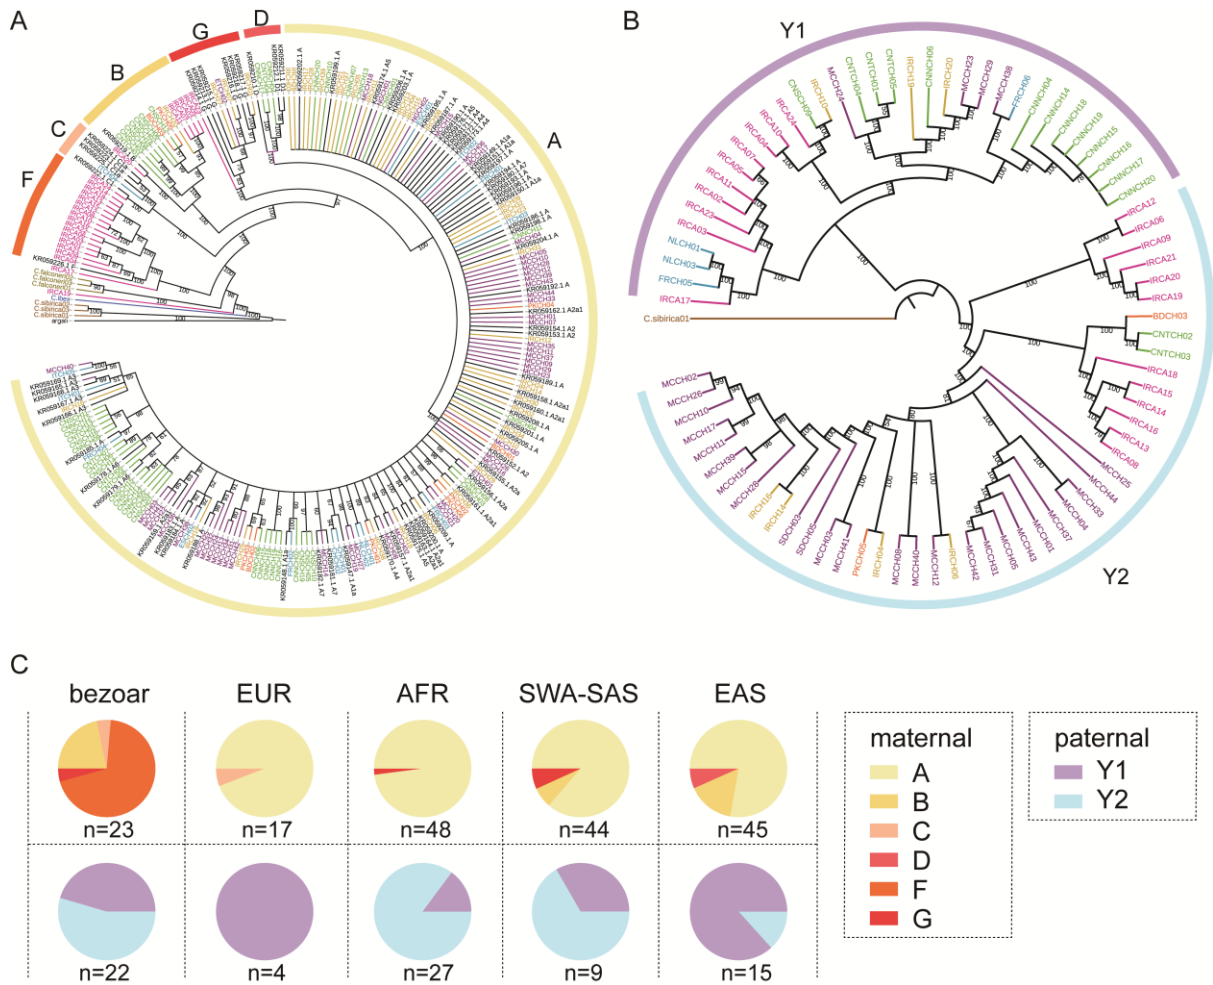

**Fig. S29. Mitochondrial genome and Y-chromosome haplotype analysis.** (A) Maximum likelihood phylogeny of the mitochondrial genomes. The majority of bezoars samples fell in haplogroup F. Sample IRCA19 fell into a more divergent clade showing similarity to the West Caucasian tur (*Capra caucasica*). (B) Maximum likelihood phylogeny of the Y-chromosome. Node labels show bootstrap support values. Population labels are color-coded as in Fig. 1. Labels without an accession number refer to samples from this study, and each node is associated with a color strip representing different haplogroups. (C) Piechart plot representing the proportion of mitogenome and Y chromosome haplogroups in bezoars and different domestic goat populations.

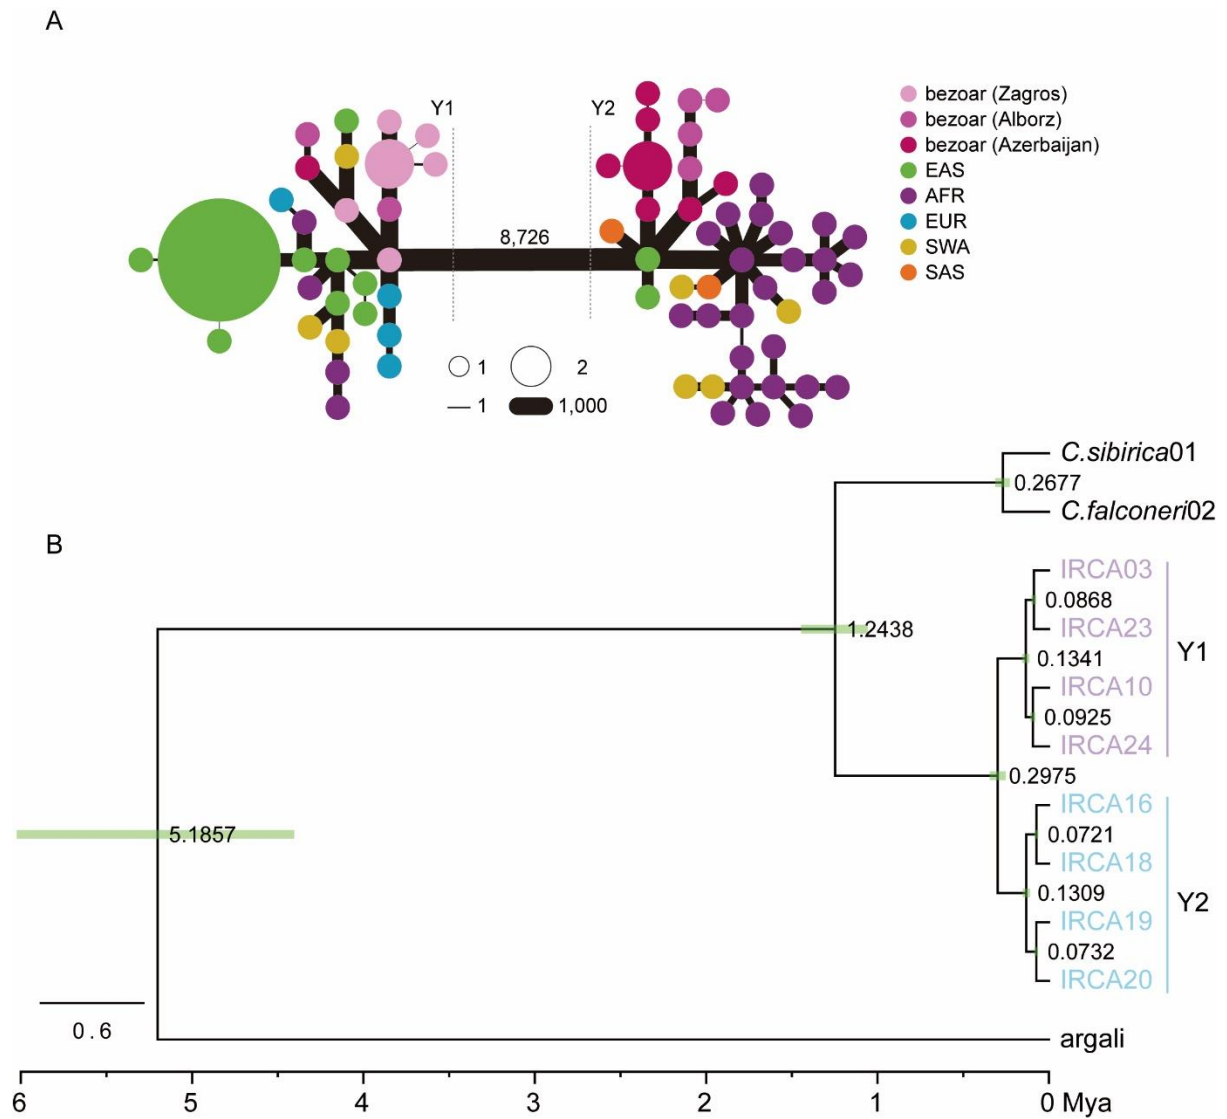

**Fig. S30.**  
**Network and time-calibrated Bayesian phylogeny of Y-chromosome haplogroups.** (A) Y-chromosome haplotype network. The width of the edges is proportional to the number of pairwise differences between the joined haplotypes. (B) Time-calibrated Bayesian phylogeny obtained with BEAST. The number indicates estimated divergence time for selected clades including 95% confidence intervals.



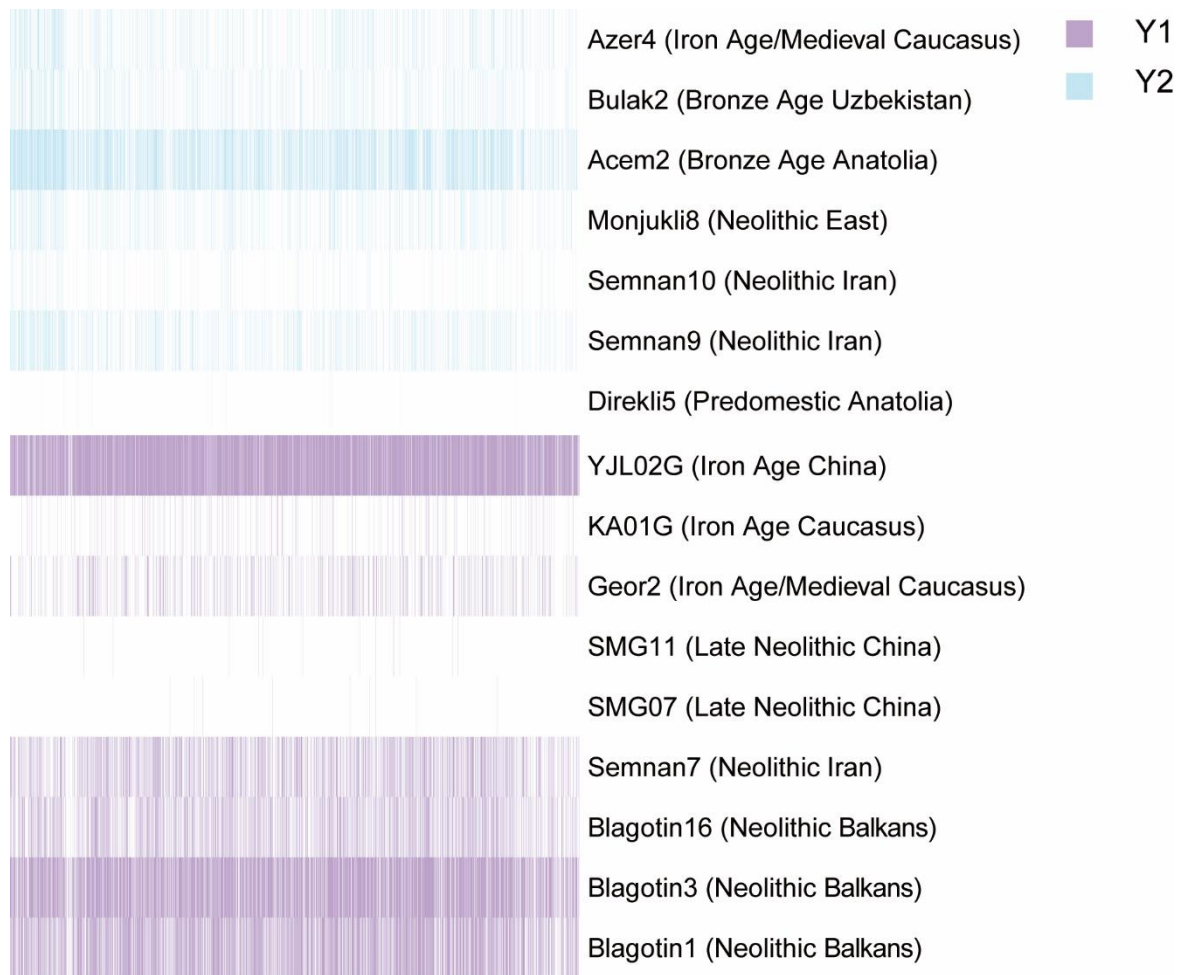

**Fig. S31.**  
**Y-chromosome haplogroups in ancient samples.** Sites with a sequencing coverage lower than  $2\times$  are represented in white.

**Table S1.**

**Summary statistics of the modern individuals aligned in this study.** Coverage is given relative to the goat reference nuclear genome. NHOM=Number of homozygous non-reference sites; NHET=Number of heterozygous.

| Sample ID | accession ID | Coverage (x) | gender | genetic group | Sampling country | Autosome  |           |           | Chromosome X |         |         | Subsample <sup>1</sup> |
|-----------|--------------|--------------|--------|---------------|------------------|-----------|-----------|-----------|--------------|---------|---------|------------------------|
|           |              |              |        |               |                  | NSNP      | NHOM      | NHET      | NSNP         | NHOM    | NHET    |                        |
| CNNCH01   | this study   | 12.80        | female | EAS           | China            | 7,764,016 | 2,592,294 | 5,171,722 | 236,457      | 78,399  | 158,058 |                        |
| CNNCH02   | this study   | 12.99        | female | EAS           | China            | 7,633,182 | 2,921,719 | 4,711,463 | 224,268      | 92,948  | 131,320 | yes                    |
| CNNCH03   | this study   | 10.62        | female | EAS           | China            | 7,625,534 | 2,788,236 | 4,837,298 | 227,812      | 84,820  | 142,992 | yes                    |
| CNNCH04   | this study   | 11.76        | male   | EAS           | China            | 7,597,010 | 2,859,356 | 4,737,654 | 169,512      | 135,410 | 34,102  | yes                    |
| CNNCH05   | this study   | 10.87        | female | EAS           | China            | 7,639,388 | 2,821,874 | 4,817,514 | 226,594      | 87,568  | 139,026 | yes                    |
| CNNCH06   | this study   | 9.52         | male   | EAS           | China            | 7,167,138 | 2,916,261 | 4,250,877 | 158,723      | 124,843 | 33,880  | yes                    |
| CNNCH07   | this study   | 10.63        | female | EAS           | China            | 7,351,677 | 2,831,260 | 4,520,417 | 219,685      | 85,227  | 134,458 | yes                    |
| CNNCH08   | this study   | 10.99        | female | EAS           | China            | 7,432,754 | 2,922,381 | 4,510,373 | 218,498      | 94,833  | 123,665 | yes                    |
| CNNCH09   | this study   | 9.21         | female | EAS           | China            | 7,280,345 | 2,729,919 | 4,550,426 | 219,608      | 82,650  | 136,958 | yes                    |
| CNNCH10   | this study   | 10.94        | female | EAS           | China            | 7,531,516 | 2,846,607 | 4,684,909 | 223,482      | 84,339  | 139,143 | yes                    |
| CNNCH11   | this study   | 11.77        | female | EAS           | China            | 6,682,673 | 3,758,226 | 2,924,447 | 178,368      | 137,321 | 41,047  |                        |
| CNNCH12   | this study   | 13.04        | female | EAS           | China            | 7,725,920 | 2,689,658 | 5,036,262 | 229,732      | 80,316  | 149,416 | yes                    |
| CNNCH13   | this study   | 10.09        | female | EAS           | China            | 7,234,063 | 2,707,696 | 4,526,367 | 212,174      | 82,297  | 129,877 | yes                    |
| CNNCH14   | this study   | 12.33        | male   | EAS           | China            | 7,698,821 | 2,885,255 | 4,813,566 | 174,514      | 144,490 | 30,024  |                        |
| CNNCH15   | this study   | 10.88        | male   | EAS           | China            | 7,429,440 | 3,137,526 | 4,291,914 | 168,441      | 138,605 | 29,836  |                        |
| CNNCH16   | this study   | 11.23        | male   | EAS           | China            | 7,566,471 | 2,979,773 | 4,586,698 | 170,545      | 141,760 | 28,785  |                        |
| CNNCH17   | this study   | 11.25        | male   | EAS           | China            | 7,407,935 | 3,189,998 | 4,217,937 | 169,576      | 141,384 | 28,192  |                        |
| CNNCH18   | this study   | 11.53        | male   | EAS           | China            | 7,399,435 | 3,218,693 | 4,180,742 | 165,815      | 146,096 | 19,719  |                        |
| CNNCH19   | this study   | 10.26        | male   | EAS           | China            | 7,469,922 | 3,064,650 | 4,405,272 | 162,110      | 142,006 | 20,104  |                        |
| CNNCH20   | this study   | 11.49        | male   | EAS           | China            | 7,486,768 | 3,128,848 | 4,357,920 | 170,558      | 140,502 | 30,056  |                        |
| CNSCH01   | SRS309478    | 43.24        | female | EAS           | China            | 7,406,216 | 3,292,623 | 4,113,593 | 222,281      | 102,540 | 119,741 | yes                    |
| CNSCH02   | this study   | 12.90        | female | EAS           | China            | 6,855,717 | 3,685,390 | 3,170,327 | 185,274      | 131,261 | 54,013  | yes                    |
| CNSCH03   | this study   | 15.77        | female | EAS           | China            | 7,311,824 | 2,667,917 | 4,643,907 | 211,038      | 90,897  | 120,141 |                        |
| CNSCH04   | this study   | 14.85        | female | EAS           | China            | 7,355,257 | 2,835,384 | 4,519,873 | 215,726      | 92,804  | 122,922 | yes                    |
| CNSCH05   | this study   | 11.96        | female | EAS           | China            | 7,545,844 | 2,921,086 | 4,624,758 | 219,664      | 100,973 | 118,691 |                        |
| CNSCH06   | this study   | 12.85        | female | EAS           | China            | 7,295,432 | 3,177,334 | 4,118,098 | 157,952      | 144,788 | 13,164  | yes                    |

|         |            |       |        |     |            |           |           |           |         |         |         |     |
|---------|------------|-------|--------|-----|------------|-----------|-----------|-----------|---------|---------|---------|-----|
| CNSCH07 | this study | 12.32 | female | EAS | China      | 7,583,199 | 2,855,644 | 4,727,555 | 223,086 | 88,314  | 134,772 |     |
| CNSCH08 | this study | 12.69 | female | EAS | China      | 7,171,300 | 3,390,615 | 3,780,685 | 215,901 | 107,527 | 108,374 | yes |
| CNSCH09 | this study | 8.15  | male   | EAS | China      | 6,992,731 | 2,825,075 | 4,167,656 | 150,419 | 120,327 | 30,092  |     |
| CNSCH10 | this study | 12.80 | female | EAS | China      | 7,018,716 | 3,578,536 | 3,440,180 | 220,172 | 104,436 | 115,736 | yes |
| CNSCH11 | this study | 10.66 | female | EAS | China      | 7,141,271 | 3,154,724 | 3,986,547 | 211,397 | 100,330 | 111,067 |     |
| CNSCH12 | this study | 12.86 | female | EAS | China      | 7,387,635 | 3,084,585 | 4,303,050 | 222,342 | 97,629  | 124,713 |     |
| CNSCH13 | this study | 8.71  | female | EAS | China      | 6,693,213 | 3,432,988 | 3,260,225 | 211,560 | 94,682  | 116,878 |     |
| CNSCH14 | this study | 18.68 | female | EAS | China      | 7,222,508 | 3,463,890 | 3,758,618 | 214,114 | 113,753 | 100,361 | yes |
| CNSCH15 | this study | 25.56 | female | EAS | China      | 7,379,823 | 3,340,508 | 4,039,315 | 223,474 | 102,434 | 121,040 | yes |
| CNSCH16 | this study | 12.15 | female | EAS | China      | 7,607,329 | 2,868,735 | 4,738,594 | 227,449 | 94,752  | 132,697 |     |
| CNSCH17 | this study | 13.46 | female | EAS | China      | 7,124,274 | 3,467,064 | 3,657,210 | 215,088 | 109,045 | 106,043 | yes |
| CNSCH18 | this study | 10.86 | female | EAS | China      | 6,796,583 | 3,585,190 | 3,211,393 | 216,465 | 101,635 | 114,830 | yes |
| CNSCH19 | this study | 17.75 | female | EAS | China      | 7,114,111 | 3,469,349 | 3,644,762 | 220,593 | 96,445  | 124,148 | yes |
| CNTCH01 | this study | 9.02  | male   | EAS | China      | 7,488,932 | 2,977,153 | 4,511,779 | 164,297 | 135,973 | 28,324  |     |
| CNTCH02 | this study | 9.33  | male   | EAS | China      | 7,526,938 | 2,968,359 | 4,558,579 | 166,015 | 138,408 | 27,607  |     |
| CNTCH03 | this study | 9.50  | male   | EAS | China      | 7,516,524 | 2,999,015 | 4,517,509 | 168,203 | 139,711 | 28,492  |     |
| CNTCH04 | this study | 10.19 | male   | EAS | China      | 7,572,738 | 2,965,445 | 4,607,293 | 170,042 | 139,262 | 30,780  |     |
| CNTCH05 | this study | 10.05 | male   | EAS | China      | 7,517,364 | 3,044,842 | 4,472,522 | 171,100 | 142,296 | 28,804  |     |
| CNTCH06 | this study | 11.84 | female | EAS | China      | 7,655,700 | 2,963,002 | 4,692,698 | 227,935 | 88,378  | 139,557 |     |
| CNTCH07 | this study | 12.52 | female | EAS | China      | 7,399,693 | 3,018,908 | 4,380,785 | 218,883 | 87,925  | 130,958 |     |
| CNTCH08 | this study | 11.23 | female | EAS | China      | 7,572,433 | 2,981,135 | 4,591,298 | 227,416 | 85,175  | 142,241 |     |
| BDCH01  | this study | 9.27  | female | SAS | Bangladesh | 7,048,223 | 3,019,440 | 4,028,783 | 211,016 | 93,155  | 117,861 | yes |
| BDCH02  | this study | 9.21  | female | SAS | Bangladesh | 7,094,294 | 3,075,834 | 4,018,460 | 213,204 | 93,367  | 119,837 | yes |
| BDCH03  | this study | 9.91  | male   | SAS | Bangladesh | 6,843,129 | 3,181,176 | 3,661,953 | 150,140 | 127,107 | 23,033  | yes |
| PKCH01  | this study | 13.29 | female | SAS | Pakistan   | 7,744,734 | 2,611,474 | 5,133,260 | 229,497 | 81,740  | 147,757 | yes |
| PKCH02  | this study | 11.53 | female | SAS | Pakistan   | 7,532,455 | 2,921,097 | 4,611,358 | 227,448 | 89,433  | 138,015 | yes |
| PKCH03  | this study | 13.07 | female | SAS | Pakistan   | 6,911,086 | 3,616,423 | 3,294,663 | 175,851 | 138,827 | 37,024  | yes |
| PKCH04  | this study | 12.46 | female | SAS | Pakistan   | 7,327,290 | 3,248,816 | 4,078,474 | 211,482 | 104,247 | 107,235 | yes |
| PKCH05  | this study | 12.10 | male   | SAS | Pakistan   | 7,622,119 | 2,879,240 | 4,742,879 | 167,518 | 140,575 | 26,943  | yes |
| PKCH06  | this study | 7.76  | female | SAS | Pakistan   | 5,631,741 | 2,443,470 | 3,188,271 | 159,401 | 72,262  | 87,139  | yes |
| IRCH01  | ERR297229  | 12.80 | female | SWA | Iran       | 7,085,338 | 3,349,431 | 3,735,907 | 187,072 | 115,644 | 71,428  |     |
| IRCH02  | ERR299449  | 12.81 | female | SWA | Iran       | 7,382,642 | 3,034,086 | 4,348,556 | 231,838 | 78,578  | 153,260 |     |

|        |            |       |        |     |      |           |           |           |         |         |         |     |
|--------|------------|-------|--------|-----|------|-----------|-----------|-----------|---------|---------|---------|-----|
| IRCH03 | ERR299456  | 12.63 | female | SWA | Iran | 7,713,126 | 2,682,648 | 5,030,478 | 230,925 | 78,307  | 152,618 |     |
| IRCH04 | ERR313197  | 11.85 | male   | SWA | Iran | 7,669,646 | 2,833,878 | 4,835,768 | 170,054 | 142,453 | 27,601  | yes |
| IRCH05 | ERR313198  | 11.76 | female | SWA | Iran | 7,733,032 | 2,671,560 | 5,061,472 | 226,549 | 77,249  | 149,300 |     |
| IRCH06 | ERR313199  | 13.44 | male   | SWA | Iran | 7,612,216 | 2,803,962 | 4,808,254 | 169,941 | 138,908 | 31,033  |     |
| IRCH07 | ERR313200  | 13.49 | female | SWA | Iran | 7,799,722 | 2,674,415 | 5,125,307 | 228,371 | 79,456  | 148,915 |     |
| IRCH08 | ERR313202  | 12.85 | female | SWA | Iran | 7,728,454 | 2,684,498 | 5,043,956 | 225,140 | 86,193  | 138,947 |     |
| IRCH09 | ERR313204  | 12.71 | female | SWA | Iran | 7,479,543 | 2,932,865 | 4,546,678 | 201,739 | 103,995 | 97,744  |     |
| IRCH10 | ERR313206  | 11.77 | male   | SWA | Iran | 7,685,202 | 2,791,637 | 4,893,565 | 167,449 | 138,805 | 28,644  | yes |
| IRCH11 | ERR313207  | 13.24 | female | SWA | Iran | 7,687,335 | 2,765,565 | 4,921,770 | 229,761 | 81,089  | 148,672 |     |
| IRCH12 | ERR313209  | 11.78 | female | SWA | Iran | 7,735,407 | 2,690,359 | 5,045,048 | 229,071 | 81,050  | 148,021 |     |
| IRCH13 | ERR313210  | 12.98 | female | SWA | Iran | 7,449,835 | 3,011,097 | 4,438,738 | 209,013 | 98,571  | 110,442 |     |
| IRCH14 | ERR313211  | 12.72 | male   | SWA | Iran | 7,006,847 | 3,461,821 | 3,545,026 | 170,322 | 140,058 | 30,264  |     |
| IRCH15 | ERR313212  | 12.80 | female | SWA | Iran | 7,751,422 | 2,678,828 | 5,072,594 | 228,649 | 79,704  | 148,945 |     |
| IRCH16 | ERR313213  | 12.88 | male   | SWA | Iran | 7,582,483 | 2,877,784 | 4,704,699 | 166,634 | 137,339 | 29,295  |     |
| IRCH17 | ERR313215  | 12.41 | female | SWA | Iran | 7,636,896 | 2,780,865 | 4,856,031 | 230,648 | 78,694  | 151,954 |     |
| IRCH18 | ERR340332  | 11.21 | female | SWA | Iran | 7,674,970 | 2,708,378 | 4,966,592 | 230,980 | 80,804  | 150,176 |     |
| IRCH19 | ERR340337  | 10.86 | male   | SWA | Iran | 7,643,341 | 2,724,586 | 4,918,755 | 162,479 | 134,161 | 28,318  |     |
| IRCH20 | ERR340339  | 11.35 | male   | SWA | Iran | 7,683,661 | 2,693,103 | 4,990,558 | 163,826 | 135,637 | 28,189  |     |
| IRCH21 | this study | 13.25 | female | SWA | Iran | 7,582,163 | 2,763,983 | 4,818,180 | 227,004 | 80,323  | 146,681 | yes |
| IRCH23 | this study | 11.82 | female | SWA | Iran | 7,429,074 | 2,742,284 | 4,686,790 | 216,751 | 80,769  | 135,982 |     |
| IRCH24 | this study | 10.26 | female | SWA | Iran | 7,298,436 | 2,661,151 | 4,637,285 | 212,424 | 78,808  | 133,616 |     |
| IRCH25 | this study | 8.68  | female | SWA | Iran | 7,273,403 | 2,794,216 | 4,479,187 | 218,824 | 88,775  | 130,049 | yes |
| IRCH26 | this study | 11.83 | female | SWA | Iran | 7,653,126 | 2,684,076 | 4,969,050 | 227,049 | 76,290  | 150,759 |     |
| IRCH27 | this study | 15.18 | female | SWA | Iran | 7,724,579 | 2,722,809 | 5,001,770 | 231,210 | 78,404  | 152,806 |     |
| IRCH28 | this study | 12.44 | female | SWA | Iran | 7,558,682 | 2,833,825 | 4,724,857 | 226,357 | 82,818  | 143,539 | yes |
| IRCH29 | this study | 16.00 | female | SWA | Iran | 7,831,222 | 2,651,724 | 5,179,498 | 237,375 | 80,087  | 157,288 |     |
| IRCH30 | this study | 9.74  | female | SWA | Iran | 7,520,621 | 2,708,712 | 4,811,909 | 225,645 | 79,516  | 146,129 |     |
| IRCH31 | this study | 10.87 | female | SWA | Iran | 7,489,457 | 2,904,654 | 4,584,803 | 222,132 | 87,650  | 134,482 | yes |
| IRCH32 | this study | 13.51 | female | SWA | Iran | 7,565,674 | 2,875,569 | 4,690,105 | 226,795 | 82,456  | 144,339 | yes |
| IRCH34 | this study | 7.26  | female | SWA | Iran | 7,071,485 | 3,012,863 | 4,058,622 | 207,788 | 92,943  | 114,845 | yes |
| IRCH36 | this study | 10.49 | female | SWA | Iran | 7,241,016 | 2,914,343 | 4,326,673 | 219,902 | 76,400  | 143,502 | yes |
| IRCH37 | this study | 9.12  | female | SWA | Iran | 7,537,910 | 2,794,331 | 4,743,579 | 225,722 | 83,738  | 141,984 | yes |

|        |            |       |        |     |          |           |           |           |         |         |         |     |
|--------|------------|-------|--------|-----|----------|-----------|-----------|-----------|---------|---------|---------|-----|
| IRCH38 | this study | 6.23  | female | SWA | Iran     | 5,915,690 | 2,988,244 | 2,927,446 | 176,115 | 84,511  | 91,604  | yes |
| IRCH39 | this study | 9.74  | female | SWA | Iran     | 7,406,295 | 2,791,730 | 4,614,565 | 220,524 | 80,413  | 140,111 |     |
| ETCH01 | this study | 11.03 | female | AFR | Ethiopia | 7,257,110 | 2,854,724 | 4,402,386 | 207,348 | 82,716  | 124,632 |     |
| ETCH02 | this study | 9.74  | female | AFR | Ethiopia | 7,233,827 | 2,792,007 | 4,441,820 | 208,017 | 81,484  | 126,533 |     |
| MCCH01 | ERR219543  | 12.67 | male   | AFR | Morocco  | 7,346,216 | 2,580,059 | 4,766,157 | 152,967 | 125,364 | 27,603  |     |
| MCCH02 | ERR219546  | 13.48 | male   | AFR | Morocco  | 7,023,881 | 2,960,878 | 4,063,003 | 151,635 | 123,250 | 28,385  | yes |
| MCCH03 | ERR229471  | 13.22 | male   | AFR | Morocco  | 7,077,277 | 2,888,355 | 4,188,922 | 153,016 | 127,498 | 25,518  | yes |
| MCCH04 | ERR229474  | 12.72 | male   | AFR | Morocco  | 6,818,630 | 3,083,415 | 3,735,215 | 139,624 | 121,388 | 18,236  |     |
| MCCH05 | ERR229476  | 13.35 | male   | AFR | Morocco  | 7,076,086 | 2,845,637 | 4,230,449 | 148,866 | 117,333 | 31,533  | yes |
| MCCH06 | ERR229478  | 13.51 | female | AFR | Morocco  | 7,339,483 | 2,634,557 | 4,704,926 | 200,082 | 79,672  | 120,410 | yes |
| MCCH07 | ERR229479  | 12.03 | female | AFR | Morocco  | 7,278,077 | 2,657,545 | 4,620,532 | 202,619 | 72,268  | 130,351 | yes |
| MCCH08 | ERR229481  | 13.50 | male   | AFR | Morocco  | 7,347,826 | 2,636,145 | 4,711,681 | 154,208 | 126,885 | 27,323  | yes |
| MCCH09 | ERR229484  | 15.05 | female | AFR | Morocco  | 7,414,975 | 2,630,026 | 4,784,949 | 211,071 | 74,063  | 137,008 |     |
| MCCH10 | ERR229485  | 12.84 | male   | AFR | Morocco  | 7,283,645 | 2,616,435 | 4,667,210 | 156,569 | 129,826 | 26,743  | yes |
| MCCH11 | ERR229487  | 13.14 | male   | AFR | Morocco  | 7,338,072 | 2,652,133 | 4,685,939 | 156,425 | 126,494 | 29,931  | yes |
| MCCH12 | ERR232492  | 12.26 | male   | AFR | Morocco  | 7,309,614 | 2,592,036 | 4,717,578 | 151,780 | 123,707 | 28,073  |     |
| MCCH13 | ERR234304  | 12.15 | female | AFR | Morocco  | 7,024,848 | 2,927,486 | 4,097,362 | 210,797 | 72,770  | 138,027 |     |
| MCCH14 | ERR234305  | 13.44 | female | AFR | Morocco  | 6,930,851 | 3,013,168 | 3,917,683 | 198,600 | 73,179  | 125,421 |     |
| MCCH15 | ERR234315  | 13.55 | male   | AFR | Morocco  | 7,324,580 | 2,657,714 | 4,666,866 | 155,081 | 127,176 | 27,905  |     |
| MCCH16 | ERR246143  | 12.20 | female | AFR | Morocco  | 7,296,198 | 2,669,730 | 4,626,468 | 208,158 | 72,158  | 136,000 |     |
| MCCH17 | ERR246152  | 13.76 | male   | AFR | Morocco  | 6,487,369 | 3,585,512 | 2,901,857 | 158,680 | 130,304 | 28,376  |     |
| MCCH18 | ERR246153  | 14.63 | female | AFR | Morocco  | 7,203,867 | 2,749,227 | 4,454,640 | 197,786 | 86,568  | 111,218 | yes |
| MCCH19 | ERR248926  | 13.47 | female | AFR | Morocco  | 7,281,347 | 2,657,817 | 4,623,530 | 202,357 | 74,339  | 128,018 |     |
| MCCH20 | ERR248928  | 14.55 | female | AFR | Morocco  | 7,364,541 | 2,612,649 | 4,751,892 | 211,925 | 73,826  | 138,099 |     |
| MCCH21 | ERR248929  | 13.63 | female | AFR | Morocco  | 7,309,797 | 2,645,795 | 4,664,002 | 205,985 | 72,631  | 133,354 |     |
| MCCH22 | ERR248933  | 13.49 | female | AFR | Morocco  | 7,217,658 | 2,731,835 | 4,485,823 | 205,630 | 76,846  | 128,784 | yes |
| MCCH23 | ERR299283  | 13.62 | male   | AFR | Morocco  | 7,286,846 | 2,732,274 | 4,554,572 | 158,426 | 130,303 | 28,123  |     |
| MCCH24 | ERR313257  | 12.23 | male   | AFR | Morocco  | 7,324,295 | 2,621,591 | 4,702,704 | 153,217 | 125,250 | 27,967  |     |
| MCCH25 | ERR313258  | 13.21 | male   | AFR | Morocco  | 7,173,855 | 2,791,622 | 4,382,233 | 153,676 | 123,103 | 30,573  |     |
| MCCH26 | ERR313259  | 15.06 | male   | AFR | Morocco  | 7,396,448 | 2,648,724 | 4,747,724 | 151,601 | 123,745 | 27,856  |     |
| MCCH27 | ERR313264  | 15.22 | female | AFR | Morocco  | 7,466,651 | 2,584,261 | 4,882,390 | 209,282 | 71,923  | 137,359 |     |
| MCCH28 | ERR313266  | 12.35 | male   | AFR | Morocco  | 6,663,936 | 3,352,994 | 3,310,942 | 152,683 | 125,103 | 27,580  |     |

|        |            |       |        |     |         |           |           |           |         |         |         |     |
|--------|------------|-------|--------|-----|---------|-----------|-----------|-----------|---------|---------|---------|-----|
| MCCH29 | ERR313272  | 13.44 | male   | AFR | Morocco | 7,380,812 | 2,621,383 | 4,759,429 | 151,146 | 122,201 | 28,945  |     |
| MCCH30 | ERR315498  | 13.26 | female | AFR | Morocco | 7,407,369 | 2,563,753 | 4,843,616 | 213,265 | 73,327  | 139,938 |     |
| MCCH31 | ERR315500  | 13.25 | male   | AFR | Morocco | 7,328,719 | 2,639,615 | 4,689,104 | 154,432 | 126,267 | 28,165  |     |
| MCCH32 | ERR315503  | 15.76 | female | AFR | Morocco | 7,279,280 | 2,720,081 | 4,559,199 | 197,414 | 89,171  | 108,243 | yes |
| MCCH33 | ERR315505  | 13.49 | male   | AFR | Morocco | 7,363,209 | 2,604,940 | 4,758,269 | 147,725 | 121,037 | 26,688  |     |
| MCCH34 | ERR315508  | 14.21 | female | AFR | Morocco | 7,229,463 | 2,705,212 | 4,524,251 | 212,255 | 73,330  | 138,925 |     |
| MCCH35 | ERR315510  | 12.67 | female | AFR | Morocco | 7,309,978 | 2,656,436 | 4,653,542 | 207,506 | 72,793  | 134,713 |     |
| MCCH36 | ERR315512  | 12.38 | female | AFR | Morocco | 7,329,860 | 2,658,346 | 4,671,514 | 202,202 | 71,180  | 131,022 |     |
| MCCH37 | ERR315515  | 11.89 | male   | AFR | Morocco | 7,290,004 | 2,643,202 | 4,646,802 | 154,258 | 126,193 | 28,065  |     |
| MCCH38 | ERR315516  | 14.42 | male   | AFR | Morocco | 6,630,928 | 3,308,863 | 3,322,065 | 151,202 | 122,764 | 28,438  |     |
| MCCH39 | ERR315795  | 11.93 | male   | AFR | Morocco | 7,256,439 | 2,682,006 | 4,574,433 | 154,540 | 127,187 | 27,353  |     |
| MCCH40 | ERR318768  | 12.88 | male   | AFR | Morocco | 6,479,974 | 3,445,106 | 3,034,868 | 150,599 | 117,504 | 33,095  |     |
| MCCH41 | ERR332581  | 11.86 | male   | AFR | Morocco | 7,344,370 | 2,560,213 | 4,784,157 | 153,840 | 117,216 | 36,624  |     |
| MCCH42 | ERR332592  | 11.86 | male   | AFR | Morocco | 7,262,471 | 2,646,847 | 4,615,624 | 147,913 | 124,022 | 23,891  |     |
| MCCH43 | ERR340428  | 12.89 | male   | AFR | Morocco | 7,193,037 | 2,751,892 | 4,441,145 | 149,852 | 122,516 | 27,336  |     |
| MCCH44 | ERR345973  | 11.53 | male   | AFR | Morocco | 7,331,815 | 2,594,560 | 4,737,255 | 152,135 | 124,996 | 27,139  |     |
| NGCH01 | this study | 8.23  | female | AFR | Nigeria | 6,397,757 | 2,835,779 | 3,561,978 | 179,388 | 78,347  | 101,041 |     |
| NGCH02 | this study | 10.84 | female | AFR | Nigeria | 6,501,718 | 3,034,356 | 3,467,362 | 184,740 | 85,183  | 99,557  |     |
| SDCH01 | this study | 9.47  | female | AFR | Sudan   | 7,183,958 | 2,853,722 | 4,330,236 | 209,741 | 82,038  | 127,703 |     |
| SDCH02 | this study | 10.18 | female | AFR | Sudan   | 7,219,253 | 2,869,335 | 4,349,918 | 208,313 | 82,487  | 125,826 |     |
| SDCH03 | this study | 8.86  | male   | AFR | Sudan   | 7,079,349 | 2,855,975 | 4,223,374 | 154,350 | 129,343 | 25,007  |     |
| SDCH04 | this study | 9.84  | female | AFR | Sudan   | 7,087,863 | 2,832,044 | 4,255,819 | 206,826 | 82,311  | 124,515 |     |
| SDCH05 | this study | 9.68  | male   | AFR | Sudan   | 6,829,064 | 3,069,343 | 3,759,721 | 147,901 | 124,403 | 23,498  |     |
| SDCH06 | this study | 9.69  | female | AFR | Sudan   | 6,944,596 | 2,904,455 | 4,040,141 | 196,871 | 86,089  | 110,782 |     |
| CHCH01 | SRR3144625 | 12.69 | female | EUR | Swiss   | 6,516,499 | 3,622,050 | 2,894,449 | 201,658 | 72,561  | 129,097 |     |
| CHCH02 | SRX1560780 | 11.59 | female | EUR | Swiss   | 7,102,163 | 2,950,380 | 4,151,783 | 203,984 | 76,111  | 127,873 |     |
| ESCH01 | this study | 13.80 | female | EUR | Spain   | 7,094,439 | 2,722,987 | 4,371,452 | 202,446 | 72,881  | 129,565 |     |
| ESCH02 | this study | 10.44 | female | EUR | Spain   | 6,776,393 | 2,862,886 | 3,913,507 | 186,849 | 88,804  | 98,045  |     |
| FRCH01 | ERR470101  | 13.45 | female | EUR | France  | 7,263,557 | 2,875,521 | 4,388,036 | 197,043 | 68,559  | 128,484 | yes |
| FRCH02 | ERR470102  | 13.25 | female | EUR | France  | 7,305,827 | 2,847,375 | 4,458,452 | 203,195 | 68,196  | 134,999 | yes |
| FRCH03 | ERR470103  | 14.23 | female | EUR | France  | 7,277,129 | 2,885,918 | 4,391,211 | 194,402 | 76,455  | 117,947 | yes |
| FRCH04 | ERR470105  | 13.89 | female | EUR | France  | 7,208,321 | 2,959,577 | 4,248,744 | 201,640 | 67,864  | 133,776 | yes |

|        |            |       |        |                     |             |           |           |           |         |         |         |     |
|--------|------------|-------|--------|---------------------|-------------|-----------|-----------|-----------|---------|---------|---------|-----|
| FRCH05 | this study | 13.83 | male   | EUR                 | France      | 7,280,889 | 2,812,689 | 4,468,200 | 145,578 | 114,250 | 31,328  | yes |
| FRCH06 | this study | 14.40 | male   | EUR                 | France      | 7,269,032 | 2,734,792 | 4,534,240 | 143,886 | 113,166 | 30,720  |     |
| ITCH01 | ERR405774  | 14.11 | female | EUR                 | Italy       | 7,279,760 | 2,864,788 | 4,414,972 | 199,622 | 72,223  | 127,399 | yes |
| ITCH02 | ERR405775  | 14.42 | female | EUR                 | Italy       | 7,358,898 | 2,805,803 | 4,553,095 | 199,346 | 77,143  | 122,203 | yes |
| ITCH03 | ERR405776  | 13.69 | female | EUR                 | Italy       | 7,138,373 | 3,005,874 | 4,132,499 | 195,982 | 77,016  | 118,966 | yes |
| ITCH04 | ERR405777  | 13.85 | female | EUR                 | Italy       | 7,266,163 | 2,867,616 | 4,398,547 | 200,698 | 67,299  | 133,399 | yes |
| ITCH05 | ERR405778  | 13.67 | female | EUR                 | Italy       | 7,261,563 | 2,843,544 | 4,418,019 | 192,262 | 89,497  | 102,765 | yes |
| NLCH01 | this study | 13.56 | male   | EUR                 | Netherlands | 7,021,507 | 3,046,971 | 3,974,536 | 152,960 | 122,306 | 30,654  |     |
| NLCH02 | this study | 14.01 | female | EUR                 | Netherlands | 7,030,444 | 3,170,155 | 3,860,289 | 203,971 | 85,443  | 118,528 |     |
| NLCH03 | this study | 11.11 | male   | EUR                 | Netherlands | 7,266,780 | 2,760,307 | 4,506,473 | 146,866 | 117,905 | 28,961  | yes |
| IRCA01 | ERR340328  | 6.51  | female | bezoar (Alborz)     | Iran        | 6,933,969 | 3,245,765 | 3,688,204 | 216,962 | 109,936 | 107,026 | yes |
| IRCA02 | ERR340329  | 5.56  | male   | bezoar (Zagros)     | Iran        | 6,170,163 | 3,949,216 | 2,220,947 | 138,379 | 123,321 | 15,058  | yes |
| IRCA03 | ERR340330  | 12.33 | male   | bezoar (Alborz)     | Iran        | 7,904,428 | 3,218,364 | 4,686,064 | 190,748 | 164,052 | 26,696  | yes |
| IRCA04 | ERR340331  | 11.65 | male   | bezoar (Alborz)     | Iran        | 7,433,499 | 3,618,012 | 3,815,487 | 184,905 | 158,686 | 26,219  | yes |
| IRCA05 | ERR340333  | 6.35  | male   | bezoar (Zagros)     | Iran        | 6,497,702 | 3,806,648 | 2,691,054 | 146,176 | 127,910 | 18,266  | yes |
| IRCA06 | ERR340334  | 12.11 | male   | bezoar (Azerbaijan) | Iran        | 7,361,515 | 3,740,976 | 3,620,539 | 189,086 | 163,400 | 25,686  | yes |
| IRCA07 | ERR340335  | 6.62  | male   | bezoar (Zagros)     | Iran        | 6,680,833 | 3,752,362 | 2,928,471 | 150,144 | 131,409 | 18,735  | yes |
| IRCA08 | ERR340336  | 6.51  | male   | bezoar (Azerbaijan) | Iran        | 6,807,849 | 3,578,533 | 3,229,316 | 154,642 | 136,448 | 18,194  | yes |
| IRCA09 | ERR340338  | 11.37 | male   | bezoar (Alborz)     | Iran        | 7,717,451 | 3,349,567 | 4,367,884 | 184,299 | 158,811 | 25,488  | yes |
| IRCA10 | ERR340340  | 12.07 | male   | bezoar (Azerbaijan) | Iran        | 7,579,000 | 3,529,477 | 4,049,523 | 187,877 | 162,001 | 25,876  | yes |
| IRCA11 | ERR340341  | 5.17  | male   | bezoar (Zagros)     | Iran        | 6,143,265 | 3,758,863 | 2,384,402 | 129,340 | 113,606 | 15,734  | yes |
| IRCA12 | ERR340342  | 6.42  | male   | bezoar (Azerbaijan) | Iran        | 6,773,004 | 3,585,467 | 3,187,537 | 159,027 | 141,117 | 17,910  | yes |
| IRCA13 | ERR340343  | 7.26  | male   | bezoar (Azerbaijan) | Iran        | 7,076,423 | 3,587,532 | 3,488,891 | 163,110 | 141,654 | 21,456  | yes |
| IRCA14 | ERR340344  | 11.20 | male   | bezoar (Azerbaijan) | Iran        | 7,536,358 | 3,504,944 | 4,031,414 | 183,880 | 158,196 | 25,684  | yes |
| IRCA15 | ERR340345  | 11.60 | male   | bezoar (Azerbaijan) | Iran        | 7,435,301 | 3,639,107 | 3,796,194 | 186,304 | 163,340 | 22,964  | yes |
| IRCA16 | ERR340347  | 12.70 | male   | bezoar (Azerbaijan) | Iran        | 7,443,507 | 3,649,340 | 3,794,167 | 188,096 | 161,692 | 26,404  | yes |
| IRCA17 | ERR340348  | 10.72 | male   | bezoar (Zagros)     | Iran        | 7,671,169 | 3,236,902 | 4,434,267 | 176,888 | 149,130 | 27,758  | yes |
| IRCA18 | ERR340426  | 12.36 | male   | bezoar (Azerbaijan) | Iran        | 7,573,668 | 3,521,243 | 4,052,425 | 179,094 | 162,220 | 16,874  | yes |

|               |            |       |        |                        |              |            |            |            |         |         |         |     |
|---------------|------------|-------|--------|------------------------|--------------|------------|------------|------------|---------|---------|---------|-----|
| IRCA19        | ERR470100  | 15.04 | male   | bezoar (Alborz)        | Iran         | 7,861,964  | 3,135,552  | 4,726,412  | 181,814 | 153,368 | 28,446  | yes |
| IRCA20        | ERR470104  | 14.44 | male   | bezoar (Alborz)        | Iran         | 7,944,135  | 3,216,458  | 4,727,677  | 189,740 | 160,241 | 29,499  | yes |
| IRCA21        | ERR470106  | 14.66 | male   | bezoar (Alborz)        | Iran         | 7,825,865  | 3,156,458  | 4,669,407  | 184,925 | 155,133 | 29,792  | yes |
| IRCA22        | ERS154870  | 43.70 | female | bezoar (Azerbaijan)    | Iran         | 7,849,370  | 3,342,918  | 4,506,452  | 246,434 | 114,090 | 132,344 | yes |
| IRCA23        | SRR1576679 | 16.81 | male   | bezoar (Zagros)        | Iran         | 7,936,661  | 3,143,116  | 4,793,545  | 181,297 | 151,139 | 30,158  | yes |
| IRCA24        | this study | 11.56 | male   | bezoar (Zagros)        | Iran         | 7,805,135  | 3,092,291  | 4,712,844  | 175,346 | 144,459 | 30,887  | yes |
| NUHY01        | this study | 7.60  | female | hybrid <sup>2</sup>    | Sudan        | 16,650,876 | 3,699,308  | 12,951,568 | 453,422 | 99,071  | 354,351 |     |
| NUHY02        | this study | 7.27  | male   | hybrid <sup>2</sup>    | Sudan        | 16,413,852 | 3,718,584  | 12,695,268 | 139,777 | 101,594 | 38,183  |     |
| NUHY03        | this study | 3.88  | male   | hybrid <sup>2</sup>    | Sudan        | 12,271,503 | 4,148,725  | 8,122,778  | 102,648 | 79,126  | 23,522  |     |
| NUHY04        | this study | 4.15  | male   | hybrid <sup>2</sup>    | Sudan        | 11,905,405 | 3,571,672  | 8,333,733  | 101,433 | 73,917  | 27,516  |     |
| C.falconeri01 | this study | 8.94  | male   | <i>Capra falconeri</i> | Central Asia | 17,528,518 | 13,344,279 | 4,184,239  | 568,353 | 539,390 | 28,963  |     |
| C.falconeri02 | this study | 27.60 | male   | <i>Capra falconeri</i> | Central Asia | 18,822,547 | 13,508,682 | 5,313,865  | 655,012 | 602,579 | 52,433  |     |
| C.falconeri03 | this study | 10.40 | male   | <i>Capra falconeri</i> | Central Asia | 18,332,587 | 13,487,789 | 4,844,798  | 608,669 | 576,862 | 31,807  |     |
| C.sibirica01  | this study | 47.43 | male   | <i>Capra sibirica</i>  | Central Asia | 18,448,986 | 13,914,991 | 4,533,995  | 652,906 | 614,919 | 37,987  |     |
| C.sibirica02  | this study | 9.75  | female | <i>Capra sibirica</i>  | Central Asia | 17,260,145 | 13,760,875 | 3,499,270  | 667,551 | 554,102 | 113,449 |     |
| C.sibirica03  | this study | 12.31 | female | <i>Capra sibirica</i>  | Central Asia | 17,564,840 | 13,451,003 | 4,113,837  | 688,586 | 529,597 | 158,989 |     |
| C.ibex        | this study | 10.08 | female | <i>Capra ibex</i>      | Europe       | 14,946,935 | 14,014,603 | 932,332    | 600,948 | 571,073 | 29,875  |     |

<sup>1</sup> The samples used in the ADMIXTURE and SMC++ analysis after downsampling, <sup>2</sup> *Capra nubiana* × domestic goat.



**Table S2.**  
**Summary statistics of the historical sample.**

| Sample ID | MNHN Identifier      | Species                | Skeletal Material | Mass of bone powder used (mg) | Gender | Mean depth of autosomal |
|-----------|----------------------|------------------------|-------------------|-------------------------------|--------|-------------------------|
| Tur1      | MNHN ZM AC 1982-1092 | <i>Capra caucasica</i> | Tooth root        | 148                           | male   | 3.52                    |

**Table S3.**  
**Summary statistics of the ancient goats.** Samples marked with an asterisk indicate that the sample has been directly radiocarbon.

| Sample ID | Age (years ago) | Location                    | Gender | Endogenous content | Breadth of coverage in autosome | Mean depth of coverage in autosome | mtDNA depth | Haplotype |
|-----------|-----------------|-----------------------------|--------|--------------------|---------------------------------|------------------------------------|-------------|-----------|
| YJL02G*   | ~650            | Yanjialiang, Inner Mongolia | male   | 78.58%             | 99.75%                          | 13.44                              | 455         | A         |
| WDH06S    | ~2,500          | Wangdahu, Ningxia           | female | 88.05%             | 97.79%                          | 8.19                               | 565         | A         |
| SMG07     | ~3,900          | Shimao, Shaanxi             | male   | 3.96%              | 3.46%                           | 0.04                               | 9           | B         |
| SMG11     | ~3,900          | Shimao, Shaanxi             | male   | 1.56%              | 1.94%                           | 0.04                               | 10          | C         |
| KA01G*    | ~1,300          | Northern Caucasus           | male   | 16.33%             | 0.14%                           | 0.32                               | 53          | A         |

**Table S4.**

**Ancient genomes used in this study.** Samples marked with an asterisk were sequenced in this study.

| Sample ID  | Coverage (q30) | mtDNA | Context        | Grouping for autosomal analysis |
|------------|----------------|-------|----------------|---------------------------------|
| Hovk1      | 3.08           | F     | Paleolithic    | Armenia                         |
| Direkli1-2 | 11.55          | T     | Epipaleolithic | Anatolia                        |
| Direkli6   | 1.93           | T     | Epipaleolithic | Anatolia                        |
| Direkli5   | 0.27           | T     | Epipaleolithic | Anatolia                        |
| Lur12      | 1.05           | G     | Neolithic      | Neolithic Iran                  |
| Ainghazal2 | 0.06           | F     | Neolithic      | Neolithic Levant                |
| Ainghazal1 | 0.03           | F     | Neolithic      | Neolithic Levant                |
| Semnan1-2  | 6.85           | B     | Neolithic      | Neolithic Iran                  |
| Fars2-5    | 0.03           | B     | Neolithic      | Neolithic Iran                  |
| Blagotin3  | 11.47          | A     | Neolithic      | Neolithic Balkans               |
| Blagotin2  | 4.02           | A     | Neolithic      | Neolithic Balkans               |
| Blagotin1  | 6.99           | A     | Neolithic      | Neolithic Balkans               |
| Blagotin16 | 3.51           | A     | Neolithic      | Neolithic Balkans               |
| Semnan9    | 3.05           | G     | Neolithic      | Neolithic Iran                  |
| Semnan8    | 0.21           | D     | Neolithic      | Neolithic Iran                  |
| Semnan7    | 3.28           | D     | Neolithic      | Neolithic Iran                  |
| Semnan3    | 14.89          | D     | Neolithic      | Neolithic Iran                  |
| Semnan17   | 0.12           | D     | Neolithic      | Neolithic Iran                  |
| Semnan13   | 2.54           | D     | Neolithic      | Neolithic Iran                  |
| Semnan10   | 1.43           | G     | Neolithic      | Neolithic Iran                  |
| Monjukli8  | 2.57           | D     | Neolithic      | Neolithic East                  |
| Kov57      | 0.07           | A     | Neolithic      | Neolithic Balkans               |
| Fars4      | 1.05           | A     | Chalcolithic   | Chalcolithic Iran               |
| AP49       | 0.02           | A     | Neolithic      | Neolithic Balkans               |
| AP45       | 0.02           | A     | Neolithic      | Neolithic Balkans               |
| Fars1      | 0.02           | A     | Chalcolithic   | Chalcolithic Iran               |
| Monjukli6  | 0.03           | D     | Chalcolithic   | Chalcolithic Turkmenistan       |
| Monjukli4  | 0.6            | A     | Chalcolithic   | Chalcolithic Turkmenistan       |
| Monjukli2  | 0.21           | D     | Chalcolithic   | Chalcolithic Turkmenistan       |
| Monjukli1  | 0.24           | A     | Chalcolithic   | Chalcolithic Turkmenistan       |
| Darre1     | 0.04           | A     | Chalcolithic   | Chalcolithic Iran               |
| Gilat8     | 0.02           | D     | Chalcolithic   | Chalcolithic Levant             |
| Gilat2     | 0.012          | A     | Chalcolithic   | -                               |
| Azer6      | 0.28           | A     | Chalcolithic   | Chalcolithic Caucasus           |
| Safi2      | 0.04           | A     | Bronze Age     | Bronze Age Levant               |
| Kohneh2    | 0.04           | A     | Bronze Age     | Bronze Age Caucasus             |
| Chalow1    | 0.05           | D     | Bronze Age     | Bronze Age Iran                 |
| Acem1      | 4.76           | A     | Bronze Age     | Bronze Age Anatolia             |
| Qazvin1    | 3.16           | A     | Bronze Age     | Bronze Age Iran                 |
| Bulak5     | 0.27           | D     | Bronze Age     | Bronze Age Uzbekistan           |
| Bulak2     | 2.67           | A     | Bronze Age     | Bronze Age Uzbekistan           |
| Bulak1     | 0.87           | A     | Bronze Age     | Bronze Age Uzbekistan           |
| Azer3-5    | 4.66           | A     | Bronze Age     | Bronze Age Caucasus             |
| SMG11*     | 0.04           | C     | Neolithic      | late Neolithic China            |
| SMG07*     | 0.04           | B     | Neolithic      | late Neolithic China            |

|           |       |   |            |                            |
|-----------|-------|---|------------|----------------------------|
| Acem2     | 8.67  | A | Bronze Age | Bronze Age Anatolia        |
| Yoqneam2  | 2.2   | A | Bronze Age | Bronze Age Levant          |
| Tac3      | 0.13  | A | Bronze Age | Bronze Age Caucasus        |
| Potterne1 | 3.67  | A | Bronze Age | Bronze Age Britain         |
| WDH06S*   | 8.19  | A | Bronze Age | Bronze Age China           |
| Azer4     | 2.57  | A | Iron Age   | Iron Age/Medieval Caucasus |
| Geor2     | 1.5   | A | Medieval   | Iron Age/Medieval Caucasus |
| KA01G*    | 0.32  | A | Iron Age   | Iron Age/Medieval Caucasus |
| Kazbeg1   | 3.84  | A | Medieval   | Iron Age/Medieval Caucasus |
| YJL02G*   | 13.44 | A | Iron Age   | Iron Age China             |
| Darre2    | 3.93  | A | Medieval   | Medieval Iran              |

**Table S5.**

**Distribution of SNPs identified in bezoars and domestic goats within various genomic regions annotated by ANNOVAR.**

| Category               | SNP Count  |
|------------------------|------------|
| intergenic             | 28,785,194 |
| intronic               | 16,686,992 |
| ncRNA_intronic         | 485,410    |
| downstream             | 311,151    |
| UTR3                   | 298,612    |
| upstream               | 298,295    |
| synonymous             | 203,187    |
| nonsynonymous          | 169,878    |
| UTR5                   | 87,386     |
| ncRNA_exonic           | 54,835     |
| unknown                | 12,917     |
| upstream; downstream   | 11,394     |
| stopgain               | 1,905      |
| splicing               | 1,031      |
| ncRNA_splicing         | 213        |
| stoploss               | 168        |
| UTR5; UTR3             | 150        |
| exonic; splicing       | 47         |
| ncRNA_exonic; splicing | 10         |

**Table S6.**

**Pairwise  $F_{ST}$  values calculated at the continent scale.** On the continent scale,  $F_{ST}$  values correlated with geographical distances between populations when the center of origin was considered to be Southwest Asia.

| Population | bezoar | SWA   | EUR   | AFR   | SAS   |
|------------|--------|-------|-------|-------|-------|
| SWA        | 0.071  |       |       |       |       |
| EUR        | 0.101  | 0.069 |       |       |       |
| AFR        | 0.100  | 0.049 | 0.062 |       |       |
| SAS        | 0.095  | 0.030 | 0.107 | 0.095 |       |
| EAS        | 0.091  | 0.031 | 0.098 | 0.089 | 0.038 |

**Table S7.**

**Summary of population histories calculated from 2D-SFS.** Confidence intervals were obtained by bootstrapping all sites and performing parameter inference on each bootstrap dataset with 100 runs.

| Group   | Model                                                 | Parameter | Description                                                                      | Point estimation | Confidence interval (95%) |             |
|---------|-------------------------------------------------------|-----------|----------------------------------------------------------------------------------|------------------|---------------------------|-------------|
|         |                                                       |           |                                                                                  |                  | Lower bound               | Upper bound |
| EUR-AFR | model6                                                | Nanc      | Ancestral population size                                                        | 347,424          | 297,882                   | 540,824     |
|         |                                                       | T1        | The scale time before split                                                      | 161,566          | 111,647                   | 169,156     |
|         |                                                       | Napop1    | Size of population 1 after split                                                 | 52,538           | 48,650                    | 57,944      |
|         |                                                       | Napop2    | Size of population 2 after split                                                 | 23,496           | 21,779                    | 29,256      |
|         |                                                       | Ncpop1    | Present size of population 1                                                     | 12,158           | 11,473                    | 13,585      |
|         |                                                       | Ncpop2    | Present size of population 2                                                     | 87,314           | 87,159                    | 103,875     |
|         |                                                       | T2        | The scale time between the split and population 2 size change                    | 24,264           | 18,003                    | 35,080      |
|         |                                                       | T3        | The scale time between the population 2 size change and population 1 size change | 14,369           | 8,975                     | 15,677      |
|         |                                                       | T4        | The scale time between the population 1 size change and the present              | 3,499            | 3,109                     | 4,127       |
|         |                                                       | m12_1     | Migration from population 2 to population 1 during T2                            | 8.64E-07         | 3.27E-07                  | 1.26E-06    |
|         |                                                       | m21_1     | Migration from population 1 to population 2 during T2                            | 4.61E-06         | 3.40E-06                  | 1.78E-05    |
|         |                                                       | m12_2     | Migration from population 2 to population 1 during T3                            | 2.94E-05         | 2.48E-05                  | 5.25E-05    |
|         |                                                       | m21_2     | Migration from population 1 to population 2 during T3                            | 5.13E-05         | 3.20E-05                  | 6.86E-05    |
|         |                                                       | m12_3     | Migration from population 2 to population 1 during T4                            | 1.48E-05         | 5.19E-06                  | 1.41E-05    |
| m21_3   | Migration from population 1 to population 2 during T4 | 7.51E-06  | 1.86E-06                                                                         | 7.87E-06         |                           |             |
| EUR-SWA | model5                                                | Nanc      | Ancestral population size                                                        | 1,054,443        | 659,416                   | 1,939,890   |
|         |                                                       | T1        | The scale time before split                                                      | 67,785           | 43,369                    | 68,293      |
|         |                                                       | Napop1    | Size of population 1 after split                                                 | 142,879          | 123,544                   | 144,188     |
|         |                                                       | Napop2    | Size of population 2 after split                                                 | 105,474          | 102,453                   | 124,650     |
|         |                                                       | Ncpop1    | Present size of population 1                                                     | 15,002           | 12,650                    | 16,754      |
|         |                                                       | Ncpop2    | Present size of population 2                                                     | 128,478          | 92,545                    | 130,776     |
|         |                                                       | T2        | The scale time between the split and population 1 size change                    | 178,163          | 148,397                   | 225,631     |
|         |                                                       | T3        | The scale time between the population 1 size change and population 2 size change | 10,376           | 7,509                     | 11,832      |
|         |                                                       | T4        | The scale time between the population 2 size change and the present              | 2,647            | 2,490                     | 5,155       |
|         |                                                       | m12_1     | Migration from population 2 to population 1 during T2                            | 5.86E-06         | 3.73E-06                  | 6.90E-06    |

|  |  |        |                                                               |           |           |           |
|--|--|--------|---------------------------------------------------------------|-----------|-----------|-----------|
|  |  | m21_1  | Migration from population 1 to population 2 during T2         | 1.10E-05  | 6.76E-06  | 1.12E-05  |
|  |  | m12_2  | Migration from population 2 to population 1 during T3         | 6.18E-05  | 6.10E-05  | 1.09E-04  |
|  |  | m21_2  | Migration from population 1 to population 2 during T3         | 1.98E-05  | 2.16E-05  | 3.85E-05  |
|  |  | m12_3  | Migration from population 2 to population 1 during T4         | 2.67E-06  | 4.74E-08  | 1.32E-05  |
|  |  | m21_3  | Migration from population 1 to population 2 during T4         | 8.98E-07  | 5.47E-09  | 9.00E-07  |
|  |  | Nanc   | Ancestral population size                                     | 2,599,134 | 2,566,167 | 2,861,780 |
|  |  | T1     | The scale time before split                                   | 103,095   | 102,467   | 104,954   |
|  |  | Napop1 | Size of population 1 after split                              | 35,040    | 33,446    | 36,663    |
|  |  | Napop2 | Size of population 2 after split                              | 144,192   | 134,486   | 155,022   |
|  |  | Ncpop1 | Present size of population 1                                  | 63,084    | 59,762    | 66,535    |
|  |  | Ncpop2 | Present size of population 2                                  | 100,117   | 93,284    | 108,257   |
|  |  | T2     | The scaled time between the split and the secondary contact   | 147,379   | 122,095   | 183,998   |
|  |  | T3     | The scaled time between the secondary contact and the present | 11,689    | 10,563    | 13,507    |
|  |  | m12_1  | Migration from population 2 to population 1 during T2         | 2.72E-05  | 2.55E-05  | 2.88E-05  |
|  |  | m21_1  | Migration from population 1 to population 2 during T2         | 1.61E-06  | 7.46E-07  | 2.29E-06  |
|  |  | m12_2  | Migration from population 2 to population 1 during T3         | 3.73E-05  | 3.52E-05  | 3.92E-05  |
|  |  | m21_2  | Migration from population 1 to population 2 during T3         | 3.36E-05  | 3.15E-05  | 3.61E-05  |
|  |  | Nanc   | Ancestral population size                                     | 198,725   | 198,090   | 202,464   |
|  |  | T1     | The scale time before split                                   | 516,982   | 431,042   | 525,841   |
|  |  | Napop1 | Size of population 1 after split                              | 16,780    | 10,554    | 25,752    |
|  |  | Napop2 | Size of population 2 after split                              | 1,824     | 1,052     | 3,130     |
|  |  | Ncpop1 | Present size of population 1                                  | 201,549   | 182,630   | 258,568   |
|  |  | Ncpop2 | Present size of population 2                                  | 12,403    | 12,092    | 13,199    |
|  |  | T2     | The scaled time between the split and the secondary contact   | 1,001     | 615       | 2,064     |
|  |  | T3     | The scaled time between the secondary contact and the present | 9,373     | 8,105     | 9,641     |
|  |  | m12_1  | Migration from population 2 to population 1 during T2         | 3.77E-05  | 2.88E-05  | 7.94E-05  |
|  |  | m21_1  | Migration from population 1 to population 2 during T2         | 1.32E-04  | 7.87E-05  | 1.31E-04  |
|  |  | m12_2  | Migration from population 2 to population 1 during T3         | 9.53E-06  | 8.26E-06  | 1.06E-05  |
|  |  | m21_2  | Migration from population 1 to population 2 during T3         | 7.05E-05  | 6.71E-05  | 7.29E-05  |

**Table S8.**  
***D*-statistics for population relatedness between wild *Capra* species and domestic goat populations.**

| Statistic                                                                                                                                                                                               | Populations X                                                                                                                              | Z-score(s) | Interpretation                                                                                                                                            |
|---------------------------------------------------------------------------------------------------------------------------------------------------------------------------------------------------------|--------------------------------------------------------------------------------------------------------------------------------------------|------------|-----------------------------------------------------------------------------------------------------------------------------------------------------------|
| <i>D</i> ( <i>C. ibex</i> , <i>C. caucasica</i> ; X, argali);<br><i>D</i> ( <i>C. falconeri</i> , <i>C. caucasica</i> ; X, argali);<br><i>D</i> ( <i>C. sibirica</i> , <i>C. caucasica</i> ; X, argali) | All ancient and modern domestic goats and bezoars                                                                                          | All > 16.8 | Domestic goats and bezoars share more alleles with the <i>C. caucasica</i> than with the other three ibex-like species                                    |
| <i>D</i> ( <i>C. falconeri</i> , <i>C. ibex</i> ; X, argali);<br><i>D</i> ( <i>C. sibirica</i> , <i>C. ibex</i> ; X, argali)                                                                            | All ancient and modern domestic goats and bezoars                                                                                          | All > 66   | Domestic goats and bezoars share more alleles with the <i>C. ibex</i> than with the <i>C. falconeri</i> and <i>C. sibirica</i>                            |
| <i>D</i> ( <i>C. sibirica</i> , <i>C. falconeri</i> ; X, argali)                                                                                                                                        | All ancient and modern domestic goats and bezoars                                                                                          | All > 23   | Domestic goats and bezoars share more alleles with the <i>C. falconeri</i> than with the <i>C. sibirica</i>                                               |
| <i>D</i> (X, Armenian Bezoar; <i>C. caucasica</i> , argali);<br><i>D</i> (X, Anatolian Bezoar; <i>C. caucasica</i> , argali)                                                                            | All ancient domestic goats                                                                                                                 | All > 6.9  | <i>C. caucasica</i> shares more alleles with pre-domestication bezoars than with ancient domestic goats                                                   |
| <i>D</i> (Neolithic Iran, Neolithic Balkans; <i>C. caucasica</i> , argali);<br><i>D</i> (Neolithic China, Neolithic Balkans; <i>C. caucasica</i> , argali)                                              | –                                                                                                                                          | All > 5    | <i>C. caucasica</i> shares more alleles with the Neolithic Balkan domestic goats than with the Neolithic Iranian and the Neolithic Chinese domestic goats |
| <i>D</i> (X <sub>1</sub> , X <sub>2</sub> ; <i>C. caucasica</i> , argali)                                                                                                                               | X <sub>1</sub> : modern Asian (SWA, SAS, and EAS) domestic goats;<br>X <sub>2</sub> : modern European/African (EUR and AFR) domestic goats | All > 11.4 | <i>C. caucasica</i> shares more alleles with modern European/African domestic goats than with modern Asian domestic goats                                 |

Here the ancient samples with an average of coverage equal to or higher than three were used in this analysis.

**Table S9.**

***f*<sub>3</sub>-statistics results showing AFR gene flow into SWA and *C. caucasica* gene flow into Armenian bezoar (Hovk1) dating to > 47,000. As positive Z-scores are not meaningful in *f*<sub>3</sub>-statistics, we only reported the case with the negative Z-score.**

| Statistic                                     | Source1             | Source2             | Target            | <i>f</i> <sub>3</sub> | std.err  | Z-score | SNPs       |
|-----------------------------------------------|---------------------|---------------------|-------------------|-----------------------|----------|---------|------------|
| modern                                        | AFR                 | EAS (South China)   | EAS (North China) | -0.00625              | 0.000281 | -22.255 | 15,730,078 |
|                                               | AFR                 | SAS (Bangladesh)    | SWA               | -0.00518              | 0.000289 | -17.961 | 16,299,325 |
|                                               | AFR                 | SAS (Pakistan)      | SWA               | -0.00494              | 0.000229 | -21.547 | 17,454,670 |
|                                               | AFR                 | EAS (South China)   | SWA               | -0.00244              | 0.00028  | -8.711  | 16,832,722 |
| (modern bezoar, <i>C. caucasica</i> ; target) | bezoar (Azerbaijan) | <i>C. caucasica</i> | Hovk1             | -0.02363              | 0.000965 | -24.487 | 4,771,412  |
|                                               | bezoar (Alborz)     | <i>C. caucasica</i> | Hovk1             | -0.01791              | 0.000973 | -18.417 | 4,746,128  |
|                                               | bezoar (Zagros)     | <i>C. caucasica</i> | Qazvin1           | -0.01626              | 0.000627 | -25.915 | 5,314,101  |
|                                               | bezoar (Alborz)     | <i>C. caucasica</i> | Qazvin1           | -0.01487              | 0.000766 | -19.425 | 4,881,248  |
|                                               | bezoar (Azerbaijan) | <i>C. caucasica</i> | Qazvin1           | -0.01221              | 0.000801 | -15.241 | 4,921,386  |
|                                               | bezoar (Alborz)     | <i>C. caucasica</i> | Kazbeg1           | -0.00086              | 0.00103  | -0.835  | 4,730,479  |

**Table S10.**

**KEGG pathway enrichment analysis of the genes contained in the candidate introgressed regions.**

| KEGG pathway                            | Input number | Background number | Corrected P-Value | genes                                                   |
|-----------------------------------------|--------------|-------------------|-------------------|---------------------------------------------------------|
| Amoebiasis                              | 4            | 111               | 0.005283635       | <i>SERPINB4, CD1B, COL4A4, SERPINB3</i>                 |
| Neuroactive ligand-receptor interaction | 5            | 285               | 0.00931116        | <i>LOC102191616, LOC102170425, P2RY13, TAAR8, PTH2R</i> |

**Table S11.**

**Summary of 24 selection sweeps on the X chromosome.** The maximum  $F_{ST}$  and  $\ln \pi$  ratio for each region are shown.

| No. | Chr            | Start (bp) | End (bp)   | Max $F_{ST}$ | Max $\ln$ ratio ( $\theta_{\pi, \text{bezoar}} / \theta_{\pi, \text{domestic}}$ ) | genes                    |
|-----|----------------|------------|------------|--------------|-----------------------------------------------------------------------------------|--------------------------|
| 1   | NW_017189516.1 | 60,001     | 150,000    | 0.46         | 1.23                                                                              |                          |
| 2   | NW_017189516.1 | 860,001    | 910,000    | 0.45         | 1.15                                                                              | <i>LOC102175103</i>      |
| 3   | NW_017189516.1 | 4,640,001  | 4,690,000  | 0.49         | 1.05                                                                              | <i>ZNF711, POF1B</i>     |
| 4   | NW_017189516.1 | 5,720,001  | 5,890,000  | 0.55         | 1.31                                                                              | <i>CYLC1</i>             |
| 5   | NW_017189516.1 | 5,900,001  | 6,090,000  | 0.48         | 1.26                                                                              |                          |
| 6   | NW_017189516.1 | 6,100,001  | 6,210,000  | 0.47         | 1.11                                                                              |                          |
| 7   | NW_017189516.1 | 6,680,001  | 6,750,000  | 0.46         | 1.31                                                                              |                          |
| 8   | NW_017189516.1 | 6,800,001  | 6,970,000  | 0.47         | 1.34                                                                              |                          |
| 9   | NW_017189516.1 | 6,980,001  | 7,030,000  | 0.47         | 1.00                                                                              |                          |
| 10  | NW_017189516.1 | 7,040,001  | 7,110,000  | 0.53         | 1.18                                                                              | <i>RPS6KA6</i>           |
| 11  | NW_017189516.1 | 7,140,001  | 7,230,000  | 0.55         | 1.21                                                                              | <i>RPS6KA6, HDX</i>      |
| 12  | NW_017189516.1 | 7,260,001  | 7,310,000  | 0.54         | 1.07                                                                              |                          |
| 13  | NW_017189516.1 | 13,720,001 | 14,450,000 | <b>0.75</b>  | <b>3.08</b>                                                                       | <b>AR</b>                |
| 14  | NW_017189516.1 | 16,920,001 | 17,010,000 | 0.47         | 1.27                                                                              |                          |
| 15  | NW_017189516.1 | 18,840,001 | 18,910,000 | 0.55         | 1.58                                                                              |                          |
| 16  | NW_017189516.1 | 22,100,001 | 22,270,000 | 0.66         | 1.20                                                                              |                          |
| 17  | NW_017189516.1 | 23,620,001 | 23,690,000 | 0.49         | 1.34                                                                              | <i>PHF8, FAM120C</i>     |
| 18  | NW_017189516.1 | 24,340,001 | 24,450,000 | 0.56         | 1.23                                                                              | <i>LOC102181853</i>      |
| 19  | NW_017189516.1 | 24,480,001 | 24,550,000 | 0.54         | 1.05                                                                              |                          |
| 20  | NW_017189516.1 | 24,560,001 | 24,630,000 | 0.56         | 1.07                                                                              |                          |
| 21  | NW_017189516.1 | 25,140,001 | 25,250,000 | 0.53         | 1.70                                                                              | <i>RRAGB</i>             |
| 22  | NW_017189516.1 | 25,600,001 | 25,670,000 | 0.60         | 1.06                                                                              | <i>PFKFB1</i>            |
| 23  | NW_017189516.1 | 32,480,001 | 32,590,000 | 0.64         | 1.23                                                                              |                          |
| 24  | NW_017189516.1 | 50,000,001 | 50,110,000 | 0.63         | 1.15                                                                              | <i>MAP7D2, CXHXorf23</i> |



**Table S12.**  
**Enriched KEGG pathway among candidate selection sweep genes.**

| KEGG pathway                                             | Input number | Background number | Corrected P-value | genes                                                                                                                                                                                                                                                                                                                                                                             |
|----------------------------------------------------------|--------------|-------------------|-------------------|-----------------------------------------------------------------------------------------------------------------------------------------------------------------------------------------------------------------------------------------------------------------------------------------------------------------------------------------------------------------------------------|
| Olfactory transduction                                   | 26           | 420               | 2.80E-11          | <i>LOC102190689, LOC102177547, LOC102184830, LOC102175911, LOC102178263, LOC102177261, LOC102185386, LOC108636866, LOC102183422, LOC102182057, LOC102182595, LOC102185677, LOC108637609, LOC102175539, LOC102176982, LOC102183709, LOC102185107, LOC102177709, LOC102181521, LOC102177974, LOC102182330, LOC102184268, LOC102183163, LOC102183437, LOC102177429, LOC102175633</i> |
| Influenza A                                              | 14           | 176               | 2.35E-07          | <i>IRF3, LOC106503997, IFNGR2, NUP98, LOC102179184, LOC102190983, LOC102178719, IFNAR1, IFNGR1, MAPK12, LOC108637852, EP300, LOC108634246, MAPK11</i>                                                                                                                                                                                                                             |
| Malaria                                                  | 7            | 49                | 2.77E-05          | <i>HBBC, LOC102175600, SDC1, LOC102168959, LOC102176710, LOC102175876, LOC102168680</i>                                                                                                                                                                                                                                                                                           |
| African trypanosomiasis                                  | 6            | 35                | 5.85E-05          | <i>LOC102176710, LOC102175600, LOC102168959, HBBC, LOC102175876, LOC102168680</i>                                                                                                                                                                                                                                                                                                 |
| Natural killer cell mediated cytotoxicity                | 9            | 135               | 0.000240677       | <i>LOC106503997, CD48, FCER1G, LOC102175817, IFNAR1, IFNGR1, IFNGR2, LOC108634246, LOC102182460</i>                                                                                                                                                                                                                                                                               |
| Measles                                                  | 9            | 136               | 0.00025292        | <i>IRF3, LOC106503997, LOC102190983, IFNAR1, IFNGR1, IFNGR2, LOC108637852, LOC108634246, SLAMF1</i>                                                                                                                                                                                                                                                                               |
| Neuroactive ligand-receptor interaction                  | 12           | 278               | 0.00054143        | <i>F2, LOC102177821, MC5R, CHRN1, LOC102179184, MC2R, LEPR, LOC102178719, NPBWR2, LOC108637670, OPRL1, MC4R</i>                                                                                                                                                                                                                                                                   |
| Signaling pathways regulating pluripotency of stem cells | 8            | 142               | 0.001701777       | <i>IGF1, RIF1, LHX5, AXIN1, JARID2, DVL2, MAPK11, MAPK12</i>                                                                                                                                                                                                                                                                                                                      |
| Herpes simplex infection                                 | 9            | 186               | 0.001931567       | <i>IRF3, LOC102175817, IFNAR1, POLR2A, IFNGR1, IFNGR2, LOC108637852, EP300, LOC102190983</i>                                                                                                                                                                                                                                                                                      |
| Cytokine-cytokine receptor interaction                   | 10           | 265               | 0.005033411       | <i>TNFSF13, TNFSF12, LOC106503997, CSF1, LEPR, IFNAR1, IFNGR1, IFNGR2, LOC108634246, TNFRSF6B</i>                                                                                                                                                                                                                                                                                 |

|                                 |   |     |             |                                                                        |
|---------------------------------|---|-----|-------------|------------------------------------------------------------------------|
| Osteoclast differentiation      | 7 | 132 | 0.005359714 | <i>IFNGR2, CSF1, IFNAR1, MAPK11, MAPK12, MITF, IFNGR1</i>              |
| Hepatitis C                     | 7 | 133 | 0.005567875 | <i>IRF3, IFNAR1, MAPK11, MAPK12, LOC108637852, LOC102190983, CLDN7</i> |
| FoxO signaling pathway          | 7 | 134 | 0.005760138 | <i>PRMT1, SLC2A4, GABARAP, IGF1, MAPK11, MAPK12, EP300</i>             |
| Adipocytokine signaling pathway | 5 | 70  | 0.008846879 | <i>CPT1C, CPT1B, NPY, SLC2A4, LEPR</i>                                 |

**Table S13.**  
**Additional genes with a function in immunity referring to GeneCards/NCBI.**

| <b>Gene name</b>                         | <b>Potential function/effect</b>                                              |
|------------------------------------------|-------------------------------------------------------------------------------|
| <i>RIF1</i>                              | Immunoglobulin class-switch recombination (CSR) during antibody genesis       |
| <i>LOC102183650</i><br>( <i>SLAMF7</i> ) | Humoral immunity and antibody response                                        |
| <i>LOC102182927</i><br>( <i>SLAMF8</i> ) | Humoral immunity and antibody response                                        |
| <i>SLAMF6</i>                            | Humoral immunity and antibody response                                        |
| <i>CD84</i>                              | Signaling lymphocyte activation                                               |
| <i>F11R</i>                              | Immune System                                                                 |
| <i>ARHGAP30</i>                          | Regulation of IgA production in intestinal immune network                     |
| <i>PFDN2</i>                             | Adaptive immune system                                                        |
| <i>NIT1</i>                              | A negative regulator of primary T-cells                                       |
| <i>FBXL13</i>                            | Innate Immune System                                                          |
| <i>IRAK3</i>                             | Immunity                                                                      |
| <i>KLHL42</i>                            | Innate Immune System                                                          |
| <i>TNIP2</i>                             | Immune response IL-23 signaling pathway                                       |
| <i>TNFAIP6</i>                           | Innate Immune System                                                          |
| <i>CYSTM1</i>                            | Innate Immune System                                                          |
| <i>IGIP</i>                              | IgA Inducing Protein                                                          |
| <i>ARG1</i>                              | Inflammation and immunity                                                     |
| <i>REL</i>                               | Regulation of the survival and proliferation of B lymphocytes                 |
| <i>OPRL1</i>                             | Inflammatory and immune responses                                             |
| <i>POP1</i>                              | Regulation of excessive inflammatory responses                                |
| <i>ATG13</i>                             | Autophagy Pathway                                                             |
| <i>ART1</i>                              | Innate Immune System                                                          |
| <i>RHOG</i>                              | Regulation of trans-endothelial migration of leukocytes                       |
| <i>GABARAP</i>                           | Inflammation                                                                  |
| <i>PSMD8</i>                             | Adaptive Immune System                                                        |
| <i>SPRED3</i>                            | Innate Immune System                                                          |
| <i>RASGRP4</i>                           | Innate Immune System                                                          |
| <i>FCGRT</i>                             | Selective Igg Deficiency Disease and Immunodeficiency 43                      |
| <i>PHF23</i>                             | Autophagy pathway                                                             |
| <i>GPS2</i>                              | Key regulator of inflammation, lipid metabolism and mitochondrion homeostasis |
| <i>KDM6B</i>                             | Association with inflammatory diseases                                        |
| <i>AHRR</i>                              | Suppress inflammation                                                         |
| <i>MC5R</i>                              | Pigmentation and inflammation                                                 |
| <i>MC2R</i>                              | Pigmentation and inflammation                                                 |
| <i>MITF</i>                              | Innate Immune System                                                          |
| <i>MC4R</i>                              | Pigmentation and inflammation                                                 |
| <i>MGRN1</i>                             | Innate Immune System                                                          |
| <i>PPL</i>                               | Innate Immune System                                                          |
| <i>MUC6</i>                              | Gastrointestinal parasite resistance and expulsion                            |
| <i>ELF2</i>                              | B and T cell development, cell cycle progression, and angiogenesis            |

**Table S14.**

**Summary of nonsynonymous SNPs showing  $F_{ST} > 0.88$  in *MUC6* between modern bezoars and domestic goats.**

| Chr | Pos        | Ref | Alt | $F_{ST}$ |
|-----|------------|-----|-----|----------|
| 29  | 46,245,173 | C   | T   | 0.888    |
| 29  | 46,247,389 | T   | A   | 0.896    |
| 29  | 46,247,410 | T   | C   | 0.896    |
| 29  | 46,247,683 | T   | C   | 0.891    |
| 29  | 46,248,226 | A   | G   | 0.891    |
| 29  | 46,248,397 | G   | T   | 0.887    |
| 29  | 46,248,537 | C   | G   | 0.895    |
| 29  | 46,248,619 | T   | C   | 0.891    |
| 29  | 46,248,646 | C   | T   | 0.891    |
| 29  | 46,254,119 | G   | A   | 0.903    |
| 29  | 46,259,627 | G   | A   | 0.887    |
| 29  | 46,264,308 | T   | C   | 0.886    |
| 29  | 46,264,872 | T   | C   | 0.891    |
| 29  | 46,265,931 | C   | T   | 0.891    |
| 29  | 46,266,673 | C   | T   | 0.942    |
| 29  | 46,267,289 | C   | T   | 0.888    |

**Table S15.**

**Additional genes with a function in nervous system referring to GeneCards/NCBI.**

| Gene name      | Potential function/effect                                                                                    |
|----------------|--------------------------------------------------------------------------------------------------------------|
| <i>ROR1</i>    | Neurite growth in the central nervous system                                                                 |
| <i>NPY</i>     | Central nervous system                                                                                       |
| <i>HMGA2</i>   | Neural stem cell development                                                                                 |
| <i>RBFOX2</i>  | A key regulator of alternative exon splicing in the nervous system and other cell types                      |
| <i>KCTD8</i>   | Regulation in inhibitory neurotransmitter in the mammalian central nervous system                            |
| <i>HTT</i>     | Striatal neurons development                                                                                 |
| <i>PURA</i>    | Nervous system development                                                                                   |
| <i>EP300</i>   | Nervous system development                                                                                   |
| <i>NRG2</i>    | Neuregulin family of growth and differentiation factors                                                      |
| <i>MFSD14B</i> | Intracellular neuronal membrane-bound proteins                                                               |
| <i>ALK</i>     | Regulation in brain development and specific neurons development in the nervous system                       |
| <i>PUM2</i>    | Nervous system development                                                                                   |
| <i>NBEA</i>    | Central nervous system                                                                                       |
| <i>VPS13B</i>  | Central nervous system development                                                                           |
| <i>STIM1</i>   | Regulation in the differentiation from mouse embryonic stem cells to neural cells                            |
| <i>RRM1</i>    | Nervous system development                                                                                   |
| <i>SBF2</i>    | Association with neuropathy, congenital hypomyelinating or amyelinating through infecting peripheral nervous |
| <i>RPH3A</i>   | Regulation in synaptic transmission                                                                          |
| <i>LHX5</i>    | Differentiation and development of the forebrain                                                             |

---

|                |                                                                                                                                                    |
|----------------|----------------------------------------------------------------------------------------------------------------------------------------------------|
| <i>ELF2</i>    | Nervous system development                                                                                                                         |
| <i>FREM3</i>   | Regulation of reactivity to environmental stimuli and perceptual processing speed                                                                  |
| <i>DVL2</i>    | Nervous system development                                                                                                                         |
| <i>NOSIP</i>   | Development of neurogenesis                                                                                                                        |
| <i>RRAS</i>    | Regulation of axon formation and guidance                                                                                                          |
| <i>DLG4</i>    | Regulation of the ratio of excitatory to inhibitory synapses in hippocampal neurons                                                                |
| <i>NLGN2</i>   | Formation and remodeling of central nervous system synapses                                                                                        |
| <i>FGF11</i>   | Nervous system development                                                                                                                         |
| <i>KDM6B</i>   | Association with neurodegenerative diseases                                                                                                        |
| <i>CHD3</i>    | Nervous system development                                                                                                                         |
| <i>JARID2</i>  | Regulation in neurulation in mouse models                                                                                                          |
| <i>DTNBP1</i>  | Neurite extension                                                                                                                                  |
| <i>ANKS1A</i>  | Association with Adjustment Disorder                                                                                                               |
| <i>PACSIN1</i> | Neuron morphogenesis                                                                                                                               |
| <i>ROGDI</i>   | Nervous system development                                                                                                                         |
| <i>GDF10</i>   | A stroke-induced signal for axonal sprouting and functional recovery                                                                               |
| <i>GDF2</i>    | Regulation in cartilage and bone development, angiogenesis and differentiation of cholinergic central nervous system neurons                       |
| <i>RYR1</i>    | Association with the release of Ca <sup>2+</sup> from intracellular stores in neurons, promoting prolonged Ca <sup>2+</sup> signaling in the brain |

---

**Data file S1. Overview of the 112 candidate regions (introgressed haplotype frequency > 0.1) introgressed from ibex-like species into domestic goats.**

**Data file S2. Autosomal regions identified as candidate selection sweeps by comparing genetic variants between 24 modern bezoars and 164 modern domestic goats.** The statistics significant regions for  $F_{ST}/\ln$ -ratio ( $\theta\pi$ , bezoar/ $\theta\pi$ , domestic)/XP-EHH in all four main groups (EUR, AFR, SWA-SAS, and EAS) were calculated separately. The "overlapped study" indicates the regions reside in 100 kb up- or down-stream of the regions reported in the corresponding literature. The functions related to these genes were annotated through literature mining.

**Data file S3. Variants with high derived allele frequency (> 0.95) in domestic goats.** The derived allele was identified as being absent in 24 modern bezoars and four ancient bezoars (Hovk1, Direkli1-2, Direkli6 and Direkli5). "Domestic Freq" represents the derived allele frequency in 164 modern domestic goats.

**Data file S4. The fecal egg counts (FEC) for gastrointestinal nematodes in 268 animals from a polymorphic goat population with *MUC6<sup>B</sup>* haplotype.** Three replicate measurements were made for each individual. Genotype key: dom = *MUC6<sup>D</sup>/MUC6<sup>D</sup>*, het = *MUC6<sup>B</sup>/MUC6<sup>D</sup>*, wild = *MUC6<sup>B</sup>/MUC6<sup>B</sup>*. Animals used for genome wide association study are indicated in bold.

**Data file S5. Genotyping at the *STIMI-RRM1* locus for the ancient and modern bezoars and goats.** The SNPs (represent by "position, ancestral allele/derived allele") denote the sites with nearly fixed derived allele (frequency > 0.95) in 164 modern domestic goats but as being absent in 24 modern bezoars and four ancient bezoars. The columns for each SNP show the number of reads that pass GATK quality filters and support each allele at those positions. Genotype key: "bezoar-like" = homozygous for bezoar haplotype, "heterozygous" = heterozygous for bezoar haplotype, and "domestic-like" = homozygous for domestic haplotype. Three recombinant individuals are marked in bold.

**Data file S6. Genotyping at the *MUC6* locus for the ancient and modern bezoars and goats.** The SNPs (represent by "position, ancestral allele/derived allele") denote the sites with nearly fixed derived allele (frequency > 0.95) in 164 modern domestic goats but as being absent in 24 modern bezoars and four ancient bezoars. The columns for each SNP show the number of reads that pass GATK quality filters and support each allele at those positions. Genotype key: "bezoar-like" = homozygous for bezoar haplotype, "heterozygous" = heterozygous for bezoar haplotype, and "domestic-like" = homozygous for domestic haplotype.

**Data file S7. Scaffolds that were putatively inferred as representing goat Y chromosome.**

## REFERENCES

1. G. Larson, D. Q. Fuller, The evolution of animal domestication. *Annu. Rev. Ecol. Evol. Syst.* **45**, 115–136 (2014).
2. M. A. Zeder, Domestication and early agriculture in the Mediterranean Basin: Origins, diffusion, and impact. *Proc. Natl. Acad. Sci. U.S.A.* **105**, 11597–11604 (2008).
3. F. Pereira, A. Amorim, in *Origin and Spread of Goat Pastoralism* (John Wiley & Sons, 2010).
4. L. Colli, M. Milanese, A. Talenti, F. Bertolini, M. Chen, A. Crisà, K. G. Daly, M. Del Corvo, B. Guldbbrandtsen, J. A. Lenstra, B. D. Rosen, E. Vajana, G. Catillo, S. Joost, E. L. Nicolazzi, E. Rochat, M. F. Rothschild, B. Servin, T. S. Sonstegard, R. Steri, C. P. Van Tassell, P. Ajmone-Marsan, P. Crepaldi, A. Stella, AdaptMap Consortium, Genome-wide SNP profiling of worldwide goat populations reveals strong partitioning of diversity and highlights post-domestication migration routes. *Genet. Sel. Evol.* **50**, 58 (2018).
5. F. J. Alberto, F. Boyer, P. Orozco-terWengel, I. Streeter, B. Servin, P. de Villemereuil, B. Benjelloun, P. Librado, F. Biscarini, L. Colli, M. Barbato, W. Zamani, A. Alberti, S. Engelen, A. Stella, S. Joost, P. Ajmone-Marsan, R. Negrini, L. Orlando, H. R. Rezaei, S. Naderi, L. Clarke, P. Flicek, P. Wincker, E. Coissac, J. Kijas, G. Tosser-Klopp, A. Chikhi, M. W. Bruford, P. Taberlet, F. Pompanon, Convergent genomic signatures of domestication in sheep and goats. *Nat. Commun.* **9**, 813 (2018).
6. K. G. Daly, P. M. Delser, V. E. Mullin, A. Scheu, V. Mattiangeli, M. D. Teasdale, A. J. Hare, J. Burger, M. P. Verdugo, M. J. Collins, R. Kehati, C. M. Ereik, G. Bar-Oz, F. Pompanon, T. Cumer, C. Çakırlar, A. F. Mohaseb, D. Decruyenaere, H. Davoudi, O. Çevik, G. Rollefson, J.-D. Vigne, R. Khazaeli, H. Fathi, S. B. Doost, R. R. Sorkhani, A. A. Vahdati, E. W. Sauer, H. A. Kharanaghi, S. Maziar, B. Gasparian, R. Pinhasi, L. Martin, D. Orton, B. S. Arbuckle, N. Benecke, A. Manica, L. K. Horwitz, M. Mashkour, D. G. Bradley, Ancient goat genomes reveal mosaic domestication in the Fertile Crescent. *Science* **361**, 85–88 (2018).

7. N. Pidancier, S. Jordan, G. Luikart, P. Taberlet, Evolutionary history of the genus *Capra* (Mammalia, Artiodactyla): Discordance between mitochondrial DNA and Y-chromosome phylogenies. *Mol. Phylogenet. Evol.* **40**, 739–749 (2006).
8. S. E. Hammer, H. M. Schwammer, F. Suchentrunk, Evidence for introgressive hybridization of captive markhor (*Capra falconeri*) with domestic goat: Cautions for reintroduction. *Biochem. Genet.* **46**, 216–226 (2008).
9. C. Grossen, L. Keller, I. Biebach, International Goat Genome Consortium; D. Croll, Introgression from domestic goat generated variation at the major histocompatibility complex of alpine ibex. *PLOS Genet.* **10**, e1004438 (2014).
10. F. Racimo, S. Sankararaman, R. Nielsen, E. Huerta-Sánchez, Evidence for archaic adaptive introgression in humans. *Nat. Rev. Genet.* **16**, 359–371 (2015).
11. X.-J. Hu, J. Yang, X.-L. Xie, F.-H. Lv, Y.-H. Cao, W.-R. Li, M.-J. Liu, Y.-T. Wang, J.-Q. Li, Y.-G. Liu, Y.-L. Ren, Z.-Q. Shen, F. Wang, E. Hehua, J.-L. Han, M. H. Li, The genome landscape of tibetan sheep reveals adaptive introgression from argali and the history of early human settlements on the qinghai-tibetan plateau. *Mol. Biol. Evol.* **36**, 283–303 (2019).
12. D.-D. Wu, X.-D. Ding, S. Wang, J. M. Wójcik, Y. Zhang, M. Tokarska, Y. Li, M.-S. Wang, O. Faruque, R. Nielsen, Q. Zhang, Y.-P. Zhang, Pervasive introgression facilitated domestication and adaptation in the *Bos* species complex. *Nat. Ecol. Evol.* **2**, 1139–1145 (2018).
13. P. W. Hedrick, Adaptive introgression in animals: Examples and comparison to new mutation and standing variation as sources of adaptive variation. *Mol. Ecol.* **22**, 4606–4618 (2013).
14. Z. Sun, J. Shao, L. Liu, J. Cui, M. F. Bonomo, Q. Guo, X. Wu, J. Wang, The first Neolithic urban center on China's north Loess Plateau: The rise and fall of Shimao. *Archaeol. Res. Asia* **14**, 33–45 (2018).



15. Y. Dong, X. Zhang, M. Xie, B. Arefnezhad, Z. Wang, W. Wang, S. Feng, G. Huang, R. Guan, W. Shen, R. Bunch, R. M. Culloch, Q. Li, B. Li, G. Zhang, X. Xu, J. W. Kijas, G. H. Salekdeh, W. Wang, Y. Jiang, Reference genome of wild goat (*Capra aegagrus*) and sequencing of goat breeds provide insight into genic basis of goat domestication. *BMC Genomics* **16**, 431–431 (2015).
16. V. Manceau, L. Després, J. Bouvet, P. Taberlet, Systematics of the genus *Capra* inferred from mitochondrial DNA sequence data. *Mol. Phylogenet. Evol.* **13**, 504–510 (1999).
17. D. M. Shackleton, *Wild sheep and goats and their relatives : Status survey and conservation action plan for Caprinae* (International Union for Conservation of Nature and Natural Resources, 1997).
18. S. Naderi, H.-R. Rezaei, F. Pompanon, M. G. B. Blum, R. Negrini, H.-R. Naghash, Ö. Balkiz, M. Mashkour, O. E. Gaggiotti, P. Ajmone-Marsan, A. Kence, J.-D. Vigne, P. Taberlet, The goat domestication process inferred from large-scale mitochondrial DNA analysis of wild and domestic individuals. *Proc. Natl. Acad. Sci. U.S.A.* **105**, 17659–17664 (2008).
19. M. A. Miguel, C. N. Mingala, Screening of pig (*Sus scrofa*) bactericidal permeability-increasing protein (BPI) gene as marker for disease resistance. *Anim. Biotechnol.* **30**, 146–150 (2019).
20. W. Yan, C. Zheng, J. He, W. Zhang, X.-A. Huang, X. Li, Y. Wang, X. Wang, Eleutheroside B1 mediates its anti-influenza activity through POLR2A and N-glycosylation. *Int. J. Mol. Med.* **42**, 2776–2792 (2018).
21. A. Omoumi, A. Fok, G.-Y. Hsiung, P4- 246: Analysis of two immune function genes (CR1 and CD2AP) in Alzheimer's disease in two large Canadian cohorts. *Alzheimers Dement.* **8**, P722 (2012).
22. S. D. Babu, V. Jayanthi, N. Devaraj, C. A. Reis, H. Devaraj, Expression profile of mucins (MUC2, MUC5AC and MUC6) in *Helicobacter pylori* infected pre-neoplastic and neoplastic human gastric epithelium. *Mol. Cancer* **5**, 10 (2006).
23. M. A. McGuckin, S. K. Lindén, P. Sutton, T. H. Florin, Mucin dynamics and enteric pathogens. *Nat. Rev. Microbiol.* **9**, 265–278 (2011).

24. M. V. Benavides, T. S. Sonstegard, C. Van Tassell, Genomic regions associated with sheep resistance to gastrointestinal nematodes. *Trends Parasitol.* **32**, 470–480 (2016).
25. J. Hartmann, R. M. Karl, R. P. D. Alexander, H. Adelsberger, M. S. Brill, C. Rühlmann, A. Ansel, K. Sakimura, Y. Baba, T. Kurosaki, T. Misgeld, A. Konnerth, STIM1 controls neuronal Ca<sup>2+</sup> signaling, mGluR1-dependent synaptic transmission, and cerebellar motor behavior. *Neuron* **82**, 635–644 (2014).
26. Ł. Majewski, F. Maciag, P. M. Boguszewski, I. Wasilewska, G. Wiera, T. Wójtowicz, J. Mozrzymas, J. Kuznicki, Overexpression of STIM1 in neurons in mouse brain improves contextual learning and impairs long-term depression. *Biochim. Biophys. Acta. Mol. Cell Res.* **1864**, 1071–1087 (2017).
27. C. Ryu, D. C. Jang, D. Jung, Y. G. Kim, H. G. Shim, H.-H. Ryu, Y.-S. Lee, D. J. Linden, P. F. Worley, S. J. Kim, STIM1 regulates somatic Ca<sup>2+</sup> Signals and intrinsic firing properties of cerebellar purkinje neurons. *J. Neurosci.* **37**, 8876–8894 (2017).
28. J. C. Craig, G. D. Bennett, R. C. Miranda, S. A. Mackler, R. H. Finnell, Ribonucleotide reductase subunit r1: A gene conferring sensitivity to valproic acid-induced neural tube defects in mice. *Teratology* **61**, 305–313 (2000).
29. M. Rinaldi, L. Dreesen, P. R. Hoorens, R. W. Li, E. Claerebout, B. Goddeeris, J. Vercruyse, W. Van Den Broek, P. Geldhof, Infection with the gastrointestinal nematode *Ostertagia ostertagi* in cattle affects mucus biosynthesis in the abomasum. *Vet. Res.* **42**, 61 (2011).
30. H. V. Simpson, S. Umair, V. C. Hoang, M. S. Savoian, Histochemical study of the effects on abomasal mucins of *Haemonchus contortus* or *Teladorsagia circumcincta* infection in lambs. *Vet. Parasitol.* **226**, 210–221 (2016).
31. N. Moniaux, F. Escande, N. Porchet, J.-P. Aubert, S. K. Batra, Structural organization and classification of the human mucin genes. *Front. Biosci.* **6**, D1192-D1206 (2001).

32. S. Z. Hasnain, A. L. Gallagher, R. K. Grencis, D. J. Thornton, A new role for mucins in immunity: Insights from gastrointestinal nematode infection. *Int. J. Biochem. Cell Biol.* **45**, 364–374 (2013).
33. D. Lawrence, G. Philip, H. Hunt, L. Snape-Kennedy, T. J. Wilkinson, Long term population, city size and climate trends in the fertile crescent: A first approximation. *PLOS ONE* **11**, e0152563 (2016).
34. K. N. Harper, G. J. Armelagos, Genomics, the origins of agriculture, and our changing microbe-scape: Time to revisit some old tales and tell some new ones. *Am. J. Phys. Anthropol.* **152**, 135–152 (2013).
35. F. Pereira, S. J. M. Davis, L. Pereira, B. McEvoy, D. G. Bradley, A. Amorim, Genetic signatures of a Mediterranean influence in Iberian Peninsula sheep husbandry. *Mol. Biol. Evol.* **23**, 1420–1426 (2006).
36. B. S. Arbuckle, Pace and process in the origins of animal husbandry in Neolithic Southwest Asia. *Bioarchaeol. Near East* **8**, 53–81 (2014).
37. C. Vilà, J. Seddon, H. Ellegren, Genes of domestic mammals augmented by backcrossing with wild ancestors. *Trends Genet.* **21**, 214–218 (2005).
38. E. Huerta-Sánchez, X. Jin, Asan, Z. Bianba, B. M. Peter, N. Vinckenbosch, Y. Liang, X. Yi, M. He, M. Somel, P. Ni, B. Wang, X. Ou, Huasang, J. Luosang, Z. X. P. Cuo, K. Li, G. Gao, Y. Yin, W. Wang, X. Zhang, X. Xu, H. Yang, Y. Li, J. Wang, J. Wang, R. Nielsen, Altitude adaptation in Tibetans caused by introgression of Denisovan-like DNA. *Nature* **512**, 194–197 (2014).
39. M. R. Jones, L. S. Mills, P. C. Alves, C. M. Callahan, J. M. Alves, D. J. R. Lafferty, F. M. Jiggins, J. D. Jensen, J. Melo-Ferreira, J. M. Good, Adaptive introgression underlies polymorphic seasonal camouflage in snowshoe hares. *Science* **360**, 1355–1358 (2018).
40. M. Dannemann, A. M. Andrés, J. Kelso, Introgression of neandertal- and denisovan-like haplotypes contributes to adaptive variation in human toll-like receptors. *Am. J. Hum. Genet.* **98**, 22–33 (2016).

41. L. Abi-Rached, M. J. Jobin, S. Kulkarni, A. McWhinnie, K. Dalva, L. Gragert, F. Babrzadeh, B. Gharizadeh, M. Luo, F. A. Plummer, J. Kimani, M. Carrington, D. Middleton, R. Rajalingam, M. Beksac, S. G. E. Marsh, M. Maiers, L. A. Guethlein, S. Tavoularis, A.-M. Little, R. E. Green, P. J. Norman, P. Parham, The shaping of modern human immune systems by multiregional admixture with archaic humans. *Science* **334**, 89–94 (2011).
42. F. L. Mendez, J. C. Watkins, M. F. Hammer, Neandertal origin of genetic variation at the cluster of *OAS* immunity genes. *Mol. Biol. Evol.* **30**, 798–801 (2013).
43. M. Giacometti, R. Roganti, D. D. Tann, N. Stahlberger-Saitbekova, G. Obexer-Ruff, Alpine ibex *Capra ibex ibex* x domestic goat *C. aegagrus* domesticahybrids in a restricted area of southern Switzerland. *Wildl. Biol.* **10**, 137–143 (2004).
44. K. Junker, I. G. Horak, B. Penzhorn, History and development of research on wildlife parasites in southern Africa, with emphasis on terrestrial mammals, especially ungulates. *Int. J. Parasitol. Par.* **4**, 50–70 (2015).
45. T. S. Korneliussen, A. Albrechtsen, R. Nielsen, ANGSD: Analysis of next generation sequencing data. *BMC Bioinform.* **15**, 356 (2014).
46. A. McKenna, M. Hanna, E. Banks, A. Sivachenko, K. Cibulskis, A. Kernytsky, K. Garimella, D. Altshuler, S. Gabriel, M. Daly, M. A. DePristo, The genome analysis toolkit: A MapReduce framework for analyzing next-generation DNA sequencing data. *Genome Res.* **20**, 1297–1303 (2010).
47. P. Danecek, A. Auton, G. Abecasis, C. A. Albers, E. Banks, M. A. Depristo, R. E. Handsaker, G. Lunter, G. T. Marth, S. T. Sherry, G. McVean, R. Durbin, 1000 Genomes Project Analysis Group, The variant call format and VCFtools. *Bioinformatics* **27**, 2156–2158 (2011).

48. S. R. Browning, B. L. Browning, Rapid and accurate haplotype phasing and missing-data inference for whole-genome association studies by use of localized haplotype clustering. *Am. J. Hum. Genet.* **81**, 1084–1097 (2007).
49. B. L. Browning, S. R. Browning, Genotype imputation with millions of reference samples. *Am. J. Hum. Genet.* **98**, 116–126 (2016).
50. S. Zhao, P. Zheng, S. Dong, X. Zhan, Q. Wu, X. Guo, Y. Hu, W. He, S. Zhang, W. Fan, L. Zhu, D. Li, X. Zhang, Q. Chen, H. Zhang, Z. Zhang, X. Jin, J. Zhang, H. Yang, J. Wang, J. Wang, F. Wei, Whole-genome sequencing of giant pandas provides insights into demographic history and local adaptation. *Nat. Genet.* **45**, 67–71 (2013).
51. J. P. de Magalhães, J. Costa, A database of vertebrate longevity records and their relation to other life-history traits. *J. Evol. Biol.* **22**, 1770–1774 (2009).
52. L. Chen, Q. Qiu, Y. Jiang, K. Wang, Z. Lin, Z. Li, F. Bibi, Y. Yang, J. Wang, W. Nie, W. Su, G. Liu, Q. Li, W. Fu, X. Pan, C. Liu, J. Yang, C. Zhang, Y. Yin, Y. Wang, Y. Zhao, C. Zhang, Z. Wang, Y. Qin, W. Liu, B. Wang, Y. Ren, R. Zhang, Y. Zeng, R. R. da Fonseca, B. Wei, R. Li, W. Wan, R. Zhao, W. Zhu, Y. Wang, S. Duan, Y. Gao, Y. E. Zhang, C. Chen, C. Hvilsom, C. W. Epps, L. G. Chemnick, Y. Dong, S. Mirarab, H. R. Siegismund, O. A. Ryder, M. T. P. Gilbert, H. A. Lewin, G. Zhang, R. Heller, W. Wang, Large-scale ruminant genome sequencing provides insights into their evolution and distinct traits. *Science* **364**, eaav6202 (2019).
53. S. R. Browning, B. L. Browning, Y. Zhou, S. Tucci, J. M. Akey, Analysis of human sequence data reveals two pulses of archaic denisovan admixture. *Cell* **173**, 53–61.e59 (2018).
54. C. Xie, X. Mao, J. Huang, Y. Ding, J. Wu, S. Dong, L. Kong, G. Gao, C.-Y. Li, L. Wei, KOBAS 2.0: A web server for annotation and identification of enriched pathways and diseases. *Nucleic Acids Res.* **39**, W316–W322 (2011).

55. H. Li, Minimap and miniiasm: Fast mapping and de novo assembly for noisy long sequences. *Bioinformatics* **32**, 2103–2110 (2016).
56. A. Heger, L. Holm, Rapid automatic detection and alignment of repeats in protein sequences. *Proteins* **41**, 224–237 (2000).
57. H. V. Whitlock, Some modifications of the McMaster helminth egg-counting technique and apparatus. *J. Council Sci. Ind. Res. Au.* **21**, 177–180 (1948).
58. J. Meisner, A. Albrechtsen, Inferring population structure and admixture proportions in low depth NGS Data. *Genetics* **210**, 719–731 (2018).
59. H. M. Kang, J. H. Sul, S. K. Service, N. A. Zaitlen, S.-Y. Kong, N. B. Freimer, C. Sabatti, E. Eskin, Variance component model to account for sample structure in genome-wide association studies. *Nat. Genet.* **42**, 348–354 (2010).
60. A. M. Bolger, M. Lohse, B. Usadel, Trimmomatic: A flexible trimmer for Illumina sequence data. *Bioinformatics* **30**, 2114–2120 (2014).
61. D. M. Bickhart, B. D. Rosen, S. Koren, B. L. Sayre, A. R. Hastie, S. Chan, J. Lee, E. T. Lam, I. Liachko, S. T. Sullivan, J. N. Burton, H. J. Huson, J. C. Nystrom, C. M. Kelley, J. L. Hutchison, Y. Zhou, J. Sun, A. Crisà, F. A. P. de León, J. C. Schwartz, J. A. Hammond, G. C. Waldbieser, S. G. Schroeder, G. E. Liu, M. J. Dunham, J. Shendure, T. S. Sonstegard, A. M. Phillippy, C. P. Van Tassell, T. P. L. Smith, Single-molecule sequencing and chromatin conformation capture enable de novo reference assembly of the domestic goat genome. *Nat. Genet.* **49**, 643–650 (2017).
62. H. Li, Aligning sequence reads, clone sequences and assembly contigs with BWA-MEM. arXiv:1303.3997v2 [q-bio.GN], (26 May 2013).
63. K. Okonechnikov, A. Conesa, F. García-Alcalde, Qualimap 2: Advanced multi-sample quality control for high-throughput sequencing data. *Bioinformatics* **32**, 292–294 (2016).

64. N. Chen, Y. Cai, Q. Chen, R. Li, K. Wang, Y. Huang, S. Hu, S. Huang, H. Zhang, Z. Zheng, W. Song, Z. Ma, Y. Ma, R. Dang, Z. Zhang, L. Xu, Y. Jia, S. Liu, X. Yue, W. Deng, X. Zhang, Z. Sun, X. Lan, J. Han, H. Chen, D. G. Bradley, Y. Jiang, C. Lei, Whole-genome resequencing reveals world-wide ancestry and adaptive introgression events of domesticated cattle in East Asia. *Nat. Commun.* **9**, 2337 (2018).
65. P. J. Reimer, E. Bard, A. Bayliss, J. W. Beck, P. G. Blackwell, C. B. Ramsey, C. E. Buck, H. Cheng, R. L. Edwards, M. Friedrich, P. M. Grootes, T. P. Guilderson, H. Haflidison, I. Hajdas, C. Hatté, T. J. Heaton, D. L. Hoffmann, A. G. Hogg, K. A. Hughen, K. Felix Kaiser, B. Kromer, S. W. Manning, M. Niu, R. W. Reimer, D. A. Richards, E. Marion Scott, J. R. Southon, R. A. Staff, C. S. M. Turney, J. van der Plicht, IntCal13 and Marine13 radiocarbon age calibration curves 0–50,000 Years cal BP. *Radiocarbon* **55**, 1869–1887 (2013).
66. D. Y. Yang, B. Eng, J. S. Wayne, J. C. Dудар, S. R. Saunders, Technical note: Improved DNA extraction from ancient bones using silica-based spin columns. *Am. J. Phys. Anthropol.* **105**, 539–543 (1998).
67. M. Schubert, S. Lindgreen, L. Orlando, AdapterRemoval v2: Rapid adapter trimming, identification, and read merging. *BMC. Res. Notes* **9**, 88 (2016).
68. H. Li, R. Durbin, Fast and accurate short read alignment with Burrows-Wheeler transform. *Bioinformatics* **25**, 1754–1760 (2009).
69. H. Li, B. Handsaker, A. Wysoker, T. Fennell, J. Ruan, N. Homer, G. Marth, G. Abecasis, R. Durbin, 1000 Genome Project Data Processing Subgroup, The sequence alignment/map format and SAMtools. *Bioinformatics* **25**, 2078–2079 (2009).
70. H. Jónsson, A. Ginolhac, M. Schubert, P. L. F. Johnson, L. Orlando, mapDamage2. 0: Fast approximate Bayesian estimates of ancient DNA damage parameters. *Bioinformatics* **29**, 1682–1684 (2013).

71. B. S. Pedersen, A. R. Quinlan, Mosdepth: Quick coverage calculation for genomes and exomes. *Bioinformatics* **34**, 867–868 (2017).
72. A. Peltzer, G. Jäger, A. Herbig, A. Seitz, C. Kniep, J. Krause, K. Nieselt, EAGER: Efficient ancient genome reconstruction. *Genome Biol.* **17**, 60 (2016).
73. M. Martin, Cutadapt removes adapter sequences from high-throughput sequencing reads. *EMBnet. J.* **17**, 10–12 (2011).
74. S. Purcell, B. Neale, K. Todd-Brown, L. Thomas, M. A. R. Ferreira, D. Bender, J. Maller, P. Sklar, P. I W de Bakker, M. J. Daly, P. C. Sham, PLINK: A tool set for whole-genome association and population-based linkage analyses. *Am. J. Hum. Genet.* **81**, 559–575 (2007).
75. K. Tamura, G. Stecher, D. Peterson, A. Filipski, S. Kumar, MEGA6: Molecular evolutionary genetics analysis version 6.0. *Mol. Biol. Evol.* **30**, 2725–729 (2013).
76. I. Letunic, P. Bork, Interactive tree of life (iTOL) v3: An online tool for the display and annotation of phylogenetic and other trees. *Nucleic Acids Res.* **44**, W242–W245 (2016).
77. A. Cornish-Bowden, Nomenclature for incompletely specified bases in nucleic acid sequences: recommendations 1984. *Nucleic Acids Res.* **13**, 3021–3030 (1985).
78. A. Stamatakis, RAxML version 8: A tool for phylogenetic analysis and post-analysis of large phylogenies. *Bioinformatics* **30**, 1312–1313 (2014).
79. N. Patterson, A. L. Price, D. Reich, Population structure and eigenanalysis. *PLOS Genet.* **2**, e190 (2006).
80. D. H. Alexander, J. Novembre, K. Lange, Fast model-based estimation of ancestry in unrelated individuals. *Genome Res.* **19**, 1655–1664 (2009).
81. R. D. C. Team, R: A language and environment for statistical computing. R foundation for statistical computing. *Computing* **1**, 12–21 (2016).



82. S. J. Puechmaille, The program structure does not reliably recover the correct population structure when sampling is uneven: Subsampling and new estimators alleviate the problem. *Mol. Ecol. Resour.* **16**, 608–627 (2016).
83. L. Excoffier, I. Dupanloup, E. Huerta-Sánchez, V. C. Sousa, M. Foll, Robust demographic inference from genomic and SNP data. *PLOS Genet.* **9**, e1003905 (2013).
84. J. K. Pickrell, J. K. Pritchard, Inference of population splits and mixtures from genome-wide allele frequency data. *PLOS Genet.* **8**, e1002967 (2012).
85. D. J. Lawson, G. Hellenthal, S. Myers, D. Falush, Inference of population structure using dense haplotype data. *PLOS Genet.* **8**, e1002453 (2012).
86. J. C. Barrett, B. Fry, J. Maller, M. J. Daly, Haploview: Analysis and visualization of LD and haplotype maps. *Bioinformatics* **21**, 263–265 (2005).
87. S. Schiffels, R. Durbin, Inferring human population size and separation history from multiple genome sequences. *Nat. Genet.* **46**, 919–925 (2014).
88. R. E. Handsaker, V. Van Doren, J. R. Berman, G. Genovese, S. Kashin, L. M. Boettger, S. A. McCarroll, Large multiallelic copy number variations in humans. *Nat. Genet.* **47**, 296–303 (2015).
89. J. Terhorst, J. A. Kamm, Y. S. Song, Robust and scalable inference of population history from hundreds of unphased whole genomes. *Nat. Genet.* **49**, 303–309 (2017).
90. R. N. Gutenkunst, R. D. Hernandez, S. H. Williamson, C. D. Bustamante, Inferring the joint demographic history of multiple populations from multidimensional SNP frequency data. *PLOS Genet.* **5**, e1000695 (2009).
91. R. Nielsen, T. Korneliussen, A. Albrechtsen, Y. Li, J. Wang, SNP calling, genotype calling, and sample allele frequency estimation from New-Generation Sequencing data. *PLOS ONE* **7**, e37558 (2012).

92. J. B. Johnson, K. S. Omland, Model selection in ecology and evolution. *Trends Ecol. Evol.* **19**, 101–108 (2004).
93. A. W. Briggs, J. M. Good, R. E. Green, J. Krause, T. Maricic, U. Stenzel, C. Lalueza-Fox, P. Rudan, D. Brajković, Ž. Kučan, I. Gušić, R. Schmitz, V. B. Doronichev, L. V. Golovanova, M. de la Rasilla, J. Fortea, A. Rosas, S. Pääbo, Targeted retrieval and analysis of five Neandertal mtDNA genomes. *Science* **325**, 318–321 (2009).
94. K. Katoh, D. M. Standley, MAFFT multiple sequence alignment software version 7: Improvements in performance and usability. *Mol. Biol. Evol.* **30**, 772–780 (2013).
95. X. Wang, Z. Zheng, Y. Cai, T. Chen, C. Li, W. Fu, Y. Jiang, CNVcaller: Highly efficient and widely applicable software for detecting copy number variations in large populations. *GigaScience* **6**, 1–12 (2017).
96. E. Paradis, pegas: An R package for population genetics with an integrated–modular approach. *Bioinformatics* **26**, 419–420 (2010).
97. J. A. Lenstra, Evolutionary and demographic history of sheep and goats suggested by nuclear, mtDNA and Y chromosome markers, in *The Role of Biotechnology for the Characterization and Conservation of Crop, Forestry, Animal and Fishery Genetic Resources* (International Workshop, Turin, Italy, 5 to 7 March 2005), pp. 1–4.
98. R. Bouckaert, J. Heled, D. Kühnert, T. Vaughan, C.-H. Wu, D. Xie, M. A. Suchard, A. Rambaut, A. J. Drummond, BEAST 2: A software platform for Bayesian evolutionary analysis. *PLOS Comput. Biol.* **10**, e1003537 (2014).
99. D. Darriba, G. L. Taboada, R. Doallo, D. Posada, jModelTest 2: More models, new heuristics and parallel computing. *Nat. Methods* **9**, 772 (2012).
100. N. Patterson, P. Moorjani, Y. Luo, S. Mallick, N. Rohland, Y. Zhan, T. Genschoreck, T. Webster, D. Reich, Ancient admixture in human history. *Genetics* **192**, 1065–1093 (2012).

101. C. Gaunitz, A. Fages, K. Hanghøj, A. Albrechtsen, N. Khan, M. Schubert, A. Seguin-Orlando, I. J. Owens, S. Felkel, O. Bignon-Lau, P. de Barros Damgaard, A. Mittnik, A. F. Mohaseb, H. Davoudi, S. Alquraishi, A. H. Alfarhan, K. A. S. Al-Rasheid, E. Crubézy, N. Benecke, S. Olsen, D. Brown, D. Anthony, K. Massy, V. Pitulko, A. Kasparov, G. Brem, M. Hofreiter, G. Mukhtarova, N. Baimukhanov, L. Lõugas, V. Onar, P. W. Stockhammer, J. Krause, B. Boldgiv, S. Undrakhbold, D. Erdenebaatar, S. Lepetz, M. Mashkour, A. Ludwig, B. Wallner, V. Merz, I. Merz, V. Zaibert, E. Willerslev, P. Librado, A. K. Outram, L. Orlando, Ancient genomes revisit the ancestry of domestic and Przewalski's horses. *Science* **360**, 111–114 (2018).
102. S. Soraggi, C. Wiuf, A. Albrechtsen, Powerful inference with the D-statistic on low-coverage whole-genome data. *G3* **8**, 551–566 (2018).
103. H. Tang, D. O. Siegmund, P. Shen, P. J. Oefner, M. W. Feldman, Frequentist estimation of coalescence times from nucleotide sequence data using a tree-based partition. *Genetics* **161**, 447–459 (2002).
104. G. Ewing, J. Hermisson, MSMS: A coalescent simulation program including recombination, demographic structure and selection at a single locus. *Bioinformatics* **26**, 2064–2065 (2010).
105. F. Gao, C. Ming, W. Hu, H. Li, New software for the fast estimation of population recombination rates (FastEPRR) in the genomic era. *G3* **6**, 1563–1571 (2016).
106. T. S. Korneliussen, I. Moltke, A. Albrechtsen, R. Nielsen, Calculation of Tajima's D and other neutrality test statistics from low depth next-generation sequencing data. *Bmc Bioinformatics* **14**, 289 (2013).
107. Z. A. Szpiech, R. D. Hernandez, selscan: An efficient multithreaded program to perform EHH-based scans for positive selection. *Mol. Biol. Evol.* **31**, 2824–2827 (2014).
108. M. Degiorgio, C. D. Huber, M. J. Hubisz, I. Hellmann, R. Nielsen, S WEEP FINDER 2: Increased sensitivity, robustness and flexibility. *Bioinformatics* **32**, 1895–1897 (2015).

109. C. A. Heinlein, C. Chang, The roles of androgen receptors and androgen-binding proteins in nongenomic androgen actions. *Mol. Endocrinol.* **16**, 2181–2187 (2002).
110. P. Veinberg, Analysis of horn shape and coat coloration in *Capra* (Artiodactyla). *Byulleten Moskovskogo Obshchestva Ispytatelei Prirody, Otdel biologicheskii* **98**, 3–14 (1993).
111. S. Jordan, C. Miquel, P. Taberlet, G. Luikart, Sequencing primers and SNPs for rapidly evolving reproductive loci in endangered ibex and their kin (Bovidae, *Capra* spp.). *Mol. Ecol. Notes* **6**, 776–779 (2006).
112. F. G. Vieira, F. Lassalle, T. S. Korneliussen, M. Fumagalli, Improving the estimation of genetic distances from next-generation sequencing data. *Biol. J. Linn. Soc.* **117**, 139–149 (2015).
113. V. Lefort, R. Desper, O. Gascuel, FastME 2.0: A comprehensive, accurate, and fast distance-based phylogeny inference program. *Mol. Biol. Evol.* **32**, 2798–2800 (2015).
114. B. L. Browning, S. R. Browning, Improving the accuracy and efficiency of identity-by-descent detection in population data. *Genetics* **194**, 459–471 (2013).
115. H. Hu, N. Petousi, G. Glusman, Y. Yu, R. Bohlender, T. Tashi, J. M. Downie, J. C. Roach, A. M. Cole, F. R. Lorenzo, A. R. Rogers, M. E. Brunkow, G. Cavalleri, L. Hood, S. M. Alpaty, J. T. Prchal, L. B. Jorde, P. A. Robbins, T. S. Simonson, C. D. Huff, Evolutionary history of Tibetans inferred from whole-genome sequencing. *PLOS Genet.* **13**, e1006675 (2017).
116. Y. Dong, M. Xie, Y. Jiang, N. Xiao, X. Du, W. Zhang, G. Tosser-Klopp, J. Wang, S. Yang, J. Liang, W. Chen, J. Chen, P. Zeng, Y. Hou, C. Bian, S. Pan, Y. Li, X. Liu, W. Wang, B. Servin, B. Sayre, B. Zhu, D. Sweeney, R. Moore, W. Nie, Y. Shen, R. Zhao, G. Zhang, J. Li, T. Faraut, J. Womack, Y. Zhang, J. Kijas, N. Cockett, X. Xu, S. Zhao, J. Wang, W. Wang, Sequencing and automated whole-genome optical mapping of the genome of a domestic goat (*Capra hircus*). *Nat. Biotechnol.* **31**, 135–141 (2013).

117. I. Letunic, T. Doerks, P. Bork, SMART 7: Recent updates to the protein domain annotation resource. *Nucleic Acids Res.* **40**, D302–D305 (2012).
118. E. L. Clark, S. J. Bush, M. E. B. McCulloch, I. L. Farquhar, R. Young, L. Lefevre, C. Pridans, H. G. Tsang, C. Wu, C. Afrasiabi, M. Watson, C. B. Whitelaw, T. C. Freeman, K. M. Summers, A. L. Archibald, D. A. Hume, A high resolution atlas of gene expression in the domestic sheep (*Ovis aries*). *PLOS Genet.* **13**, e1006997 (2017).
